# Supplementary material for: Small-molecule binding sites to explore protein–protein interactions in the cancer proteome
Source: Royal Society of Chemistry journal article supplement (doi:10.1039/c6mb00231e), 2016-07-05
Supplement: c6mb00231e1.xlsx [file c6mb00231e1.xlsx]

## Sheet: BRCA
Protein		Cancer		Structure
Symbol	Name	FC	Cancer Publications	PDB	All	ENZ	PPI	OTH
MMP1	Interstitial collagenase	6.8	533	1SU3A	3	0	0	3
BPIFA1	BPI fold-containing family A member 1	6.8	38	4KGHB	2	0	0	2
MMP13	Collagenase 3	6.4	317	4FVLA	2	0	1	1
CA9	Carbonic anhydrase 9	6.3	872	3IAIC	3	1	0	2
MAGEA4	Melanoma-associated antigen 4	6	142	2WA0A	1	0	0	1
CYP2A7	Cytochrome P450 2A7	5.8	22	2PG6B	3	0	0	3
ORM1	Alpha-1-acid glycoprotein 1	5.5	25	3KQ0A	1	0	0	1
DPYSL5	Dihydropyrimidinase-related protein 5	4.7	43	4B90B	2	0	0	2
ORM2	Alpha-1-acid glycoprotein 2	4.7	15	3APUB	1*	0	0	1
CPB1	Carboxypeptidase B	4.7	58	1KWMA	3	0	3	0
ROS1	Proto-oncogene tyrosine-protein kinase ROS	4.6	256	3ZBFA	1*	1	0	0
SERPINB4	Serpin B4	4.5	7	2ZV6A	4	0	0	4
PGLYRP3	Peptidoglycan recognition protein 3	4.4	1	2APHA	1	0	0	1
NEK2	Serine/threonine-protein kinase Nek2	4.4	113	2XK4A	3*	1	0	2
CYP2A13	Cytochrome P450 2A13	4.4	66	3T3SH	4	0	0	4
PKMYT1	Membrane-associated tyrosine- and threonine-specific cdc2-inhibitory kinase	4.3	13	3P1AA	2	1	0	1
HCN2	Potassium/sodium hyperpolarization-activated cyclic nucleotide-gated channel 2	4.3	8	3OTFA	1	1	0	0
BMPR1B	Bone morphogenetic protein receptor type-1B	4.3	59	3MDYC	3*	1	0	2
TDO2	Tryptophan 2,3-dioxygenase	4.3	51	4PW8F	2	1	1	1
PNLIP	Pancreatic triacylglycerol lipase	4.3	8	1LPBB	2	1	0	1
SERPINB3	Serpin B3	4.2	33	2ZV6A	4	0	0	4
HIST1H2BO	Histone H2B type 1-O	4.2	1	3AV1D	1	0	1	0
EPO	Erythropoietin	4.1	5134	1EERA	2	0	0	2
IFNL2	Interferon lambda-2	4.1	0	3HHCC	1	0	0	1
GABBR2	Gamma-aminobutyric acid type B receptor subunit 2	4.1	2	4F11A	2	0	0	2
UGT2B4	UDP-glucuronosyltransferase 2B4	4.1	26	2O6LA	1	0	0	1
EPHA8	Ephrin type-A receptor 8	3.9	14	3KULB	3	1	0	2
MELK	Maternal embryonic leucine zipper kinase	3.9	61	4UMUA	4*	1	0	3
PNLIPRP2	Pancreatic lipase-related protein 2	3.9	3	2OXEA	1	1	1	0
AOC1	Amiloride-sensitive amine oxidase [copper-containing]	3.9	0	3MPHA	7	1	2	4
CDC25C	M-phase inducer phosphatase 3	3.9	630	3OP3A	1	0	0	1
CYP2A6	Cytochrome P450 2A6	3.9	323	2PG6B	3	0	0	3
ITPKA	Inositol-trisphosphate 3-kinase A	3.8	10	1W2FA	1	1	0	0
GAD1	Glutamate decarboxylase 1	3.8	27	3VP6B	3	1	1	1
RBP2	Retinol-binding protein 2	3.8	40	2RCTA	1	0	0	1
EXO1	Exonuclease 1	3.7	171	3QEBZ	3	0	0	3
BIRC5	Baculoviral IAP repeat-containing protein 5	3.7	3230	3UEHA	1	0	0	1
PLK1	Serine/threonine-protein kinase PLK1	3.7	743	1Q4KB;2OWBA	4*	1	1	2
ELAVL3	ELAV-like protein 3	3.7	13	1G2EA	1	0	0	1
AURKB	Aurora kinase B	3.7	482	4AF3A	2*	1	0	1
CDC20	Cell division cycle protein 20 homolog	3.7	291	4GGDB	2*	0	0	2
KIF2C	Kinesin-like protein KIF2C	3.6	41	2HEHA	2	1	0	1
BUB1	Mitotic checkpoint serine/threonine-protein kinase BUB1	3.6	378	4R8QA	4	1	0	3
TOP2A	DNA topoisomerase 2-alpha	3.6	355	4R1FA;4FM9A	8	2	0	6
GRIA2	Glutamate receptor 2	3.6	25	2WJWA	3	0	0	3
UHRF1	E3 ubiquitin-protein ligase UHRF1	3.6	112	4GY5B;2PB7A	2	1	0	1
MMP9	Matrix metalloproteinase-9	3.5	6042	1ITVA;1L6JA	6	1	0	5
RRM2	Ribonucleoside-diphosphate reductase subunit M2	3.5	142	2UW2A	2	0	0	2
GSTA3	Glutathione S-transferase A3	3.5	16	1USBB	2	1	0	1
INHBA	Inhibin beta A chain	3.4	43	1S4YB	1	0	0	1
RAB26	Ras-related protein Rab-26	3.4	3	2G6BA	2	1	0	1
HAO1	Hydroxyacid oxidase 1	3.4	2	2NZLA	2	1	0	1
GC	Vitamin D-binding protein	3.4	7627	1J78A	6	0	2	4
NGB	Neuroglobin	3.4	33	1OJ6A	1	0	0	1
PROC	Vitamin K-dependent protein C	3.4	28555	1AUTC	1*	1	0	0
IFNL1	Interferon lambda-1	3.3	5	3OG6A	1	0	0	1
FGG	Fibrinogen gamma chain	3.3	191	3GHGF	1	0	0	1
TPH2	Tryptophan 5-hydroxylase 2	3.3	11	4V06A	2	1	1	0
NAT1	Arylamine N-acetyltransferase 1	3.3	361	2IJAA	1	1	0	0
LIPF	Gastric triacylglycerol lipase	3.3	3	1HLGA	3	0	0	3
IFNL3	Interferon lambda-3	3.3	7	3HHCC	1	0	0	1
MMP10	Stromelysin-2	3.3	90	4ILWF	1	0	1	0
KIFC1	Kinesin-like protein KIFC1	3.3	10	2REPA	2	1	0	1
CAPN9	Calpain-9	3.3	9	1ZIVA	1	0	0	1
AURKA	Aurora kinase A	3.2	655	2J4ZB	2*	1	0	1
KLK4	Kallikrein-4	3.2	92	4K8YA	1*	1	0	0
TK1	Thymidine kinase, cytosolic	3.2	222	2ORVB	1*	1	0	0
CD1A	T-cell surface glycoprotein CD1a	3.2	887	1ONQA	2	0	0	2
HIST1H2BH	Histone H2B type 1-H	3.1	0	3AV1D	1	0	1	0
PLA2G10	Group 10 secretory phospholipase A2	3.1	5	4UY1A	1*	1	0	0
TTK	Dual specificity protein kinase TTK	3.1	143	2ZMDA	1*	1	0	0
RET	Proto-oncogene tyrosine-protein kinase receptor Ret	3.1	3522	2IVVA;2X2UA	4*	1	0	3
CCNE1	G1/S-specific cyclin-E1	3	266	1W98B	2	0	1	1
SYT1	Synaptotagmin-1	3	25	2R83A	1	0	0	1
CENPM	Centromere protein M	3	0	4P0TA	1	0	0	1
KIF15	Kinesin-like protein KIF15	3	9	4BN2C	4	1	0	3
F12	Coagulation factor XII	3	212	4BDXA	1	0	0	1
NR5A1	Steroidogenic factor 1	3	215	2A66A;4QK4A	5	0	0	5
HIST1H2BM	Histone H2B type 1-M	3	1	3AV1D	1	0	1	0
FAM83A	Protein FAM83A	3	10	4URJD	1	0	0	1
CASC5	Protein CASC5	3	14	4NF9B	2	0	1	1
HIST3H2BB	Histone H2B type 3-B	2.9	0	3W99D	1	0	1	0
CCNA2	Cyclin-A2	2.9	300	2BPMD	1	0	0	1
PAH	Phenylalanine-4-hydroxylase	2.9	1475	1J8UA	3*	1	0	2
F7	Coagulation factor VII	2.9	135	1WUNH	1*	1	0	0
PACSIN1	Protein kinase C and casein kinase substrate in neurons protein 1	2.9	3	3HAHB	1	0	0	1
CENPE	Centromere-associated protein E	2.9	29	1T5CA	3	1	0	2
FGB	Fibrinogen beta chain	2.9	21	3GHGE	1	0	0	1
APLP1	Amyloid-like protein 1	2.9	19	3PMRA	1	0	0	1
FN1	Fibronectin	2.9	6799	3M7PA	3	0	0	3
CAPS	Calcyphosin	2.9	613	3E3RA	1	0	0	1
DDX53	Probable ATP-dependent RNA helicase DDX53	2.8	17	3IUYB	2	0	0	2
EME1	Crossover junction endonuclease EME1	2.8	42	4P0QB	1	0	0	1
APOA1	Apolipoprotein A-I	2.8	489	2A01C	6	0	0	6
KIF23	Kinesin-like protein KIF23	2.8	24	3VHXH	1	0	0	1
RAD51	DNA repair protein RAD51 homolog 1	2.8	1451	1N0WA	2	0	0	2
ELAVL2	ELAV-like protein 2	2.8	24	1G2EA	1	0	0	1
RLBP1	Retinaldehyde-binding protein 1	2.8	0	4CJ6A	4	0	0	4
CBX2	Chromobox protein homolog 2	2.8	16	3H91A	1	0	1	0
IL21R	Interleukin-21 receptor	2.8	263	3TGXM	1	0	1	0
ACMSD	2-amino-3-carboxymuconate-6-semialdehyde decarboxylase	2.8	4	2WM1A	3	1	1	1
AKR7A3	Aflatoxin B1 aldehyde reductase member 3	2.7	10	2CLPJ	1	1	0	0
CKS2	Cyclin-dependent kinases regulatory subunit 2	2.7	51	1CKSC	1	0	0	1
KIF18A	Kinesin-like protein KIF18A	2.7	15	3LREB	4	1	0	3
HIST1H2BD	Histone H2B type 1-D	2.7	1	3AV1D	1	0	1	0
CFB	Complement factor B	2.7	94	2OK5A	8	1	0	7
MMP12	Macrophage metalloelastase	2.6	110	3BA0A	3	0	0	3
CCNB1	G2/mitotic-specific cyclin-B1	2.6	2154	2B9RB	1	0	0	1
PNMT	Phenylethanolamine N-methyltransferase	2.6	82	4MIKA	1*	1	0	0
KIF11	Kinesin-like protein KIF11	2.6	139	4AP0A	3	1	0	2
RGS7	Regulator of G-protein signaling 7	2.6	6	2A72A	1	0	1	0
PAX2	Paired box protein Pax-2	2.6	236	1K78A	1	0	0	1
MIOX	Inositol oxygenase	2.6	2	2IBNA	1	1	0	0
TH	Tyrosine 3-monooxygenase	2.6	1360162	2XSNB	2	1	1	0
GIF	Gastric intrinsic factor	2.6	310	2PMVD	4	0	1	3
FGFR3	Fibroblast growth factor receptor 3	2.6	752	4K33A	1	1	0	0
F2	Prothrombin	2.6	3275	4NZQA	6	0	0	6
ADORA2A	Adenosine receptor A2a	2.5	10	3VG9A	5	0	1	4
LINGO1	Leucine-rich repeat and immunoglobulin-like domain-containing nogo receptor-interacting protein 1	2.5	4	2ID5D	2	0	1	1
CTSE	Cathepsin E	2.5	70	1TZSA	2	1	1	0
HIST1H2BL	Histone H2B type 1-L	2.5	2	3AV1D	1	0	1	0
ADAM8	Disintegrin and metalloproteinase domain-containing protein 8	2.5	46	4DD8A	1*	1	0	0
LCN1	Lipocalin-1	2.5	9	3EYCA	1	0	1	0
EZH2	Histone-lysine N-methyltransferase EZH2	2.4	1168	4MI0A	2	0	0	2
PYCR1	Pyrroline-5-carboxylate reductase 1, mitochondrial	2.4	7	2IZZA	1	1	0	0
TGM3	Protein-glutamine gamma-glutamyltransferase E	2.4	23	1NUDB	6	1	0	5
PROZ	Vitamin K-dependent protein Z	2.4	3	3F1SB	4	0	1	3
APOH	Beta-2-glycoprotein 1	2.4	16	4JHSA	1	0	0	1
SDS	L-serine dehydratase/L-threonine deaminase	2.4	4843	1P5JA	1	1	0	0
HIST1H2BJ	Histone H2B type 1-J	2.4	1	3W99D	1	0	1	0
CDC25A	M-phase inducer phosphatase 1	2.4	533	1C25A	2	0	0	2
MMP3	Stromelysin-1	2.4	363	1SLMA	4*	1	0	3
HDC	Histidine decarboxylase	2.3	745	4E1OF	3	1	1	2
HPN	Serine protease hepsin	2.3	167	3T2NB	5*	1	0	4
CHP2	Calcineurin B homologous protein 2	2.3	10	2BECA	3	0	2	1
MAD2L1	Mitotic spindle assembly checkpoint protein MAD2A	2.3	216	2V64F	1	0	1	0
ARHGAP11A	Rho GTPase-activating protein 11A	2.3	1	3EAPA	3	0	1	2
GINS2	DNA replication complex GINS protein PSF2	2.3	10	2Q9QA	1	0	1	0
HIST1H2BC	Histone H2B type 1-C/E/F/G/I	2.3	1	3AV1D	1	0	1	0
IL12B	Interleukin-12 subunit beta	2.3	43	4OE8A	1	0	1	0
AIM2	Interferon-inducible protein AIM2	2.3	67	3RN5D	1	0	0	1
TYMS	Thymidylate synthase	2.3	3396	1HW4A	2*	1	0	1
RHCG	Ammonium transporter Rh type C	2.2	10	3HD6A	5	0	3	2
AMY2A	Pancreatic alpha-amylase	2.2	17	3IJ9A	1*	1	0	0
TPH1	Tryptophan 5-hydroxylase 1	2.2	18	1MLWA	2*	1	0	1
BRDT	Bromodomain testis-specific protein	2.2	19	4FLPB	1*	0	0	1
KPNA2	Importin subunit alpha-1	2.2	47	4E4VB	1	0	0	1
CRABP2	Cellular retinoic acid-binding protein 2	2.2	48	3FA9B	1*	0	0	1
IDO1	Indoleamine 2,3-dioxygenase 1	2.2	96	4PK5A	3	1	0	2
GSTA2	Glutathione S-transferase A2	2.2	44	1USBB	2	1	0	1
BLM	Bloom syndrome protein	2.2	1115	4CDGA	5	1	0	4
CLIC3	Chloride intracellular channel protein 3	2.2	10	3KJYB	1	0	0	1
IFNG	Interferon gamma	2.1	14526	3BESL	1	0	0	1
HIST1H2BK	Histone H2B type 1-K	2.1	0	3AV1D	1	0	1	0
GINS4	DNA replication complex GINS protein SLD5	2.1	3	2E9XH	2	0	1	1
CBS	Cystathionine beta-synthase	2.1	438	4UUUA;4COOB	4	0	0	4
HIST2H2BE	Histone H2B type 2-E	2	1	3W99D	1	0	1	0
THPO	Thrombopoietin	2	882	1V7MX	1	0	0	1
CCL17	C-C motif chemokine 17	2	149	1NR4D	1	0	0	1
GSG2	Serine/threonine-protein kinase haspin	2	7	3DLZA	1*	1	1	0
ATAD2	ATPase family AAA domain-containing protein 2	2	35	4QSPA	1*	0	1	0
TYMP	Thymidine phosphorylase	2	1247	2WK5B	4*	1	0	3
CYP2B6	Cytochrome P450 2B6	2	203	3QOAA	4	0	0	4
CASKIN1	Caskin-1	2	2	3SEIA	1	0	0	1
ERBB2	Receptor tyrosine-protein kinase erbB-2	2	19609	3MZWA;3PP0B	3*	1	0	2
NME1	Nucleoside diphosphate kinase A	2	857	3L7UB	2	1	0	1
ZG16B	Zymogen granule protein 16 homolog B	2	2	3AQGA	1	0	0	1
ARHGAP11B	Rho GTPase-activating protein 11B	2	0	3EAPA	3	0	1	2
MIF	Macrophage migration inhibitory factor	2	631	3HOFC	1*	1	0	0
IL21	Interleukin-21	2	283	3TGXL	1	0	0	1
TTBK1	Tau-tubulin kinase 1	1.9	1	4BTJA	2*	1	0	1
COMTD1	Catechol O-methyltransferase domain-containing protein 1	1.9	0	2AVDB	3	1	0	2
TNFSF4	Tumor necrosis factor ligand superfamily member 4	1.9	113	2HEVF	1	0	0	1
CAPN13	Calpain-13	1.9	0	2I7AA	3	0	0	3
SEC14L4	SEC14-like protein 4	1.9	0	4TLGA	7	0	0	7
HGFAC	Hepatocyte growth factor activator	1.9	103	1YBWA	1	0	0	1
FGFR4	Fibroblast growth factor receptor 4	1.9	258	4QQ5A	2*	1	0	1
TSTA3	GDP-L-fucose synthase	1.9	8	4BL5A	1	1	0	0
PCSK9	Proprotein convertase subtilisin/kexin type 9	1.9	34	2P4EA	5	1	2	3
GATA3	Trans-acting T-cell-specific transcription factor GATA-3	1.9	434	4HC9A	1	0	0	1
SH3GL2	Endophilin-A1	1.9	23	2D4CB	2	0	1	1
DDC	Aromatic-L-amino-acid decarboxylase	1.9	325	3RBFA	4	1	1	2
PLK4	Serine/threonine-protein kinase PLK4	1.9	101	3COKA	3*	1	0	2
GRB14	Growth factor receptor-bound protein 14	1.9	30	4K81G	6	0	1	5
HIST1H2BB	Histone H2B type 1-B	1.8	0	3W99D	1	0	1	0
SULT4A1	Sulfotransferase 4A1	1.8	6	1ZD1A	1	1	0	0
TJP3	Tight junction protein ZO-3	1.8	5	3KFVA	3	0	0	3
SORD	Sorbitol dehydrogenase	1.8	47	1PL8A	2	1	0	1
MX1	Interferon-induced GTP-binding protein Mx1	1.8	133	3LJBB;4P4UA	4	1	0	3
PLAUR	Urokinase plasminogen activator surface receptor	1.8	926	1YWHM	3	0	2	1
CLEC4D	C-type lectin domain family 4 member D	1.8	4	3WHDC	1	0	0	1
CA12	Carbonic anhydrase 12	1.8	52	1JCZB	3*	1	0	2
PTPRN	Receptor-type tyrosine-protein phosphatase-like N	1.8	20	2I1YB	2	0	0	2
CA7	Carbonic anhydrase 7	1.8	12	3MDZA	1	1	0	0
IL11	Interleukin-11	1.8	407	4MHLA	2	0	0	2
ESR1	Estrogen receptor	1.8	23933	2OCFA	3	0	1	2
PKLR	Pyruvate kinase PKLR	1.7	9	4IMAA	6	1	2	4
GALE	UDP-glucose 4-epimerase	1.7	984	1EK6B	1	1	0	0
CKMT1A	Creatine kinase U-type, mitochondrial	1.7	1	1QK1G	1	1	0	0
SEC14L3	SEC14-like protein 3	1.7	1	4UYBA	4	0	0	4
SERPINA12	Serpin A12	1.7	9	4IF8A	3	0	0	3
HS3ST3A1	Heparan sulfate glucosamine 3-O-sulfotransferase 3A1	1.7	2	1T8UB	1	1	0	0
AKR7L	Aflatoxin B1 aldehyde reductase member 4	1.7	0	2CLPJ	1	1	0	0
FEN1	Flap endonuclease 1	1.7	148	1UL1Y	3	0	1	2
HCN4	Potassium/sodium hyperpolarization-activated cyclic nucleotide-gated channel 4	1.7	2	3OTFA	1	1	0	0
FAP	Prolyl endopeptidase FAP	1.7	2296	1Z68A	7	0	0	7
RASGRP1	RAS guanyl-releasing protein 1	1.7	54	4L9MA	6	0	0	6
NAT2	Arylamine N-acetyltransferase 2	1.7	769	2PFRB	1	1	0	0
RCC1	Regulator of chromosome condensation	1.7	56	1A12A	1	0	0	1
DDX39A	ATP-dependent RNA helicase DDX39A	1.7	8	1XTIA	2	1	1	0
PIWIL1	Piwi-like protein 1	1.6	39	3O3IX	1	0	0	1
AZU1	Azurocidin	1.6	13	1AE5A	1	1	0	0
SERPINB2	Plasminogen activator inhibitor 2	1.6	285	2ARQA	4	0	0	4
FABP7	Fatty acid-binding protein, brain	1.6	123	1FE3A	1	0	0	1
GGH	Gamma-glutamyl hydrolase	1.6	244	1L9XA	2	1	0	1
HIST1H2BN	Histone H2B type 1-N	1.6	1	3AV1D	1	0	1	0
MGAM	Maltase-glucoamylase, intestinal	1.6	5	3L4VA;3TONB	15*	2	0	13
SERPINC1	Antithrombin-III	1.6	782	4EB1I	4	0	0	4
TAP1	Antigen peptide transporter 1	1.6	413	1JJ7A	1	0	0	1
PRDM9	Histone-lysine N-methyltransferase PRDM9	1.6	9	4IJDA	2	0	0	2
RAB31	Ras-related protein Rab-31	1.6	16	2FG5A	1	1	0	0
GZMB	Granzyme B	1.6	1487	1IAUA	1*	1	0	0
CD1B	T-cell surface glycoprotein CD1b	1.6	42	3T8XC	2	0	0	2
PRSS8	Prostasin	1.6	56	3E0NB	1*	1	0	0
DPP3	Dipeptidyl peptidase 3	1.6	2	3FVYA	6	1	0	5
QPRT	Nicotinate-nucleotide pyrophosphorylase [carboxylating]	1.6	2	3LARE	1	1	0	0
SULT1E1	Estrogen sulfotransferase	1.6	122	1G3MA	1	1	0	0
HS3ST5	Heparan sulfate glucosamine 3-O-sulfotransferase 5	1.6	0	3BD9A	1	1	0	0
ACE2	Angiotensin-converting enzyme 2	1.6	45	1R42A	3	1	0	2
NME3	Nucleoside diphosphate kinase 3	1.6	6	1ZS6D	1	1	0	0
RND1	Rho-related GTP-binding protein Rho6	1.6	20	3Q3JB	1	1	0	0
APCS	Serum amyloid P-component	1.6	1242	1LGNE	1	0	0	1
PTPRN2	Receptor-type tyrosine-protein phosphatase N2	1.6	14	2QEPA	1	0	0	1
DUSP15	Dual specificity protein phosphatase 15	1.6	1	1YZ4A	1	0	0	1
RHEBL1	GTPase RhebL1	1.6	7	3OESA	2	1	0	1
CRYM	Ketimine reductase mu-crystallin	1.5	4	2I99B	1	1	0	0
MST1R	Macrophage-stimulating protein receptor	1.5	29	4QT8B;3PLSA	6	1	0	5
OAS1	2'-5'-oligoadenylate synthase 1	1.5	35	4IG8A	2	1	0	1
CHEK1	Serine/threonine-protein kinase Chk1	1.5	75	2R0UA	1*	1	0	0
HIST2H2BF	Histone H2B type 2-F	1.5	1	3AV1D	1	0	1	0
SMYD3	Histone-lysine N-methyltransferase SMYD3	1.5	59	3RU0A	3	1	0	2
CPN1	Carboxypeptidase N catalytic chain	1.5	0	2NSMA	2	0	0	2
GZMK	Granzyme K	1.5	15	1MZDA	1	1	0	0
FKBP4	Peptidyl-prolyl cis-trans isomerase FKBP4	1.5	48	1P5QB	1	0	0	1
CPA4	Carboxypeptidase A4	1.5	6	2BOAA	2	1	0	1
RAB25	Ras-related protein Rab-25	1.5	68	2OILA	1	1	0	0
KIF22	Kinesin-like protein KIF22	1.5	9	3BFNA	4	1	0	3
CBLC	E3 ubiquitin-protein ligase CBL-C	1.5	18	3VRQA	1	0	0	1
OSM	Oncostatin-M	1.5	547	1EVSA	1	0	0	1
C4A	Complement C4-A	1.5	54	1HZFA	1	0	0	1

## Sheet: COAD
Protein		Cancer		Structure
Symbol	Name	FC	Cancer Publications	PDB	All	ENZ	PPI	OTH
PPBP	Platelet basic protein	9.7	23	1F9PA	1	0	0	1
KLK7	Kallikrein-7	9	71	3BSQA	2	1	0	1
TCN1	Transcobalamin-1	8.1	9	4KKJA	4	0	0	4
MMP7	Matrilysin	7.9	619	2Y6DA	1*	1	0	0
SERPINB4	Serpin B4	7	7	2ZV6A	4	0	0	4
CA9	Carbonic anhydrase 9	6.8	872	3IAIC	3	1	0	2
ORM1	Alpha-1-acid glycoprotein 1	6.8	25	3KQ0A	1	0	0	1
AQP5	Aquaporin-5	6.7	68	3D9SD	2	0	0	2
SERPINB3	Serpin B3	6.7	33	2ZV6A	4	0	0	4
PAH	Phenylalanine-4-hydroxylase	6.7	1475	1J8UA	3*	1	0	2
MMP8	Neutrophil collagenase	6.5	53	1BZSA	2*	1	0	1
MAGEA4	Melanoma-associated antigen 4	6.3	142	2WA0A	1	0	0	1
GAD1	Glutamate decarboxylase 1	6.2	27	3VP6B	3	1	1	1
PGC	Gastricsin	6.2	505	1HTRB	2	1	2	0
AKR1C4	Aldo-keto reductase family 1 member C4	6.1	25	2FVLC	2	1	0	1
MMP13	Collagenase 3	6	317	4FVLA	2	0	1	1
UGT2B4	UDP-glucuronosyltransferase 2B4	5.9	26	2O6LA	1	0	0	1
INHBA	Inhibin beta A chain	5.7	43	1S4YB	1	0	0	1
TRIM72	Tripartite motif-containing protein 72	5.6	0	3KB5A	1	0	0	1
CA6	Carbonic anhydrase 6	5.5	10	3FE4A	1	1	0	0
CEL	Bile salt-activated lipase	5.4	310	1F6WA	4	1	0	3
PIWIL1	Piwi-like protein 1	5.3	39	3O3IX	1	0	0	1
EPHA8	Ephrin type-A receptor 8	5.3	14	3KULB	3	1	0	2
DDX53	Probable ATP-dependent RNA helicase DDX53	5.1	17	3IUYB	2	0	0	2
TBX5	T-box transcription factor TBX5	4.9	24	2X6VB	1	0	1	0
MMP3	Stromelysin-1	4.8	363	1SLMA	4*	1	0	3
IL11	Interleukin-11	4.7	407	4MHLA	2	0	0	2
SEC14L4	SEC14-like protein 4	4.7	0	4TLGA	7	0	0	7
FOLR1	Folate receptor alpha	4.6	215	4LRHH	2	0	0	2
PGLYRP3	Peptidoglycan recognition protein 3	4.5	1	2APHA	1	0	0	1
SERPINB2	Plasminogen activator inhibitor 2	4.5	285	2ARQA	4	0	0	4
MMP1	Interstitial collagenase	4.4	533	1SU3A	3	0	0	3
KLK5	Kallikrein-5	4.4	73	2PSYA	1	0	0	1
NPC1L1	Niemann-Pick C1-like protein 1	4.3	14	3QNTA	2	0	0	2
TBX4	T-box transcription factor TBX4	4.3	9	2X6VB	1	0	1	0
PKP1	Plakophilin-1	4.2	46	1XM9A	1	0	0	1
GIF	Gastric intrinsic factor	4.2	310	2PMVD	4	0	1	3
CPA4	Carboxypeptidase A4	4.1	6	2BOAA	2	1	0	1
LIPF	Gastric triacylglycerol lipase	4.1	3	1HLGA	3	0	0	3
ACMSD	2-amino-3-carboxymuconate-6-semialdehyde decarboxylase	4	4	2WM1A	3	1	1	1
MIOX	Inositol oxygenase	4	2	2IBNA	1	1	0	0
WIF1	Wnt inhibitory factor 1	4	197	2YGPA	1	0	0	1
CBX2	Chromobox protein homolog 2	4	16	3H91A	1	0	1	0
SERPIND1	Heparin cofactor 2	3.9	5	1JMOA	5	0	0	5
FAP	Prolyl endopeptidase FAP	3.9	2296	1Z68A	7	0	0	7
ANXA8	Annexin A8	3.9	2071	1W45B	1	0	0	1
FGB	Fibrinogen beta chain	3.8	21	3GHGE	1	0	0	1
CKMT2	Creatine kinase S-type, mitochondrial	3.8	0	2GL6D	3	1	0	2
CPN1	Carboxypeptidase N catalytic chain	3.8	0	2NSMA	2	0	0	2
IL23A	Interleukin-23 subunit alpha	3.7	39	4OE8B	1	0	1	0
SERPINB5	Serpin B5	3.7	425	1XU8A	3	0	0	3
SERPINA7	Thyroxine-binding globulin	3.7	109	2CEOB	3	0	0	3
F2	Prothrombin	3.7	3275	4NZQA	6	0	0	6
HBE1	Hemoglobin subunit epsilon	3.7	5	1A9WF	1	0	0	1
GLS2	Glutaminase liver isoform, mitochondrial	3.6	16	4BQMA	1	0	0	1
AQP2	Aquaporin-2	3.4	29	4NEFA	2	0	0	2
ORM2	Alpha-1-acid glycoprotein 2	3.3	15	3APUB	1*	0	0	1
F7	Coagulation factor VII	3.2	135	1WUNH	1*	1	0	0
CRP	C-reactive protein	3.1	5207	3PVOD	1	0	0	1
HOGA1	4-hydroxy-2-oxoglutarate aldolase, mitochondrial	3.1	0	3S5OA	1	1	1	0
TH	Tyrosine 3-monooxygenase	3.1	1360162	2XSNB	2	1	1	0
AZGP1	Zinc-alpha-2-glycoprotein	3.1	67	1T80A	1	0	0	1
LGR5	Leucine-rich repeat-containing G-protein coupled receptor 5	3.1	304	4KNGB	4	0	0	4
LCN1	Lipocalin-1	3	9	3EYCA	1	0	1	0
SERPINA10	Protein Z-dependent protease inhibitor	3	11	4AJUA	5	0	0	5
S100A5	Protein S100-A5	3	13	4DIRB	2	1	0	1
CALML3	Calmodulin-like protein 3	2.9	5	1GGZA	2	0	0	2
CHI3L1	Chitinase-3-like protein 1	2.9	194	1HJVA	2	1	0	1
SULT2B1	Sulfotransferase family cytosolic 2B member 1	2.9	20	1Q1QA	4	1	0	3
PSAT1	Phosphoserine aminotransferase	2.9	24	3E77C	2	1	0	1
SULT1C2	Sulfotransferase 1C2	2.8	8	3BFXB	2	1	1	0
CYP17A1	Steroid 17-alpha-hydroxylase/17,20 lyase	2.8	750	4NKZB	5	0	1	4
RHCG	Ammonium transporter Rh type C	2.8	10	3HD6A	5	0	3	2
PCSK9	Proprotein convertase subtilisin/kexin type 9	2.8	34	2P4EA	5	1	2	3
TP73	Tumor protein p73	2.7	149	3VD0D	2	0	0	2
THBS2	Thrombospondin-2	2.7	129	1YO8A	2	0	0	2
FAM83A	Protein FAM83A	2.6	10	4URJD	1	0	0	1
PAX2	Paired box protein Pax-2	2.6	236	1K78A	1	0	0	1
MMP10	Stromelysin-2	2.5	90	4ILWF	1	0	1	0
HPN	Serine protease hepsin	2.5	167	3T2NB	5*	1	0	4
HCN1	Potassium/sodium hyperpolarization-activated cyclic nucleotide-gated channel 1	2.5	8	3U10A	2	0	0	2
DUSP15	Dual specificity protein phosphatase 15	2.5	1	1YZ4A	1	0	0	1
HGFAC	Hepatocyte growth factor activator	2.5	103	1YBWA	1	0	0	1
PRL	Prolactin	2.5	10630	2Q98A	2	0	0	2
RNF43	E3 ubiquitin-protein ligase RNF43	2.4	58	4KNGF	2	0	0	2
CNDP1	Beta-Ala-His dipeptidase	2.4	6	3DLJA	2	0	1	1
REN	Renin	2.4	7523	4AMTA	2*	1	2	0
IL5	Interleukin-5	2.4	536	3VA2B	2	0	2	0
ASB9	Ankyrin repeat and SOCS box protein 9	2.3	5	3ZNGA	1	0	0	1
SERPINE1	Plasminogen activator inhibitor 1	2.3	1722	1C5GA	1	1	0	0
AMBP	Protein AMBP	2.3	15	4ES7A	1	0	0	1
LCN2	Neutrophil gelatinase-associated lipocalin	2.3	334	3HWGA	1	0	0	1
TDO2	Tryptophan 2,3-dioxygenase	2.3	51	4PW8F	2	1	1	1
ULBP3	NKG2D ligand 3	2.3	47	1KCGC	1	0	0	1
CDC25B	M-phase inducer phosphatase 2	2.2	250	1QB0A	2	0	0	2
PLAU	Urokinase-type plasminogen activator	2.2	3633	2VNTD	1*	1	0	0
ACBD7	Acyl-CoA-binding domain-containing protein 7	2.2	0	3EPYB	1	0	1	0
UHRF1	E3 ubiquitin-protein ligase UHRF1	2.1	112	4GY5B;2PB7A	2	1	0	1
GZMB	Granzyme B	2.1	1487	1IAUA	1*	1	0	0
TIMP1	Metalloproteinase inhibitor 1	2.1	323	1UEAB	2	0	0	2
MET	Hepatocyte growth factor receptor	2	18003	2UZXD;3C1XA	10*	1	0	9
LIF	Leukemia inhibitory factor	2	1191	1PVHB	1	0	0	1
GCKR	Glucokinase regulatory protein	2	14	4OLHA	6	0	0	6
HECW1	E3 ubiquitin-protein ligase HECW1	2	5	3L4HA	1	0	0	1
EPHB3	Ephrin type-B receptor 3	2	52	3ZFYA;3P1IC	3	0	1	2
OTUB2	Ubiquitin thioesterase OTUB2	2	2	4FJVC	1	0	1	0
RHEBL1	GTPase RhebL1	1.9	7	3OESA	2	1	0	1
CECR2	Cat eye syndrome critical region protein 2	1.9	2	3NXBB	1	0	0	1
EME1	Crossover junction endonuclease EME1	1.9	42	4P0QB	1	0	0	1
ALDH4A1	Delta-1-pyrroline-5-carboxylate dehydrogenase, mitochondrial	1.9	7	3V9IA	1	1	0	0
SEC14L2	SEC14-like protein 2	1.9	14	1OLMC	5	0	0	5
ATAD2	ATPase family AAA domain-containing protein 2	1.9	35	4QSPA	1*	0	1	0
OSM	Oncostatin-M	1.9	547	1EVSA	1	0	0	1
ANXA8L2	Annexin A8-like protein 2	1.8	0	1W45B	1	0	0	1
SPHK1	Sphingosine kinase 1	1.8	306	4L02B	1	1	0	0
PYCR1	Pyrroline-5-carboxylate reductase 1, mitochondrial	1.8	7	2IZZA	1	1	0	0
MST1	Hepatocyte growth factor-like protein	1.8	180	4QT8D	2	0	0	2
CTSV	Cathepsin L2	1.8	8	3KFQB	1	1	1	0
SNAI1	Zinc finger protein SNAI1	1.8	165	3W5KB	2	0	0	2
PKMYT1	Membrane-associated tyrosine- and threonine-specific cdc2-inhibitory kinase	1.8	13	3P1AA	2	1	0	1
SYN3	Synapsin-3	1.8	11	2P0AA	2	1	0	1
CENPE	Centromere-associated protein E	1.8	29	1T5CA	3	1	0	2
NME1	Nucleoside diphosphate kinase A	1.8	857	3L7UB	2	1	0	1
EXO1	Exonuclease 1	1.8	171	3QEBZ	3	0	0	3
PDE10A	cAMP and cAMP-inhibited cGMP 3',5'-cyclic phosphodiesterase 10A	1.7	6	4DFFA;2ZMFB	5	1	1	3
GPT2	Alanine aminotransferase 2	1.7	3	3IHJA	5	1	0	4
PHGDH	D-3-phosphoglycerate dehydrogenase	1.7	31	2G76B	1	1	0	0
AURKA	Aurora kinase A	1.7	655	2J4ZB	2*	1	0	1
ANXA3	Annexin A3	1.7	68	1AIIA	3	0	0	3
DDIT4	DNA damage-inducible transcript 4 protein	1.7	77	3LQ9A	2	0	0	2
SORD	Sorbitol dehydrogenase	1.7	47	1PL8A	2	1	0	1
CRABP2	Cellular retinoic acid-binding protein 2	1.7	48	3FA9B	1*	0	0	1
NEK2	Serine/threonine-protein kinase Nek2	1.7	113	2XK4A	3*	1	0	2
ADAT2	tRNA-specific adenosine deaminase 2	1.7	0	3DH1A	2	1	1	0
IMPDH1	Inosine-5'-monophosphate dehydrogenase 1	1.7	14	1JCNB	4	1	0	3
TOP2A	DNA topoisomerase 2-alpha	1.7	355	4R1FA;4FM9A	8	2	0	6
HIST3H2BB	Histone H2B type 3-B	1.7	0	3W99D	1	0	1	0
RIPK2	Receptor-interacting serine/threonine-protein kinase 2	1.6	34	4C8BB	1*	1	0	0
SPARC	SPARC	1.6	751	1NUBA	2	0	0	2
KAT2A	Histone acetyltransferase KAT2A	1.6	20	1Z4RA;3D7CA	2	1	0	1
PSPH	Phosphoserine phosphatase	1.6	43	1L8OA	1	1	0	0
PTPRO	Receptor-type tyrosine-protein phosphatase O	1.6	31	2G59A	1	0	0	1
FSCN1	Fascin	1.6	374	3P53B	2	0	0	2
MAD2L1	Mitotic spindle assembly checkpoint protein MAD2A	1.6	216	2V64F	1	0	1	0
CCNE1	G1/S-specific cyclin-E1	1.6	266	1W98B	2	0	1	1
MMP12	Macrophage metalloelastase	1.6	110	3BA0A	3	0	0	3
BUB1	Mitotic checkpoint serine/threonine-protein kinase BUB1	1.6	378	4R8QA	4	1	0	3
CKS2	Cyclin-dependent kinases regulatory subunit 2	1.6	51	1CKSC	1	0	0	1
BIRC5	Baculoviral IAP repeat-containing protein 5	1.6	3230	3UEHA	1	0	0	1
KIF18A	Kinesin-like protein KIF18A	1.6	15	3LREB	4	1	0	3
KIF23	Kinesin-like protein KIF23	1.6	24	3VHXH	1	0	0	1
IL17F	Interleukin-17F	1.6	33	1JPYA	1	0	1	0
KIF2C	Kinesin-like protein KIF2C	1.6	41	2HEHA	2	1	0	1
RRM2	Ribonucleoside-diphosphate reductase subunit M2	1.6	142	2UW2A	2	0	0	2
COL3A1	Collagen alpha-1(III) chain	1.6	39	4AE2A	1	0	0	1
SERPINE2	Glia-derived nexin	1.6	68	4DY7C	2	0	0	2
CLIC3	Chloride intracellular channel protein 3	1.6	10	3KJYB	1	0	0	1
C2	Complement C2	1.6	2893	2I6SA;3ERBA	6	1	0	5
GAPDHS	Glyceraldehyde-3-phosphate dehydrogenase, testis-specific	1.6	3	3PFWO	1	1	0	0
CCNB1	G2/mitotic-specific cyclin-B1	1.6	2154	2B9RB	1	0	0	1
MELK	Maternal embryonic leucine zipper kinase	1.6	61	4UMUA	4*	1	0	3
QPCT	Glutaminyl-peptide cyclotransferase	1.5	13	3SI0A	1	0	0	1
AHCY	Adenosylhomocysteinase	1.5	98	3NJ4D	3	1	1	1
MMP9	Matrix metalloproteinase-9	1.5	6042	1ITVA;1L6JA	6	1	0	5
PTPN13	Tyrosine-protein phosphatase non-receptor type 13	1.5	104	1WCHA	1	0	0	1
SHMT2	Serine hydroxymethyltransferase, mitochondrial	1.5	11	3OU5A	4	0	1	3
GPSM2	G-protein-signaling modulator 2	1.5	10	3SF4A	3	0	3	0
TNFSF4	Tumor necrosis factor ligand superfamily member 4	1.5	113	2HEVF	1	0	0	1
PUS1	tRNA pseudouridine synthase A, mitochondrial	1.5	1	4J37A	2	1	0	1
CYP19A1	Aromatase	1.5	6222	3EQMA	3	0	0	3

## Sheet: GBM
Protein		Cancer		Structure
Symbol	Name	FC	Cancer Publications	PDB	All	ENZ	PPI	OTH
LTF	Lactotransferrin	8.8	77	2BJJX	8	0	0	8
PLA2G2A	Phospholipase A2, membrane associated	8.2	79	1POEA	1*	1	0	0
MMP9	Matrix metalloproteinase-9	7.8	6042	1ITVA;1L6JA	6	1	0	5
MELK	Maternal embryonic leucine zipper kinase	7.8	61	4UMUA	4*	1	0	3
TOP2A	DNA topoisomerase 2-alpha	7.8	355	4R1FA;4FM9A	8	2	0	6
RRM2	Ribonucleoside-diphosphate reductase subunit M2	7.7	142	2UW2A	2	0	0	2
AURKB	Aurora kinase B	7.7	482	4AF3A	2*	1	0	1
HPD	4-hydroxyphenylpyruvate dioxygenase	7.3	604	3ISQA	6	0	2	4
HIST1H2BH	Histone H2B type 1-H	7	0	3AV1D	1	0	1	0
IDO1	Indoleamine 2,3-dioxygenase 1	6.8	96	4PK5A	3	1	0	2
CA9	Carbonic anhydrase 9	6.5	872	3IAIC	3	1	0	2
BUB1	Mitotic checkpoint serine/threonine-protein kinase BUB1	6.3	378	4R8QA	4	1	0	3
COL3A1	Collagen alpha-1(III) chain	6.3	39	4AE2A	1	0	0	1
BIRC5	Baculoviral IAP repeat-containing protein 5	6.3	3230	3UEHA	1	0	0	1
CHI3L1	Chitinase-3-like protein 1	6.3	194	1HJVA	2	1	0	1
KIFC1	Kinesin-like protein KIFC1	5.9	10	2REPA	2	1	0	1
CDC25C	M-phase inducer phosphatase 3	5.9	630	3OP3A	1	0	0	1
TTK	Dual specificity protein kinase TTK	5.9	143	2ZMDA	1*	1	0	0
KIF2C	Kinesin-like protein KIF2C	5.6	41	2HEHA	2	1	0	1
NNMT	Nicotinamide N-methyltransferase	5.6	74	2IIPA	1	1	0	0
MIA	Melanoma-derived growth regulatory protein	5.5	1144	1I1JA	1	0	0	1
EGFR	Epidermal growth factor receptor	5.4	34335	3QWQA;3GOPA	5*	1	0	4
CASC5	Protein CASC5	5.4	14	4NF9B	2	0	1	1
KIF18A	Kinesin-like protein KIF18A	5.4	15	3LREB	4	1	0	3
PKMYT1	Membrane-associated tyrosine- and threonine-specific cdc2-inhibitory kinase	5.3	13	3P1AA	2	1	0	1
EZH2	Histone-lysine N-methyltransferase EZH2	5	1168	4MI0A	2	0	0	2
IQGAP2	Ras GTPase-activating-like protein IQGAP2	5	22	3IEZB	1	0	0	1
FCGR2B	Low affinity immunoglobulin gamma Fc region receptor II-b	5	39	3WJLC	1	0	0	1
CDK4	Cyclin-dependent kinase 4	5	3577	3G33A	3	1	0	2
CYP19A1	Aromatase	4.9	6222	3EQMA	3	0	0	3
KIF23	Kinesin-like protein KIF23	4.9	24	3VHXH	1	0	0	1
CHI3L2	Chitinase-3-like protein 2	4.8	5	4P8XA	2	0	0	2
CENPM	Centromere protein M	4.7	0	4P0TA	1	0	0	1
RAD51	DNA repair protein RAD51 homolog 1	4.7	1451	1N0WA	2	0	0	2
NR5A2	Nuclear receptor subfamily 5 group A member 2	4.6	77	3TX7B;2A66A	5*	0	1	4
EXO1	Exonuclease 1	4.4	171	3QEBZ	3	0	0	3
KIF15	Kinesin-like protein KIF15	4.4	9	4BN2C	4	1	0	3
CCNA2	Cyclin-A2	4.4	300	2BPMD	1	0	0	1
WEE1	Wee1-like protein kinase	4.3	331	1X8BA	1*	1	0	0
GATA3	Trans-acting T-cell-specific transcription factor GATA-3	4.2	434	4HC9A	1	0	0	1
METTL21B	Protein-lysine methyltransferase METTL21B	4.2	0	4QPNA	1	1	0	0
GSG2	Serine/threonine-protein kinase haspin	4.2	7	3DLZA	1*	1	1	0
ANXA2P2	Putative annexin A2-like protein	4.2	0	1W7BA	2	0	0	2
RCC1	Regulator of chromosome condensation	4.2	56	1A12A	1	0	0	1
ENPEP	Glutamyl aminopeptidase	4.1	45	4KX7A	3	1	0	2
ST14	Suppressor of tumorigenicity 14 protein	4.1	93	3NPSA	1*	1	0	0
STEAP3	Metalloreductase STEAP3	4	6	2VNSB	1	1	0	0
MMP2	72 kDa type IV collagenase	4	1676	1CK7A	4	0	0	4
CKS2	Cyclin-dependent kinases regulatory subunit 2	4	51	1CKSC	1	0	0	1
UHRF1	E3 ubiquitin-protein ligase UHRF1	4	112	4GY5B;2PB7A	2	1	0	1
PLK1	Serine/threonine-protein kinase PLK1	4	743	1Q4KB;2OWBA	4*	1	1	2
MMP14	Matrix metalloproteinase-14	3.9	650	3MA2A	1	1	1	0
PLAU	Urokinase-type plasminogen activator	3.9	3633	2VNTD	1*	1	0	0
CA12	Carbonic anhydrase 12	3.9	52	1JCZB	3*	1	0	2
SERPINE1	Plasminogen activator inhibitor 1	3.8	1722	1C5GA	1	1	0	0
GZMA	Granzyme A	3.8	137	1ORFA	1	1	0	0
HS3ST3A1	Heparan sulfate glucosamine 3-O-sulfotransferase 3A1	3.8	2	1T8UB	1	1	0	0
CDK2	Cyclin-dependent kinase 2	3.7	3304	2WXVA	3*	1	0	2
ANXA2	Annexin A2	3.7	486	1W7BA	2	0	0	2
FCGR2C	Low affinity immunoglobulin gamma Fc region receptor II-c	3.7	1	3WJLC	1	0	0	1
NEK2	Serine/threonine-protein kinase Nek2	3.6	113	2XK4A	3*	1	0	2
CBX2	Chromobox protein homolog 2	3.6	16	3H91A	1	0	1	0
FOLR1	Folate receptor alpha	3.6	215	4LRHH	2	0	0	2
SERPINA5	Plasma serine protease inhibitor	3.6	55	2OL2A	3	0	0	3
CDC20	Cell division cycle protein 20 homolog	3.6	291	4GGDB	2*	0	0	2
S100A10	Protein S100-A10	3.5	76	4HRHB	1	0	1	0
HNF4G	Hepatocyte nuclear factor 4-gamma	3.5	13	1LV2A	3	0	0	3
CETP	Cholesteryl ester transfer protein	3.5	61	4EWSA	6	0	0	6
GINS2	DNA replication complex GINS protein PSF2	3.5	10	2Q9QA	1	0	1	0
FN1	Fibronectin	3.5	6799	3M7PA	3	0	0	3
GBP1	Interferon-induced guanylate-binding protein 1	3.5	31	1F5NA	7	0	1	6
TEAD2	Transcriptional enhancer factor TEF-4	3.5	16	3L15A	3	0	0	3
RNASE2	Non-secretory ribonuclease	3.5	6	1K2AA	1	1	1	0
ARHGAP11A	Rho GTPase-activating protein 11A	3.5	1	3EAPA	3	0	1	2
EME1	Crossover junction endonuclease EME1	3.4	42	4P0QB	1	0	0	1
AURKA	Aurora kinase A	3.4	655	2J4ZB	2*	1	0	1
CFI	Complement factor I	3.4	147	2XRCD	7	1	0	6
APOBEC3C	DNA dC->dU-editing enzyme APOBEC-3C	3.4	13	3VM8A	1	0	0	1
SOCS2	Suppressor of cytokine signaling 2	3.4	94	4JGHA	1	0	0	1
CD1D	Antigen-presenting glycoprotein CD1d	3.4	449	3U0PA	1	0	0	1
CLIC1	Chloride intracellular channel protein 1	3.4	49	4K0GA	1	0	0	1
TIMP1	Metalloproteinase inhibitor 1	3.3	323	1UEAB	2	0	0	2
ITGB3	Integrin beta-3	3.3	120	4G1EB	5	0	1	4
ANPEP	Aminopeptidase N	3.3	273	4FYQA	4	1	1	3
PYGL	Glycogen phosphorylase, liver form	3.3	6	2ZB2A	10	1	2	7
SERPINA3	Alpha-1-antichymotrypsin	3.3	795	3DLWA	2	0	0	2
CHEK2	Serine/threonine-protein kinase Chk2	3.2	938	3I6UA	3*	1	0	2
HK3	Hexokinase-3	3.2	57	3HM8C	5	1	0	4
SPARC	SPARC	3.2	751	1NUBA	2	0	0	2
CENPE	Centromere-associated protein E	3.2	29	1T5CA	3	1	0	2
IL10	Interleukin-10	3.2	3290	2H24A	2	0	2	0
PTPN22	Tyrosine-protein phosphatase non-receptor type 22	3.2	23	4J51B	3	0	0	3
KIF11	Kinesin-like protein KIF11	3.2	139	4AP0A	3	1	0	2
ARHGAP11B	Rho GTPase-activating protein 11B	3.1	0	3EAPA	3	0	1	2
C1R	Complement C1r subcomponent	3.1	72	1GPZB	3	1	0	2
GBP3	Guanylate-binding protein 3	3.1	1	2BC9A	3	0	0	3
CCNB1	G2/mitotic-specific cyclin-B1	3.1	2154	2B9RB	1	0	0	1
AR	Androgen receptor	3.1	17960	2PNUA	2*	0	0	2
PPIC	Peptidyl-prolyl cis-trans isomerase C	3	12	2ESLC	1*	1	0	0
NAT1	Arylamine N-acetyltransferase 1	3	361	2IJAA	1	1	0	0
HSPA6	Heat shock 70 kDa protein 6	3	13	3FE1B	1	1	0	0
CASP1	Caspase-1	3	776	3E4CA	2	1	0	1
TLR8	Toll-like receptor 8	3	137	3W3GA	4	0	0	4
FCGR2A	Low affinity immunoglobulin gamma Fc region receptor II-a	3	43	3WJLC	1	0	0	1
CDC25A	M-phase inducer phosphatase 1	3	533	1C25A	2	0	0	2
ITGA5	Integrin alpha-5	3	113	3VI4A	4	0	1	3
SERPINA1	Alpha-1-antitrypsin	3	1973	3NE4A	3	0	0	3
PTPN7	Tyrosine-protein phosphatase non-receptor type 7	3	7	1ZC0A	2	0	0	2
ITGA1	Integrin alpha-1	2.9	25	1PT6B	1	0	0	1
OAS1	2'-5'-oligoadenylate synthase 1	2.9	35	4IG8A	2	1	0	1
LILRB2	Leukocyte immunoglobulin-like receptor subfamily B member 2	2.9	28	4LLAB;2GW5A	2	0	0	2
SLAMF6	SLAM family member 6	2.9	5	2IF7D	2	0	0	2
KYNU	Kynureninase	2.9	16	2HZPA	2	0	0	2
TK1	Thymidine kinase, cytosolic	2.9	222	2ORVB	1*	1	0	0
LY96	Lymphocyte antigen 96	2.9	41	4G8AC	1	0	0	1
HLA-DPA1	HLA class II histocompatibility antigen, DP alpha 1 chain	2.9	24	3WEXC	1	0	1	0
ANXA5	Annexin A5	2.9	1269	2XO3A	6*	0	0	6
BST1	ADP-ribosyl cyclase/cyclic ADP-ribose hydrolase 2	2.9	3	1ISGA	1	1	0	0
RAB32	Ras-related protein Rab-32	2.8	4	4CYMB	1	1	0	0
S100A6	Protein S100-A6	2.8	197	1K8UA	1	0	1	0
ASB9	Ankyrin repeat and SOCS box protein 9	2.8	5	3ZNGA	1	0	0	1
CTSC	Dipeptidyl peptidase 1	2.8	17	3PDFA	2*	1	0	1
NAMPT	Nicotinamide phosphoribosyltransferase	2.8	201	4O0ZB	4*	1	1	2
ARHGAP15	Rho GTPase-activating protein 15	2.7	5	3BYID	1	0	0	1
TP53I3	Quinone oxidoreductase PIG3	2.7	38	2J8ZA	2	1	0	1
HLA-DMA	HLA class II histocompatibility antigen, DM alpha chain	2.7	75	2BC4C	3	0	0	3
GIMAP2	GTPase IMAP family member 2	2.7	0	2XTPA	1	1	0	0
CTSK	Cathepsin K	2.7	238	1BY8A	2	0	0	2
CASP6	Caspase-6	2.7	270	4IYRA	1	1	0	0
HLA-B	HLA class I histocompatibility antigen, B-58 alpha chain	2.7	1201	1A1MA	2	0	0	2
HLA-B	HLA class I histocompatibility antigen, B-78 alpha chain	2.7	1201	1EFXA;1A1MA	5	0	0	5
HLA-B	HLA class I histocompatibility antigen, B-54 alpha chain	2.7	1201	1EFXA;1A1MA	5	0	0	5
HLA-B	HLA class I histocompatibility antigen, B-55 alpha chain	2.7	1201	1EFXA;1A1MA	5	0	0	5
HLA-B	HLA class I histocompatibility antigen, B-52 alpha chain	2.7	1201	1A1MA;3VCLA	3	0	0	3
HLA-B	HLA class I histocompatibility antigen, B-56 alpha chain	2.7	1201	1EFXA;1A1MA	5	0	0	5
HLA-B	HLA class I histocompatibility antigen, B-18 alpha chain	2.7	1201	1A1MA;3VCLA	3	0	0	3
HLA-B	HLA class I histocompatibility antigen, B-15 alpha chain	2.7	1201	1EFXA;1A1MA	5	0	0	5
HLA-B	HLA class I histocompatibility antigen, B-14 alpha chain	2.7	1201	1EFXA;1A1MA	5	0	0	5
HLA-B	HLA class I histocompatibility antigen, B-13 alpha chain	2.7	1201	1A1MA	2	0	0	2
HLA-B	HLA class I histocompatibility antigen, B-38 alpha chain	2.7	1201	1A1MA;3VCLA	3	0	0	3
HLA-B	HLA class I histocompatibility antigen, B-7 alpha chain	2.7	1201	1EFXA;4JQVA	4	0	0	4
HLA-B	HLA class I histocompatibility antigen, B-50 alpha chain	2.7	1201	1A1MA;3VCLA	3	0	0	3
HLA-B	HLA class I histocompatibility antigen, B-44 alpha chain	2.7	1201	1A1MA	2	0	0	2
HLA-B	HLA class I histocompatibility antigen, B-42 alpha chain	2.7	1201	1EFXA;1A1MA	5	0	0	5
HLA-B	HLA class I histocompatibility antigen, B-47 alpha chain	2.7	1201	1A1MA;3VCLA	3	0	0	3
HLA-B	HLA class I histocompatibility antigen, B-46 alpha chain	2.7	1201	1EFXA;1A1MA	5	0	0	5
HLA-B	HLA class I histocompatibility antigen, B-49 alpha chain	2.7	1201	1A1MA	2	0	0	2
HLA-B	HLA class I histocompatibility antigen, B-48 alpha chain	2.7	1201	1A1MA;3VCLA	3	0	0	3
HLA-B	HLA class I histocompatibility antigen, B-45 alpha chain	2.7	1201	1A1MA;3VCLA	3	0	0	3
HLA-B	HLA class I histocompatibility antigen, B-8 alpha chain	2.7	1201	1A1MA;3VCLA	3	0	0	3
HLA-B	HLA class I histocompatibility antigen, B-35 alpha chain	2.7	1201	1EFXA;1A1MA	5	0	0	5
HLA-B	HLA class I histocompatibility antigen, B-40 alpha chain	2.7	1201	1A1MA;3VCLA	3	0	0	3
HLA-B	HLA class I histocompatibility antigen, B-59 alpha chain	2.7	1201	1A1MA;3VCLA	3	0	0	3
HLA-B	HLA class I histocompatibility antigen, B-41 alpha chain	2.7	1201	1A1MA;3VCLA	3	0	0	3
HLA-B	HLA class I histocompatibility antigen, B-53 alpha chain	2.7	1201	1A1MA;3VCLA	3	0	0	3
HLA-B	HLA class I histocompatibility antigen, B-81 alpha chain	2.7	1201	4JQVA;4NT6A	3	0	0	3
HLA-B	HLA class I histocompatibility antigen, B-73 alpha chain	2.7	1201	3BVND	2	0	0	2
HLA-B	HLA class I histocompatibility antigen, B-27 alpha chain	2.7	1201	1A1MA;3VCLA	3	0	0	3
HLA-B	HLA class I histocompatibility antigen, B-39 alpha chain	2.7	1201	1A1MA;3VCLA	3	0	0	3
HLA-B	HLA class I histocompatibility antigen, B-57 alpha chain	2.7	1201	1A1MA	2	0	0	2
HLA-B	HLA class I histocompatibility antigen, B-51 alpha chain	2.7	1201	1A1MA;3VCLA	3	0	0	3
HLA-B	HLA class I histocompatibility antigen, B-37 alpha chain	2.7	1201	1A1MA;3VCLA	3	0	0	3
HLA-B	HLA class I histocompatibility antigen, B-67 alpha chain	2.7	1201	1EFXA;1A1MA	5	0	0	5
HLA-B	HLA class I histocompatibility antigen, B-82 alpha chain	2.7	1201	1A1MA;3VCLA	3	0	0	3
MAD2L1	Mitotic spindle assembly checkpoint protein MAD2A	2.7	216	2V64F	1	0	1	0
TBX2	T-box transcription factor TBX2	2.7	75	1H6FA	1	0	0	1
CTSS	Cathepsin S	2.6	97	2C0YA	1	1	0	0
MASP1	Mannan-binding lectin serine protease 1	2.6	8	4IGDA	2	1	0	1
IDH1	Isocitrate dehydrogenase [NADP] cytoplasmic	2.6	1075	4UMYA	4	1	0	3
EPHB4	Ephrin type-B receptor 4	2.6	199	2VWYA;2HLEA	2*	1	1	0
HMOX1	Heme oxygenase 1	2.6	893	3TGMB	1	1	0	0
DTYMK	Thymidylate kinase	2.6	58	2XX3A	1	1	0	0
FBP1	Fructose-1,6-bisphosphatase 1	2.6	31	2FHYA	2	0	0	2
BARD1	BRCA1-associated RING domain protein 1	2.6	235	3FA2B	2	0	0	2
NXT1	NTF2-related export protein 1	2.6	1	1JKGA	1	0	1	0
MR1	Major histocompatibility complex class I-related gene protein	2.6	54	4PJHC	2	0	0	2
PDIA4	Protein disulfide-isomerase A4	2.6	7	3IDVA	1	1	0	0
C1S	Complement C1s subcomponent	2.6	59	4LORA;4J1YA	2	0	0	2
PROCR	Endothelial protein C receptor	2.6	50	3JTCA	1	0	1	0
FLNA	Filamin-A	2.6	150	2J3SA;3HORB;4M9PA	7	0	0	7
NCF1C	Putative neutrophil cytosol factor 1C	2.5	0	1NG2A;1KQ6A	3	0	3	0
TAP1	Antigen peptide transporter 1	2.5	413	1JJ7A	1	0	0	1
GINS4	DNA replication complex GINS protein SLD5	2.5	3	2E9XH	2	0	1	1
IGFBP4	Insulin-like growth factor-binding protein 4	2.5	174	2DSRG	1	0	1	0
RP2	Protein XRP2	2.5	30	3BH6B	2	0	1	1
RHOC	Rho-related GTP-binding protein RhoC	2.5	324	2GCNA	2	1	1	0
HTRA3	Serine protease HTRA3	2.5	24	2P3WA	1	0	0	1
CAPG	Macrophage-capping protein	2.5	50	1JHWA	2	0	0	2
PTPRZ1	Receptor-type tyrosine-protein phosphatase zeta	2.5	52	3S97B	2	1	0	1
TRIM21	E3 ubiquitin-protein ligase TRIM21	2.4	12	2IWGE	1	0	1	0
UPP1	Uridine phosphorylase 1	2.4	11	3EUFA	3	1	1	1
MYD88	Myeloid differentiation primary response protein MyD88	2.4	649	4EO7A	1	0	0	1
HLA-A	HLA class I histocompatibility antigen, A-24 alpha chain	2.4	4228	4NQXC;2BCKD;3MRKA	4	0	0	4
HLA-A	HLA class I histocompatibility antigen, A-11 alpha chain	2.4	4228	4NQXC;3MRHA;2BCKD	4	0	0	4
HLA-A	HLA class I histocompatibility antigen, A-69 alpha chain	2.4	4228	3MRKA;3W0WA	3	0	0	3
HLA-A	HLA class I histocompatibility antigen, A-32 alpha chain	2.4	4228	2BCKD;3MRKA	3	0	0	3
HLA-A	HLA class I histocompatibility antigen, A-80 alpha chain	2.4	4228	4NQXC	1	0	0	1
HLA-A	HLA class I histocompatibility antigen, A-3 alpha chain	2.4	4228	4NQXC;3MRHA;2BCKD	4	0	0	4
HLA-A	HLA class I histocompatibility antigen, A-74 alpha chain	2.4	4228	4NQXC;3MRKA	2	0	0	2
HLA-A	HLA class I histocompatibility antigen, A-26 alpha chain	2.4	4228	4NQXC;3MRKA	2	0	0	2
HLA-A	HLA class I histocompatibility antigen, A-29 alpha chain	2.4	4228	4NQXC;3MRKA	2	0	0	2
HLA-A	HLA class I histocompatibility antigen, A-43 alpha chain	2.4	4228	4NQXC;3MRKA	2	0	0	2
HLA-A	HLA class I histocompatibility antigen, A-66 alpha chain	2.4	4228	4NQXC;3MRKA	2	0	0	2
HLA-A	HLA class I histocompatibility antigen, A-36 alpha chain	2.4	4228	4NQXC;3W0WA;3MRCA	6	0	0	6
HLA-A	HLA class I histocompatibility antigen, A-23 alpha chain	2.4	4228	2BCKD	2	0	0	2
HLA-A	HLA class I histocompatibility antigen, A-1 alpha chain	2.4	4228	1HSBA;4NQXC;2BCKD	5	0	0	5
HLA-A	HLA class I histocompatibility antigen, A-34 alpha chain	2.4	4228	4NQXC;3MRKA	2	0	0	2
HLA-A	HLA class I histocompatibility antigen, A-30 alpha chain	2.4	4228	4NQXC;3MRHA;2BCKD	4	0	0	4
HLA-A	HLA class I histocompatibility antigen, A-31 alpha chain	2.4	4228	4NQXC;3MRKA	2	0	0	2
HLA-A	HLA class I histocompatibility antigen, A-33 alpha chain	2.4	4228	4NQXC;3MRKA	2	0	0	2
HLA-A	HLA class I histocompatibility antigen, A-25 alpha chain	2.4	4228	2AV1D;3W0WA	4	0	0	4
HLA-A	HLA class I histocompatibility antigen, A-2 alpha chain	2.4	4228	2BCKD;3MRKA	3	0	0	3
HLA-A	HLA class I histocompatibility antigen, A-68 alpha chain	2.4	4228	4NQXG;3MRKA	3	0	0	3
RNASE4	Ribonuclease 4	2.4	1	2RNFA	1	1	0	0
BACE2	Beta-secretase 2	2.4	6	3ZKQA	2*	1	0	1
HLA-DRB1	HLA class II histocompatibility antigen, DRB1-16 beta chain	2.4	772	3O6FB;4AH2B	2	0	0	2
HLA-DRB1	HLA class II histocompatibility antigen, DRB1-9 beta chain	2.4	772	4AH2B	1	0	0	1
HLA-DRB1	HLA class II histocompatibility antigen, DRB1-1 beta chain	2.4	772	4AH2B	1	0	0	1
HLA-DRB1	HLA class II histocompatibility antigen, DRB1-13 beta chain	2.4	772	3O6FB;4AH2B	2	0	0	2
HLA-DRB1	HLA class II histocompatibility antigen, DRB1-11 beta chain	2.4	772	3O6FB;4AH2B	2	0	0	2
HLA-DRB1	HLA class II histocompatibility antigen, DRB1-10 beta chain	2.4	772	4AH2B	1	0	0	1
HLA-DRB1	HLA class II histocompatibility antigen, DRB1-3 chain	2.4	772	3O6FB	1	0	0	1
HLA-DRB1	HLA class II histocompatibility antigen, DRB1-15 beta chain	2.4	772	4AH2B	1	0	0	1
HLA-DRB1	HLA class II histocompatibility antigen, DRB1-4 beta chain	2.4	772	3O6FB;4AH2B	2	0	0	2
HLA-DRB1	HLA class II histocompatibility antigen, DRB1-8 beta chain	2.4	772	3O6FB;4AH2B	2	0	0	2
DBI	Acyl-CoA-binding protein	2.4	52	2CB8A	1	0	0	1
SERPING1	Plasma protease C1 inhibitor	2.4	16	2OAYA	6	0	0	6
FCGRT	IgG receptor FcRn large subunit p51	2.4	2	4K71B	2	0	1	1
IFI16	Gamma-interferon-inducible protein 16	2.4	63	2OQ0C;3RNUA	2	0	0	2
STK17B	Serine/threonine-protein kinase 17B	2.4	13	3LM5A	3*	1	0	2
NCF2	Neutrophil cytosol factor 2	2.4	17	1HH8A	2	0	1	1
NCF4	Neutrophil cytosol factor 4	2.4	15	1OEYK;1H6HA	3	0	0	3
BCHE	Cholinesterase	2.4	1448	4TPKA	3*	1	0	2
TYMS	Thymidylate synthase	2.4	3396	1HW4A	2*	1	0	1
STK32A	Serine/threonine-protein kinase 32A	2.4	1	4FR4E	5*	1	0	4
CASP8	Caspase-8	2.3	4998	4JJ7A	1*	0	0	1
MSN	Moesin	2.3	1275	1E5WA	3	0	1	2
LYPLA1	Acyl-protein thioesterase 1	2.3	10	1FJ2B	1	0	0	1
CDK6	Cyclin-dependent kinase 6	2.3	1105	4TTHB	3*	1	0	2
ARHGDIB	Rho GDP-dissociation inhibitor 2	2.3	96	1DS6B	2	0	1	1
HLA-C	HLA class I histocompatibility antigen, Cw-3 alpha chain	2.3	516	1IM9E;3BVNA	5	0	0	5
HLA-C	HLA class I histocompatibility antigen, Cw-1 alpha chain	2.3	516	1EFXA	3	0	0	3
HLA-C	HLA class I histocompatibility antigen, Cw-15 alpha chain	2.3	516	1EFXA;1A1MA	5	0	0	5
HLA-C	HLA class I histocompatibility antigen, Cw-7 alpha chain	2.3	516	1EFXA	3	0	0	3
HLA-C	HLA class I histocompatibility antigen, Cw-17 alpha chain	2.3	516	1EFXA	3	0	0	3
HLA-C	HLA class I histocompatibility antigen, Cw-6 alpha chain	2.3	516	3BVND;1IM9E	6	0	0	6
HLA-C	HLA class I histocompatibility antigen, Cw-16 alpha chain	2.3	516	3BVND;1IM9A	6	0	0	6
HLA-C	HLA class I histocompatibility antigen, Cw-5 alpha chain	2.3	516	3BVND;1IM9E	6	0	0	6
HLA-C	HLA class I histocompatibility antigen, Cw-18 alpha chain	2.3	516	3BVND;1IM9E	6	0	0	6
HLA-C	HLA class I histocompatibility antigen, Cw-4 alpha chain	2.3	516	1EFXA	3	0	0	3
HLA-C	HLA class I histocompatibility antigen, Cw-14 alpha chain	2.3	516	3BVND;1IM9E	6	0	0	6
HLA-C	HLA class I histocompatibility antigen, Cw-12 alpha chain	2.3	516	1EFXA;4JQVA	4	0	0	4
HLA-C	HLA class I histocompatibility antigen, Cw-2 alpha chain	2.3	516	1EFXA	3	0	0	3
HLA-C	HLA class I histocompatibility antigen, Cw-8 alpha chain	2.3	516	1EFXA;3FFCF	4	1	0	3
BLM	Bloom syndrome protein	2.3	1115	4CDGA	5	1	0	4
NEDD4	E3 ubiquitin-protein ligase NEDD4	2.3	152	2XBBB	3	1	0	2
TYMP	Thymidine phosphorylase	2.3	1247	2WK5B	4*	1	0	3
PLK4	Serine/threonine-protein kinase PLK4	2.3	101	3COKA	3*	1	0	2
CHEK1	Serine/threonine-protein kinase Chk1	2.2	75	2R0UA	1*	1	0	0
RAC2	Ras-related C3 botulinum toxin substrate 2	2.2	105	4GZLB	1	1	0	0
ERI1	3'-5' exoribonuclease 1	2.2	1	1ZBUD	2	1	0	1
PLAT	Tissue-type plasminogen activator	2.2	582	1A5HB	3*	1	0	2
GUSB	Beta-glucuronidase	2.2	1127	1BHGB	8	1	0	7
PRIM2	DNA primase large subunit	2.2	2	4BPUD;3L9QA	6	0	0	6
DTX3L	E3 ubiquitin-protein ligase DTX3L	2.2	6	3PG6C	1	0	0	1
LILRA2	Leukocyte immunoglobulin-like receptor subfamily A member 2	2.2	1	2OTPB	1	0	1	0
ATAD2	ATPase family AAA domain-containing protein 2	2.1	35	4QSPA	1*	0	1	0
C2	Complement C2	2.1	2893	2I6SA;3ERBA	6	1	0	5
ODC1	Ornithine decarboxylase	2.1	2649	2OO0B	3	1	0	2
PRCP	Lysosomal Pro-X carboxypeptidase	2.1	8	3N2ZB	2	1	0	1
SHMT2	Serine hydroxymethyltransferase, mitochondrial	2.1	11	3OU5A	4	0	1	3
MICB	MHC class I polypeptide-related sequence B	2.1	174	2WY3C	1	0	0	1
GINS3	DNA replication complex GINS protein PSF3	2.1	4	2Q9QH	1	0	1	0
NME4	Nucleoside diphosphate kinase, mitochondrial	2.1	10	1EHWB	1	1	0	0
GBE1	1,4-alpha-glucan-branching enzyme	2.1	13	4BZYB	3	0	0	3
NCF1	Neutrophil cytosol factor 1	2.1	11	1NG2A;1KQ6A	3	0	3	0
GNB2L1	Guanine nucleotide-binding protein subunit beta-2-like 1	2.1	74	4AOWA	1	0	0	1
GNAI3	Guanine nucleotide-binding protein G(k) subunit alpha	2	10	3UMSA	3	1	0	2
FBXO4	F-box only protein 4	2	14	3L2OB	1	0	0	1
IL10RB	Interleukin-10 receptor subunit beta	2	19	3LQMA	1	0	0	1
NUDT1	7,8-dihydro-8-oxoguanine triphosphatase	2	18	3Q93A	1	1	0	0
TLR2	Toll-like receptor 2	2	606	1FYXA	1	0	0	1
ADPRH	[Protein ADP-ribosylarginine] hydrolase	2	0	3HFWA	1	1	0	0
DPYSL3	Dihydropyrimidinase-related protein 3	2	17	4BKNB	2	1	0	1
PYCR1	Pyrroline-5-carboxylate reductase 1, mitochondrial	2	7	2IZZA	1	1	0	0
SAT1	Diamine acetyltransferase 1	2	11	2F5IB	2	1	0	1
BTK	Tyrosine-protein kinase BTK	2	320	1BWNB;4OT6A	3*	1	0	2
GGH	Gamma-glutamyl hydrolase	2	244	1L9XA	2	1	0	1
PARP12	Poly [ADP-ribose] polymerase 12	2	0	2PQFA	2	1	0	1
HNMT	Histamine N-methyltransferase	1.9	30	1JQEB	1*	1	0	0
DDX39A	ATP-dependent RNA helicase DDX39A	1.9	8	1XTIA	2	1	1	0
LY86	Lymphocyte antigen 86	1.9	5	3B2DC	1	0	0	1
TNFAIP8L2	Tumor necrosis factor alpha-induced protein 8-like protein 2	1.9	3	3F4MA	1	0	0	1
MB21D1	Cyclic GMP-AMP synthase	1.9	9	4O68A	3	1	1	1
ACE	Angiotensin-converting enzyme	1.9	1705	4BXKB;2IUXA	3*	1	0	2
RRAS	Ras-related protein R-Ras	1.9	52	2FN4A	1	1	0	0
SNX7	Sorting nexin-7	1.9	1	3IQ2B	2	0	0	2
ITGB2	Integrin beta-2	1.8	573	4NENB	4	0	1	3
GLIPR1	Glioma pathogenesis-related protein 1	1.8	38	3Q2RA	1	0	0	1
TXNIP	Thioredoxin-interacting protein	1.8	160	4LL4A	3	0	0	3
MAD2L2	Mitotic spindle assembly checkpoint protein MAD2B	1.8	36	4GK0B	1	0	1	0
MANF	Mesencephalic astrocyte-derived neurotrophic factor	1.8	9	2W51A	1	0	0	1
GSTK1	Glutathione S-transferase kappa 1	1.8	5	3RPPA	1	1	0	0
NRP1	Neuropilin-1	1.8	483	2QQMA	2	0	0	2
LXN	Latexin	1.8	23	2BO9D	1	0	1	0
AK2	Adenylate kinase 2, mitochondrial	1.8	5	2C9YA	1	1	0	0
PPIB	Peptidyl-prolyl cis-trans isomerase B	1.8	9	3ICIB	1	1	0	0
PLA2G4A	Cytosolic phospholipase A2	1.8	324	1CJYA	6	1	0	5
HEBP2	Heme-binding protein 2	1.8	2	3R8KD	1	0	0	1
SULT1C4	Sulfotransferase 1C4	1.8	2	2GWHA	1	1	0	0
CASP3	Caspase-3	1.8	16003	4QU9A	2*	1	0	1
NAGS	N-acetylglutamate synthase, mitochondrial	1.8	6	4K30B	1	0	0	1
HK2	Hexokinase-2	1.8	367	2NZTB	6	1	1	4
GALM	Aldose 1-epimerase	1.8	51	1SO0B	2	1	0	1
HEXB	Beta-hexosaminidase subunit beta	1.8	9	3LMYA	1	0	0	1
CDA	Cytidine deaminase	1.7	1516	1MQ0B	1	1	1	0
GLA	Alpha-galactosidase A	1.7	1069	3HG3A	2	1	1	1
DHFR	Dihydrofolate reductase	1.7	1588	4M6JA	2*	1	1	0
LYN	Tyrosine-protein kinase Lyn	1.7	660	3A4OX	2*	1	0	1
GALK1	Galactokinase	1.7	43	1WUUD	2	1	0	1
BOC	Brother of CDO	1.7	295	3N1GD	1	0	0	1
RAB31	Ras-related protein Rab-31	1.7	16	2FG5A	1	1	0	0
NAGA	Alpha-N-acetylgalactosaminidase	1.7	92	3H53B	1	1	0	0
HSD17B10	3-hydroxyacyl-CoA dehydrogenase type-2	1.7	5	2O23A	2*	2	0	0
PARP14	Poly [ADP-ribose] polymerase 14	1.7	11	4ABLA;4D86A;3SMIB	8*	3	0	5
RIT1	GTP-binding protein Rit1	1.7	16	4KLZA	1	0	0	1
APOM	Apolipoprotein M	1.7	17	2YG2A	1	0	0	1
PRIM1	DNA primase small subunit	1.7	4	4MHQA	4	0	0	4
ZC3HAV1	Zinc finger CCCH-type antiviral protein 1	1.7	4	2X5YA	1	0	0	1
PDIA6	Protein disulfide-isomerase A6	1.7	20	4GWRA	1	0	0	1
ITGB1	Integrin beta-1	1.6	183	3VI4D	2	0	1	1
CRYZ	Quinone oxidoreductase	1.6	724	1YB5B	1	1	0	0
DDB2	DNA damage-binding protein 2	1.6	142	4E54B	3	0	0	3
DUSP6	Dual specificity protein phosphatase 6	1.6	113	1MKPA	1	0	0	1
PNP	Purine nucleoside phosphorylase	1.6	798	4ECED	2*	1	1	1
PAICS	Multifunctional protein ADE2	1.6	8	2H31A	2	0	0	2
SYK	Tyrosine-protein kinase SYK	1.6	722	1A81E	3	0	0	3
CBX3	Chromobox protein homolog 3	1.6	26	3DM1A	1	0	1	0
CLIC4	Chloride intracellular channel protein 4	1.6	36	2AHEA	1	0	0	1
GALNT10	Polypeptide N-acetylgalactosaminyltransferase 10	1.6	3	2D7IA	3	1	0	2
MAPKAPK3	MAP kinase-activated protein kinase 3	1.6	11	3FHRA	2*	1	0	1
CTPS2	CTP synthase 2	1.6	2	2VKTA	1	0	0	1
RUVBL1	RuvB-like 1	1.6	47	2C9OB	5	1	0	4
GLB1	Beta-galactosidase	1.5	3116	3WEZA	4	1	0	3
IRAK4	Interleukin-1 receptor-associated kinase 4	1.5	48	4U9AA	3*	1	0	2
TPRKB	EKC/KEOPS complex subunit TPRKB	1.5	0	3ENPB	1	0	0	1
ECI2	Enoyl-CoA delta isomerase 2, mitochondrial	1.5	2	2F6QA	1	1	0	0
HLA-E	HLA class I histocompatibility antigen, alpha chain E	1.5	173	3AM8A	3	0	0	3
P4HB	Protein disulfide-isomerase	1.5	254	4EL1A	4	0	0	4
SDSL	Serine dehydratase-like	1.5	2	2RKBA	1	1	0	0
PCTP	Phosphatidylcholine transfer protein	1.5	17	1LN3B	2	0	0	2
TRIM24	Transcription intermediary factor 1-alpha	1.5	31	3O37A;2YYNC	3	0	0	3
GNB4	Guanine nucleotide-binding protein subunit beta-4	1.5	3	4PNKB	2	0	1	1

## Sheet: HNSC
Protein		Cancer		Structure
Symbol	Name	FC	Cancer Publications	PDB	All	ENZ	PPI	OTH
BRDT	Bromodomain testis-specific protein	7.1	19	4FLPB	1*	0	0	1
NR5A1	Steroidogenic factor 1	6.8	215	2A66A;4QK4A	5	0	0	5
MMP13	Collagenase 3	6.3	317	4FVLA	2	0	1	1
MAGEA4	Melanoma-associated antigen 4	6.1	142	2WA0A	1	0	0	1
CA9	Carbonic anhydrase 9	6	872	3IAIC	3	1	0	2
GUCA1C	Guanylyl cyclase-activating protein 3	4.9	0	2GGZB	1	0	0	1
MIOX	Inositol oxygenase	4.8	2	2IBNA	1	1	0	0
DDX53	Probable ATP-dependent RNA helicase DDX53	4.7	17	3IUYB	2	0	0	2
IL11	Interleukin-11	4.5	407	4MHLA	2	0	0	2
INHBA	Inhibin beta A chain	4.4	43	1S4YB	1	0	0	1
NGB	Neuroglobin	4.3	33	1OJ6A	1	0	0	1
HBE1	Hemoglobin subunit epsilon	4.1	5	1A9WF	1	0	0	1
MMP9	Matrix metalloproteinase-9	3.9	6042	1ITVA;1L6JA	6	1	0	5
MMP12	Macrophage metalloelastase	3.8	110	3BA0A	3	0	0	3
APOA4	Apolipoprotein A-IV	3.7	43	3S84B	2	0	2	0
IFNL2	Interferon lambda-2	3.6	0	3HHCC	1	0	0	1
IFNL1	Interferon lambda-1	3.6	5	3OG6A	1	0	0	1
AIM2	Interferon-inducible protein AIM2	3.4	67	3RN5D	1	0	0	1
CHIT1	Chitotriosidase-1	3.3	6	1WB0A	1*	1	0	0
IFNL3	Interferon lambda-3	3.3	7	3HHCC	1	0	0	1
ROS1	Proto-oncogene tyrosine-protein kinase ROS	3.1	256	3ZBFA	1*	1	0	0
CHAT	Choline O-acetyltransferase	3.1	353	2FY4A	6	1	0	5
DNMT3L	DNA (cytosine-5)-methyltransferase 3-like	3.1	45	2QRVF	3	0	0	3
HIST1H2BO	Histone H2B type 1-O	3	1	3AV1D	1	0	1	0
MMP1	Interstitial collagenase	3	533	1SU3A	3	0	0	3
MMP3	Stromelysin-1	2.9	363	1SLMA	4*	1	0	3
MMP10	Stromelysin-2	2.9	90	4ILWF	1	0	1	0
FN1	Fibronectin	2.9	6799	3M7PA	3	0	0	3
SERPINE1	Plasminogen activator inhibitor 1	2.9	1722	1C5GA	1	1	0	0
TNFSF4	Tumor necrosis factor ligand superfamily member 4	2.8	113	2HEVF	1	0	0	1
FABP4	Fatty acid-binding protein, adipocyte	2.8	73	4NNTA	1*	0	0	1
PCSK9	Proprotein convertase subtilisin/kexin type 9	2.8	34	2P4EA	5	1	2	3
PROC	Vitamin K-dependent protein C	2.8	28555	1AUTC	1*	1	0	0
TBX4	T-box transcription factor TBX4	2.8	9	2X6VB	1	0	1	0
FST	Follistatin	2.7	354	3HH2D	2	0	0	2
PTPRN	Receptor-type tyrosine-protein phosphatase-like N	2.7	20	2I1YB	2	0	0	2
MMP8	Neutrophil collagenase	2.7	53	1BZSA	2*	1	0	1
PIWIL1	Piwi-like protein 1	2.7	39	3O3IX	1	0	0	1
COL3A1	Collagen alpha-1(III) chain	2.6	39	4AE2A	1	0	0	1
GAD1	Glutamate decarboxylase 1	2.6	27	3VP6B	3	1	1	1
TBX5	T-box transcription factor TBX5	2.5	24	2X6VB	1	0	1	0
HIST1H2BM	Histone H2B type 1-M	2.5	1	3AV1D	1	0	1	0
PRDM9	Histone-lysine N-methyltransferase PRDM9	2.5	9	4IJDA	2	0	0	2
PLAU	Urokinase-type plasminogen activator	2.5	3633	2VNTD	1*	1	0	0
GRM1	Metabotropic glutamate receptor 1	2.5	55	3KS9B	1	0	0	1
FAP	Prolyl endopeptidase FAP	2.5	2296	1Z68A	7	0	0	7
CPA2	Carboxypeptidase A2	2.4	4	1AYEA	2	1	1	1
TH	Tyrosine 3-monooxygenase	2.4	1360162	2XSNB	2	1	1	0
F2	Prothrombin	2.4	3275	4NZQA	6	0	0	6
ELAVL2	ELAV-like protein 2	2.3	24	1G2EA	1	0	0	1
ITGA5	Integrin alpha-5	2.3	113	3VI4A	4	0	1	3
HNF4A	Hepatocyte nuclear factor 4-alpha	2.3	168	4IQRE	2	0	1	1
CTSE	Cathepsin E	2.3	70	1TZSA	2	1	1	0
UCHL1	Ubiquitin carboxyl-terminal hydrolase isozyme L1	2.2	323	3IFWA	2	1	1	1
EPHA8	Ephrin type-A receptor 8	2.2	14	3KULB	3	1	0	2
IFIT1	Interferon-induced protein with tetratricopeptide repeats 1	2.2	27	4HOUA	3	0	0	3
EPHB2	Ephrin type-B receptor 2	2.2	180	2QBXB;3ZFMA	3	1	1	1
GCK	Glucokinase	2.2	241	4RCHA	2*	1	0	1
SULT4A1	Sulfotransferase 4A1	2.2	6	1ZD1A	1	1	0	0
RHEBL1	GTPase RhebL1	2.1	7	3OESA	2	1	0	1
ZBTB32	Zinc finger and BTB domain-containing protein 32	2.1	3	3M5BB	1	0	1	0
IDO1	Indoleamine 2,3-dioxygenase 1	2.1	96	4PK5A	3	1	0	2
IFIT2	Interferon-induced protein with tetratricopeptide repeats 2	2.1	19	4G1TA	2	0	2	0
SYT1	Synaptotagmin-1	2.1	25	2R83A	1	0	0	1
NUDT11	Diphosphoinositol polyphosphate phosphohydrolase 3-beta	2.1	4	3MCFA	1	0	0	1
ROR2	Tyrosine-protein kinase transmembrane receptor ROR2	2	84	4GT4A	2	1	0	1
EME1	Crossover junction endonuclease EME1	2	42	4P0QB	1	0	0	1
PLA2G7	Platelet-activating factor acetylhydrolase	2	46	3F96A	2	1	0	1
PAX5	Paired box protein Pax-5	2	515	1K78A	1	0	0	1
PTPRR	Receptor-type tyrosine-protein phosphatase R	2	16	2A8BA	2	1	0	1
PKMYT1	Membrane-associated tyrosine- and threonine-specific cdc2-inhibitory kinase	2	13	3P1AA	2	1	0	1
2015-09-03	Neuronal-specific septin-3	2	1	3SOPA	2	1	1	1
AKR1C3	Aldo-keto reductase family 1 member C3	2	193	1S2AA	2	1	0	1
BHMT	Betaine--homocysteine S-methyltransferase 1	2	37	1LT7A	3	1	1	1
ADAM8	Disintegrin and metalloproteinase domain-containing protein 8	2	46	4DD8A	1*	1	0	0
AKR1C1	Aldo-keto reductase family 1 member C1	2	96	4JQ4B	1	1	0	0
BIRC5	Baculoviral IAP repeat-containing protein 5	2	3230	3UEHA	1	0	0	1
IFNG	Interferon gamma	2	14526	3BESL	1	0	0	1
TTBK1	Tau-tubulin kinase 1	2	1	4BTJA	2*	1	0	1
SPARC	SPARC	1.9	751	1NUBA	2	0	0	2
NTRK1	High affinity nerve growth factor receptor	1.9	125	4AOJC;1HE7A	5*	1	1	3
HK3	Hexokinase-3	1.9	57	3HM8C	5	1	0	4
KIF2C	Kinesin-like protein KIF2C	1.9	41	2HEHA	2	1	0	1
BCHE	Cholinesterase	1.9	1448	4TPKA	3*	1	0	2
CBS	Cystathionine beta-synthase	1.9	438	4UUUA;4COOB	4	0	0	4
CTLA4	Cytotoxic T-lymphocyte protein 4	1.9	1523	2X44D	1	0	0	1
MICB	MHC class I polypeptide-related sequence B	1.9	174	2WY3C	1	0	0	1
AURKB	Aurora kinase B	1.9	482	4AF3A	2*	1	0	1
CDC25C	M-phase inducer phosphatase 3	1.9	630	3OP3A	1	0	0	1
WARS	Tryptophan--tRNA ligase, cytoplasmic	1.9	3273	2QUKA	3	1	0	2
CTSV	Cathepsin L2	1.8	8	3KFQB	1	1	1	0
TK1	Thymidine kinase, cytosolic	1.8	222	2ORVB	1*	1	0	0
ODC1	Ornithine decarboxylase	1.8	2649	2OO0B	3	1	0	2
KIF3C	Kinesin-like protein KIF3C	1.8	7	3B6VA	2	1	1	1
EXO1	Exonuclease 1	1.8	171	3QEBZ	3	0	0	3
THBS2	Thrombospondin-2	1.8	129	1YO8A	2	0	0	2
CLEC4M	C-type lectin domain family 4 member M	1.8	7	1SL6B	1	0	1	0
KYNU	Kynureninase	1.8	16	2HZPA	2	0	0	2
SULT1E1	Estrogen sulfotransferase	1.8	122	1G3MA	1	1	0	0
AURKA	Aurora kinase A	1.8	655	2J4ZB	2*	1	0	1
SPTA1	Spectrin alpha chain, erythrocytic 1	1.7	5	3LBXA	1	0	0	1
FSCN1	Fascin	1.7	374	3P53B	2	0	0	2
BCAT1	Branched-chain-amino-acid aminotransferase, cytosolic	1.7	21	2COGA	3*	1	0	2
KCNK4	Potassium channel subfamily K member 4	1.7	1	4I9WB	4	0	1	3
CDC20	Cell division cycle protein 20 homolog	1.7	291	4GGDB	2*	0	0	2
PROCR	Endothelial protein C receptor	1.7	50	3JTCA	1	0	1	0
NT5E	5'-nucleotidase	1.7	869	4H2BA	4	1	0	3
HIST1H2BK	Histone H2B type 1-K	1.7	0	3AV1D	1	0	1	0
CHN1	N-chimaerin	1.7	13	3CXLA	4	0	1	3
PLK1	Serine/threonine-protein kinase PLK1	1.7	743	1Q4KB;2OWBA	4*	1	1	2
HIST1H2BH	Histone H2B type 1-H	1.7	0	3AV1D	1	0	1	0
CAMK1G	Calcium/calmodulin-dependent protein kinase type 1G	1.7	2	2JAMB	2*	1	0	1
AKR1C2	Aldo-keto reductase family 1 member C2	1.7	100	4JQ4B	1	1	0	0
HIST1H2BJ	Histone H2B type 1-J	1.7	1	3W99D	1	0	1	0
MELK	Maternal embryonic leucine zipper kinase	1.7	61	4UMUA	4*	1	0	3
HLA-G	HLA class I histocompatibility antigen, alpha chain G	1.7	453	2DYPA	1	0	0	1
RAC2	Ras-related C3 botulinum toxin substrate 2	1.7	105	4GZLB	1	1	0	0
IFNA1	Interferon alpha-1/13	1.7	11	3UX9C	2	0	0	2
IL1B	Interleukin-1 beta	1.6	1166	3POKA	1	0	0	1
MB21D1	Cyclic GMP-AMP synthase	1.6	9	4O68A	3	1	1	1
HIST1H2BL	Histone H2B type 1-L	1.6	2	3AV1D	1	0	1	0
UHRF1	E3 ubiquitin-protein ligase UHRF1	1.6	112	4GY5B;2PB7A	2	1	0	1
ADA	Adenosine deaminase	1.6	1819	3IARA	2	1	0	1
NEK2	Serine/threonine-protein kinase Nek2	1.6	113	2XK4A	3*	1	0	2
DDX58	Probable ATP-dependent RNA helicase DDX58	1.6	87	4BPBA	5	0	0	5
GINS2	DNA replication complex GINS protein PSF2	1.6	10	2Q9QA	1	0	1	0
FLRT2	Leucine-rich repeat transmembrane protein FLRT2	1.6	4	4V2DA	1	0	0	1
FGFR4	Fibroblast growth factor receptor 4	1.6	258	4QQ5A	2*	1	0	1
PTPRD	Receptor-type tyrosine-protein phosphatase delta	1.6	146	2FH7A;4RCAA	7	1	0	6
HIST1H2BC	Histone H2B type 1-C/E/F/G/I	1.6	1	3AV1D	1	0	1	0
ITGA1	Integrin alpha-1	1.6	25	1PT6B	1	0	0	1
ATAD2	ATPase family AAA domain-containing protein 2	1.6	35	4QSPA	1*	0	1	0
KIF18A	Kinesin-like protein KIF18A	1.6	15	3LREB	4	1	0	3
ITGA2B	Integrin alpha-IIb	1.6	50	2VDNA	3	0	1	2
EIF2AK2	Interferon-induced, double-stranded RNA-activated protein kinase	1.5	8	3UIUB	2	1	0	1
IL21R	Interleukin-21 receptor	1.5	263	3TGXM	1	0	1	0
ITPKA	Inositol-trisphosphate 3-kinase A	1.5	10	1W2FA	1	1	0	0
RAD51	DNA repair protein RAD51 homolog 1	1.5	1451	1N0WA	2	0	0	2
TPBG	Trophoblast glycoprotein	1.5	16	4CNMA	2	0	0	2
HIST1H2BN	Histone H2B type 1-N	1.5	1	3AV1D	1	0	1	0
IL7R	Interleukin-7 receptor subunit alpha	1.5	53	3UP1B	1	0	0	1
NAGS	N-acetylglutamate synthase, mitochondrial	1.5	6	4K30B	1	0	0	1
CCNE1	G1/S-specific cyclin-E1	1.5	266	1W98B	2	0	1	1
IL2RA	Interleukin-2 receptor subunit alpha	1.5	987	2ERJE	1	0	1	0
MMP14	Matrix metalloproteinase-14	1.5	650	3MA2A	1	1	1	0
CBX2	Chromobox protein homolog 2	1.5	16	3H91A	1	0	1	0
PARP12	Poly [ADP-ribose] polymerase 12	1.5	0	2PQFA	2	1	0	1
BUB1	Mitotic checkpoint serine/threonine-protein kinase BUB1	1.5	378	4R8QA	4	1	0	3

## Sheet: KIRC
Protein		Cancer		Structure
Symbol	Name	FC	Cancer Publications	PDB	All	ENZ	PPI	OTH
CYP2A6	Cytochrome P450 2A6	8	323	2PG6B	3	0	0	3
APOA4	Apolipoprotein A-IV	7.7	43	3S84B	2	0	2	0
TBX5	T-box transcription factor TBX5	7.4	24	2X6VB	1	0	1	0
CRP	C-reactive protein	6.8	5207	3PVOD	1	0	0	1
CHAT	Choline O-acetyltransferase	6.7	353	2FY4A	6	1	0	5
KLK4	Kallikrein-4	6.4	92	4K8YA	1*	1	0	0
ORM2	Alpha-1-acid glycoprotein 2	6.4	15	3APUB	1*	0	0	1
LCN1	Lipocalin-1	6.3	9	3EYCA	1	0	1	0
ORM1	Alpha-1-acid glycoprotein 1	6.1	25	3KQ0A	1	0	0	1
CA9	Carbonic anhydrase 9	5.9	872	3IAIC	3	1	0	2
FABP7	Fatty acid-binding protein, brain	5.9	123	1FE3A	1	0	0	1
C8A	Complement component C8 alpha chain	5.8	1	3OJYA	7	0	1	6
MMP13	Collagenase 3	5.5	317	4FVLA	2	0	1	1
F9	Coagulation factor IX	5.4	1031	2WPKS	1*	1	0	0
CHIT1	Chitotriosidase-1	5.4	6	1WB0A	1*	1	0	0
C8B	Complement component C8 beta chain	5.4	2	3OJYB	8	0	2	6
MBL2	Mannose-binding protein C	5.2	74	1HUPA	1	0	0	1
SULT2A1	Bile salt sulfotransferase	5.2	35	1J99A	3	1	0	2
TAT	Tyrosine aminotransferase	5.1	2048	3DYDB	2	0	0	2
SDS	L-serine dehydratase/L-threonine deaminase	5	4843	1P5JA	1	1	0	0
CYP2A7	Cytochrome P450 2A7	5	22	2PG6B	3	0	0	3
IFNG	Interferon gamma	4.8	14526	3BESL	1	0	0	1
ALOX15B	Arachidonate 15-lipoxygenase B	4.6	19	4NREA	5	1	0	4
AKR1D1	3-oxo-5-beta-steroid 4-dehydrogenase	4.5	5	3UZWB	2	1	0	1
TF	Serotransferrin	4.4	2509	3V8XB	5	0	1	4
MMP9	Matrix metalloproteinase-9	4.3	6042	1ITVA;1L6JA	6	1	0	5
ITPKA	Inositol-trisphosphate 3-kinase A	4.3	10	1W2FA	1	1	0	0
AHNAK2	Protein AHNAK2	4.2	0	4CN0B	2	0	2	0
ARG1	Arginase-1	4.1	209	4FCKA	1*	1	0	0
CPB2	Carboxypeptidase B2	4.1	34	3D68A	1	1	0	0
HSPA7	Putative heat shock 70 kDa protein 7	4.1	12	3FE1B	1	1	0	0
HLA-G	HLA class I histocompatibility antigen, alpha chain G	4	453	2DYPA	1	0	0	1
GSTA3	Glutathione S-transferase A3	4	16	1USBB	2	1	0	1
NNMT	Nicotinamide N-methyltransferase	4	74	2IIPA	1	1	0	0
CP	Ceruloplasmin	3.9	7859	2J5WA	9	0	0	9
PLA2G7	Platelet-activating factor acetylhydrolase	3.9	46	3F96A	2	1	0	1
SERPINA12	Serpin A12	3.9	9	4IF8A	3	0	0	3
KLK2	Kallikrein-2	3.9	245	4NFEA	1*	1	0	0
F2	Prothrombin	3.8	3275	4NZQA	6	0	0	6
SERPIND1	Heparin cofactor 2	3.8	5	1JMOA	5	0	0	5
TCN1	Transcobalamin-1	3.7	9	4KKJA	4	0	0	4
UGT2B4	UDP-glucuronosyltransferase 2B4	3.6	26	2O6LA	1	0	0	1
HK2	Hexokinase-2	3.5	367	2NZTB	6	1	1	4
ITGAX	Integrin alpha-X	3.4	723	4NENA	7	0	0	7
C3	Complement C3	3.4	3421	2WIIA;2WIIB	15	0	2	13
GZMK	Granzyme K	3.4	15	1MZDA	1	1	0	0
IDO1	Indoleamine 2,3-dioxygenase 1	3.4	96	4PK5A	3	1	0	2
RNASET2	Ribonuclease T2	3.2	27	3T0OA	2	0	0	2
TP73	Tumor protein p73	3.2	149	3VD0D	2	0	0	2
EPO	Erythropoietin	3.2	5134	1EERA	2	0	0	2
AIM2	Interferon-inducible protein AIM2	3.2	67	3RN5D	1	0	0	1
GZMA	Granzyme A	3.2	137	1ORFA	1	1	0	0
CPA4	Carboxypeptidase A4	3.2	6	2BOAA	2	1	0	1
ZAP70	Tyrosine-protein kinase ZAP-70	3.2	691	4K2RA	7	1	0	6
GZMH	Granzyme H	3.1	12	3TJVA	1	1	0	0
F12	Coagulation factor XII	3.1	212	4BDXA	1	0	0	1
TRIM72	Tripartite motif-containing protein 72	3.1	0	3KB5A	1	0	0	1
RLBP1	Retinaldehyde-binding protein 1	3.1	0	4CJ6A	4	0	0	4
PARP15	Poly [ADP-ribose] polymerase 15	3.1	5	3GEYA;3V2BA	2*	1	0	1
CTLA4	Cytotoxic T-lymphocyte protein 4	3	1523	2X44D	1	0	0	1
LILRB1	Leukocyte immunoglobulin-like receptor subfamily B member 1	3	37	4LL9B;3D2UH	2	0	0	2
TYMP	Thymidine phosphorylase	3	1247	2WK5B	4*	1	0	3
GAD2	Glutamate decarboxylase 2	2.9	33	2OKKA	5	1	0	4
CD1A	T-cell surface glycoprotein CD1a	2.9	887	1ONQA	2	0	0	2
HK3	Hexokinase-3	2.9	57	3HM8C	5	1	0	4
PKMYT1	Membrane-associated tyrosine- and threonine-specific cdc2-inhibitory kinase	2.9	13	3P1AA	2	1	0	1
AURKB	Aurora kinase B	2.9	482	4AF3A	2*	1	0	1
CDC25C	M-phase inducer phosphatase 3	2.9	630	3OP3A	1	0	0	1
PTPRN	Receptor-type tyrosine-protein phosphatase-like N	2.9	20	2I1YB	2	0	0	2
FGG	Fibrinogen gamma chain	2.9	191	3GHGF	1	0	0	1
GCKR	Glucokinase regulatory protein	2.9	14	4OLHA	6	0	0	6
KLRK1	NKG2-D type II integral membrane protein	2.9	457	1MPUA	1	0	1	0
MMP12	Macrophage metalloelastase	2.9	110	3BA0A	3	0	0	3
CYP2D6	Cytochrome P450 2D6	2.8	900	3QM4A	5*	0	0	5
AKR1B10	Aldo-keto reductase family 1 member B10	2.8	115	4JIIX	1*	1	0	0
SPTA1	Spectrin alpha chain, erythrocytic 1	2.8	5	3LBXA	1	0	0	1
CA1	Carbonic anhydrase 1	2.8	224	2NMXA	3*	1	0	2
CSF3R	Granulocyte colony-stimulating factor receptor	2.8	1753	2D9QB	1	0	0	1
ACAP1	Arf-GAP with coiled-coil, ANK repeat and PH domain-containing protein 1	2.8	6	3T9KB;4NSWA	2	0	0	2
CYP7A1	Cholesterol 7-alpha-monooxygenase	2.8	92	3SN5B	3	0	0	3
GH2	Growth hormone variant	2.8	24	1A22A	1	0	0	1
CTSE	Cathepsin E	2.7	70	1TZSA	2	1	1	0
SERPINC1	Antithrombin-III	2.7	782	4EB1I	4	0	0	4
BIRC5	Baculoviral IAP repeat-containing protein 5	2.7	3230	3UEHA	1	0	0	1
HSPA6	Heat shock 70 kDa protein 6	2.7	13	3FE1B	1	1	0	0
ADH4	Alcohol dehydrogenase 4	2.7	13	3COSD	1	1	0	0
GZMB	Granzyme B	2.7	1487	1IAUA	1*	1	0	0
IL21R	Interleukin-21 receptor	2.7	263	3TGXM	1	0	1	0
MMP16	Matrix metalloproteinase-16	2.7	50	1RM8A	2*	1	0	1
TDO2	Tryptophan 2,3-dioxygenase	2.7	51	4PW8F	2	1	1	1
MELK	Maternal embryonic leucine zipper kinase	2.7	61	4UMUA	4*	1	0	3
SERPINA7	Thyroxine-binding globulin	2.7	109	2CEOB	3	0	0	3
SLAMF6	SLAM family member 6	2.7	5	2IF7D	2	0	0	2
SULT4A1	Sulfotransferase 4A1	2.7	6	1ZD1A	1	1	0	0
ITGAL	Integrin alpha-L	2.6	363	1RD4D	1*	0	1	0
KIR2DL3	Killer cell immunoglobulin-like receptor 2DL3	2.6	64	1B6UA	1	0	0	1
UHRF1	E3 ubiquitin-protein ligase UHRF1	2.6	112	4GY5B;2PB7A	2	1	0	1
AGER	Advanced glycosylation end product-specific receptor	2.6	96	4OF5A	1	0	0	1
KIR2DL1	Killer cell immunoglobulin-like receptor 2DL1	2.6	72	1B6UA	1	0	0	1
STAMBPL1	AMSH-like protease	2.6	2	2ZNRA	1	0	1	0
NR5A1	Steroidogenic factor 1	2.6	215	2A66A;4QK4A	5	0	0	5
JAK3	Tyrosine-protein kinase JAK3	2.5	408	3LXLA	1*	1	0	0
SH2D1A	SH2 domain-containing protein 1A	2.5	108	1D4WA	1	0	1	0
LY86	Lymphocyte antigen 86	2.5	5	3B2DC	1	0	0	1
NCF1	Neutrophil cytosol factor 1	2.5	11	1NG2A;1KQ6A	3	0	3	0
RNASE2	Non-secretory ribonuclease	2.5	6	1K2AA	1	1	1	0
KLRC2	NKG2-C type II integral membrane protein	2.5	100	3BDWD	1	0	0	1
HIST1H2BM	Histone H2B type 1-M	2.5	1	3AV1D	1	0	1	0
ANK1	Ankyrin-1	2.5	23	3UD2C;1N11A	3	0	1	2
CHI3L2	Chitinase-3-like protein 2	2.5	5	4P8XA	2	0	0	2
VAV1	Proto-oncogene vav	2.5	208	3KY9A	5	0	2	3
ITGB2	Integrin beta-2	2.4	573	4NENB	4	0	1	3
NCF1C	Putative neutrophil cytosol factor 1C	2.4	0	1NG2A;1KQ6A	3	0	3	0
HIST1H2BL	Histone H2B type 1-L	2.4	2	3AV1D	1	0	1	0
ISG20	Interferon-stimulated gene 20 kDa protein	2.4	11	1WLJA	1	1	0	0
NCF1B	Putative neutrophil cytosol factor 1B	2.4	0	1NG2A;1KQ6A	3	0	3	0
CENPM	Centromere protein M	2.4	0	4P0TA	1	0	0	1
CPB1	Carboxypeptidase B	2.4	58	1KWMA	3	0	3	0
OTC	Ornithine carbamoyltransferase, mitochondrial	2.4	167	1FVOA	1*	1	0	0
DDX53	Probable ATP-dependent RNA helicase DDX53	2.4	17	3IUYB	2	0	0	2
PRSS57	Serine protease 57	2.4	0	4Q7ZA	1*	1	0	0
FGB	Fibrinogen beta chain	2.4	21	3GHGE	1	0	0	1
AZU1	Azurocidin	2.4	13	1AE5A	1	1	0	0
HMOX1	Heme oxygenase 1	2.4	893	3TGMB	1	1	0	0
KLRD1	Natural killer cells antigen CD94	2.4	128	1B6EA	1	0	0	1
ALDOC	Fructose-bisphosphate aldolase C	2.4	8	1XFBA	3	1	0	2
RHEBL1	GTPase RhebL1	2.4	7	3OESA	2	1	0	1
LILRB2	Leukocyte immunoglobulin-like receptor subfamily B member 2	2.4	28	4LLAB;2GW5A	2	0	0	2
TNFAIP8L2	Tumor necrosis factor alpha-induced protein 8-like protein 2	2.4	3	3F4MA	1	0	0	1
ADA	Adenosine deaminase	2.4	1819	3IARA	2	1	0	1
IL2RA	Interleukin-2 receptor subunit alpha	2.3	987	2ERJE	1	0	1	0
CD1D	Antigen-presenting glycoprotein CD1d	2.3	449	3U0PA	1	0	0	1
ADH7	Alcohol dehydrogenase class 4 mu/sigma chain	2.3	21	1D1SA	1	1	0	0
BUB1	Mitotic checkpoint serine/threonine-protein kinase BUB1	2.3	378	4R8QA	4	1	0	3
ADAM8	Disintegrin and metalloproteinase domain-containing protein 8	2.3	46	4DD8A	1*	1	0	0
DOCK2	Dedicator of cytokinesis protein 2	2.3	17	2YINB;3A98A	6	0	2	4
DDB2	DNA damage-binding protein 2	2.3	142	4E54B	3	0	0	3
KCNMA1	Calcium-activated potassium channel subunit alpha-1	2.3	33	3MT5A	8	0	0	8
GP6	Platelet glycoprotein VI	2.3	212	2GI7B	1	0	0	1
PRDM1	PR domain zinc finger protein 1	2.3	192	3DALB	1	0	0	1
SERPINE1	Plasminogen activator inhibitor 1	2.3	1722	1C5GA	1	1	0	0
BTK	Tyrosine-protein kinase BTK	2.3	320	1BWNB;4OT6A	3*	1	0	2
EME1	Crossover junction endonuclease EME1	2.3	42	4P0QB	1	0	0	1
ALK	ALK tyrosine kinase receptor	2.3	2868	4MKCA	2*	1	0	1
RRM2	Ribonucleoside-diphosphate reductase subunit M2	2.3	142	2UW2A	2	0	0	2
PLK1	Serine/threonine-protein kinase PLK1	2.3	743	1Q4KB;2OWBA	4*	1	1	2
FCGR2C	Low affinity immunoglobulin gamma Fc region receptor II-c	2.2	1	3WJLC	1	0	0	1
PF4V1	Platelet factor 4 variant	2.2	9	4HSVD	1	0	0	1
SEC14L3	SEC14-like protein 3	2.2	1	4UYBA	4	0	0	4
GZMM	Granzyme M	2.2	13	2ZGCA	2	1	0	1
PLCB2	1-phosphatidylinositol 4,5-bisphosphate phosphodiesterase beta-2	2.2	8	2ZKMX	9	0	0	9
CD5	T-cell surface glycoprotein CD5	2.2	3076	2JA4A	1	0	0	1
CARD11	Caspase recruitment domain-containing protein 11	2.2	93	4LWDA	1	0	0	1
PTPN22	Tyrosine-protein phosphatase non-receptor type 22	2.2	23	4J51B	3	0	0	3
XDH	Xanthine dehydrogenase/oxidase	2.2	34	2E1QD	10	1	0	9
PKP1	Plakophilin-1	2.2	46	1XM9A	1	0	0	1
KLRC1	NKG2-A/NKG2-B type II integral membrane protein	2.2	72	3BDWD	1	0	0	1
TYMS	Thymidylate synthase	2.2	3396	1HW4A	2*	1	0	1
DDIT4	DNA damage-inducible transcript 4 protein	2.2	77	3LQ9A	2	0	0	2
IL2	Interleukin-2	2.2	17744	1PW6A	1	0	0	1
PLK2	Serine/threonine-protein kinase PLK2	2.2	62	4RS6A;4I5PA	2*	1	0	1
ITK	Tyrosine-protein kinase ITK/TSK	2.2	90	3QGWA	1*	1	0	0
ZBTB32	Zinc finger and BTB domain-containing protein 32	2.2	3	3M5BB	1	0	1	0
C2	Complement C2	2.2	2893	2I6SA;3ERBA	6	1	0	5
RAC2	Ras-related C3 botulinum toxin substrate 2	2.1	105	4GZLB	1	1	0	0
TLR8	Toll-like receptor 8	2.1	137	3W3GA	4	0	0	4
ANXA8L2	Annexin A8-like protein 2	2.1	0	1W45B	1	0	0	1
TIMP1	Metalloproteinase inhibitor 1	2.1	323	1UEAB	2	0	0	2
CRYBB1	Beta-crystallin B1	2.1	1	1OKIA	1	0	0	1
KIFC1	Kinesin-like protein KIFC1	2.1	10	2REPA	2	1	0	1
NCF4	Neutrophil cytosol factor 4	2.1	15	1OEYK;1H6HA	3	0	0	3
KIR3DL1	Killer cell immunoglobulin-like receptor 3DL1	2.1	71	3VH8H	1	0	0	1
CD38	ADP-ribosyl cyclase/cyclic ADP-ribose hydrolase 1	2.1	2261	3DZKA	2	1	0	1
IL12B	Interleukin-12 subunit beta	2.1	43	4OE8A	1	0	1	0
MASP1	Mannan-binding lectin serine protease 1	2.1	8	4IGDA	2	1	0	1
CYGB	Cytoglobin	2.1	51	2DC3A	1	0	0	1
ALOX5	Arachidonate 5-lipoxygenase	2.1	399	3O8YA	7	1	0	6
LINGO1	Leucine-rich repeat and immunoglobulin-like domain-containing nogo receptor-interacting protein 1	2.1	4	2ID5D	2	0	1	1
HCK	Tyrosine-protein kinase HCK	2.1	165	3VRYB	6*	1	0	5
CCNA2	Cyclin-A2	2.1	300	2BPMD	1	0	0	1
LILRA2	Leukocyte immunoglobulin-like receptor subfamily A member 2	2.1	1	2OTPB	1	0	1	0
FABP5	Fatty acid-binding protein, epidermal	2.1	83	4LKPA	1	0	0	1
ITGAM	Integrin alpha-M	2.1	1179	4M76B	2	0	0	2
BIN2	Bridging integrator 2	2.1	5	4AVMA	2	0	1	1
TOP2A	DNA topoisomerase 2-alpha	2.1	355	4R1FA;4FM9A	8	2	0	6
ITGA5	Integrin alpha-5	2	113	3VI4A	4	0	1	3
ADAMTS4	A disintegrin and metalloproteinase with thrombospondin motifs 4	2	17	2RJPC	1*	1	0	0
HDC	Histidine decarboxylase	2	745	4E1OF	3	1	1	2
PYGL	Glycogen phosphorylase, liver form	2	6	2ZB2A	10	1	2	7
MEF2B	Myocyte-specific enhancer factor 2B	2	18	1TQER	1	0	1	0
SCN4B	Sodium channel subunit beta-4	2	2	4MZ3B	1	0	0	1
HLA-B	HLA class I histocompatibility antigen, B-58 alpha chain	2	1201	1A1MA	2	0	0	2
HLA-B	HLA class I histocompatibility antigen, B-78 alpha chain	2	1201	1EFXA;1A1MA	5	0	0	5
HLA-B	HLA class I histocompatibility antigen, B-54 alpha chain	2	1201	1EFXA;1A1MA	5	0	0	5
HLA-B	HLA class I histocompatibility antigen, B-52 alpha chain	2	1201	1A1MA;3VCLA	3	0	0	3
HLA-B	HLA class I histocompatibility antigen, B-56 alpha chain	2	1201	1EFXA;1A1MA	5	0	0	5
HLA-B	HLA class I histocompatibility antigen, B-15 alpha chain	2	1201	1EFXA;1A1MA	5	0	0	5
HLA-B	HLA class I histocompatibility antigen, B-14 alpha chain	2	1201	1EFXA;1A1MA	5	0	0	5
HLA-B	HLA class I histocompatibility antigen, B-13 alpha chain	2	1201	1A1MA	2	0	0	2
HLA-B	HLA class I histocompatibility antigen, B-38 alpha chain	2	1201	1A1MA;3VCLA	3	0	0	3
HLA-B	HLA class I histocompatibility antigen, B-7 alpha chain	2	1201	1EFXA;4JQVA	4	0	0	4
HLA-B	HLA class I histocompatibility antigen, B-50 alpha chain	2	1201	1A1MA;3VCLA	3	0	0	3
HLA-B	HLA class I histocompatibility antigen, B-44 alpha chain	2	1201	1A1MA	2	0	0	2
HLA-B	HLA class I histocompatibility antigen, B-42 alpha chain	2	1201	1EFXA;1A1MA	5	0	0	5
HLA-B	HLA class I histocompatibility antigen, B-45 alpha chain	2	1201	1A1MA;3VCLA	3	0	0	3
HLA-B	HLA class I histocompatibility antigen, B-47 alpha chain	2	1201	1A1MA;3VCLA	3	0	0	3
HLA-B	HLA class I histocompatibility antigen, B-46 alpha chain	2	1201	1EFXA;1A1MA	5	0	0	5
HLA-B	HLA class I histocompatibility antigen, B-49 alpha chain	2	1201	1A1MA	2	0	0	2
HLA-B	HLA class I histocompatibility antigen, B-48 alpha chain	2	1201	1A1MA;3VCLA	3	0	0	3
HLA-B	HLA class I histocompatibility antigen, B-73 alpha chain	2	1201	3BVND	2	0	0	2
HLA-B	HLA class I histocompatibility antigen, B-8 alpha chain	2	1201	1A1MA;3VCLA	3	0	0	3
HLA-B	HLA class I histocompatibility antigen, B-67 alpha chain	2	1201	1EFXA;1A1MA	5	0	0	5
HLA-B	HLA class I histocompatibility antigen, B-35 alpha chain	2	1201	1EFXA;1A1MA	5	0	0	5
HLA-B	HLA class I histocompatibility antigen, B-40 alpha chain	2	1201	1A1MA;3VCLA	3	0	0	3
HLA-B	HLA class I histocompatibility antigen, B-59 alpha chain	2	1201	1A1MA;3VCLA	3	0	0	3
HLA-B	HLA class I histocompatibility antigen, B-41 alpha chain	2	1201	1A1MA;3VCLA	3	0	0	3
HLA-B	HLA class I histocompatibility antigen, B-39 alpha chain	2	1201	1A1MA;3VCLA	3	0	0	3
HLA-B	HLA class I histocompatibility antigen, B-55 alpha chain	2	1201	1EFXA;1A1MA	5	0	0	5
HLA-B	HLA class I histocompatibility antigen, B-53 alpha chain	2	1201	1A1MA;3VCLA	3	0	0	3
HLA-B	HLA class I histocompatibility antigen, B-81 alpha chain	2	1201	4JQVA;4NT6A	3	0	0	3
HLA-B	HLA class I histocompatibility antigen, B-18 alpha chain	2	1201	1A1MA;3VCLA	3	0	0	3
HLA-B	HLA class I histocompatibility antigen, B-27 alpha chain	2	1201	1A1MA;3VCLA	3	0	0	3
HLA-B	HLA class I histocompatibility antigen, B-57 alpha chain	2	1201	1A1MA	2	0	0	2
HLA-B	HLA class I histocompatibility antigen, B-51 alpha chain	2	1201	1A1MA;3VCLA	3	0	0	3
HLA-B	HLA class I histocompatibility antigen, B-37 alpha chain	2	1201	1A1MA;3VCLA	3	0	0	3
HLA-B	HLA class I histocompatibility antigen, B-82 alpha chain	2	1201	1A1MA;3VCLA	3	0	0	3
FCGR2B	Low affinity immunoglobulin gamma Fc region receptor II-b	2	39	3WJLC	1	0	0	1
NCR3	Natural cytotoxicity triggering receptor 3	2	63	3NOIA	1	0	1	0
GINS2	DNA replication complex GINS protein PSF2	2	10	2Q9QA	1	0	1	0
AMY1A	Alpha-amylase 1	2	2	3IJ9A	1*	1	0	0
APOBEC3C	DNA dC->dU-editing enzyme APOBEC-3C	2	13	3VM8A	1	0	0	1
SHMT2	Serine hydroxymethyltransferase, mitochondrial	2	11	3OU5A	4	0	1	3
KCNK4	Potassium channel subfamily K member 4	2	1	4I9WB	4	0	1	3
EZH2	Histone-lysine N-methyltransferase EZH2	2	1168	4MI0A	2	0	0	2
EXO1	Exonuclease 1	2	171	3QEBZ	3	0	0	3
CLIC3	Chloride intracellular channel protein 3	2	10	3KJYB	1	0	0	1
TAP1	Antigen peptide transporter 1	2	413	1JJ7A	1	0	0	1
APOA1	Apolipoprotein A-I	2	489	2A01C	6	0	0	6
CYP2C9	Cytochrome P450 2C9	1.9	327	1R9OA	5	0	0	5
CTSS	Cathepsin S	1.9	97	2C0YA	1	1	0	0
HIST1H2BH	Histone H2B type 1-H	1.9	0	3AV1D	1	0	1	0
AKR1C4	Aldo-keto reductase family 1 member C4	1.9	25	2FVLC	2	1	0	1
OSM	Oncostatin-M	1.9	547	1EVSA	1	0	0	1
CYP2C8	Cytochrome P450 2C8	1.9	163	2NNHB	6	0	0	6
MLKL	Mixed lineage kinase domain-like protein	1.9	30	4MWIA	2	0	0	2
GABBR2	Gamma-aminobutyric acid type B receptor subunit 2	1.9	2	4F11A	2	0	0	2
SERPINA10	Protein Z-dependent protease inhibitor	1.9	11	4AJUA	5	0	0	5
CYP2C19	Cytochrome P450 2C19	1.9	281	4GQSD	8*	0	0	8
DPYSL5	Dihydropyrimidinase-related protein 5	1.9	43	4B90B	2	0	0	2
FLT1	Vascular endothelial growth factor receptor 1	1.9	1101	3HNGA	1*	1	0	0
FCGR2A	Low affinity immunoglobulin gamma Fc region receptor II-a	1.9	43	3WJLC	1	0	0	1
CYP11B1	Cytochrome P450 11B1, mitochondrial	1.9	170	4FDHG	5	0	0	5
HLA-DPA1	HLA class II histocompatibility antigen, DP alpha 1 chain	1.9	24	3WEXC	1	0	1	0
ANXA4	Annexin A4	1.9	57	2ZOCB	2	0	0	2
AMY2B	Alpha-amylase 2B	1.9	5	3IJ9A	1*	1	0	0
TREX2	Three prime repair exonuclease 2	1.9	14	1Y97B	1	1	0	0
RPGRIP1	X-linked retinitis pigmentosa GTPase regulator-interacting protein 1	1.9	2	4QAMB	1	0	0	1
SPARC	SPARC	1.9	751	1NUBA	2	0	0	2
PDK1	[Pyruvate dehydrogenase (acetyl-transferring)] kinase isozyme 1, mitochondrial	1.9	435	2Q8HA	3	1	0	2
FN1	Fibronectin	1.9	6799	3M7PA	3	0	0	3
PTPRC	Receptor-type tyrosine-protein phosphatase C	1.9	166	1YGRB	3	1	0	2
NEK2	Serine/threonine-protein kinase Nek2	1.9	113	2XK4A	3*	1	0	2
ELMO1	Engulfment and cell motility protein 1	1.8	23	3A98D	1	0	0	1
SPHK1	Sphingosine kinase 1	1.8	306	4L02B	1	1	0	0
EPHA3	Ephrin type-A receptor 3	1.8	73	2QOLA;4L0PA	3*	1	2	0
GBP1	Interferon-induced guanylate-binding protein 1	1.8	31	1F5NA	7	0	1	6
CDC20	Cell division cycle protein 20 homolog	1.8	291	4GGDB	2*	0	0	2
PYCR1	Pyrroline-5-carboxylate reductase 1, mitochondrial	1.8	7	2IZZA	1	1	0	0
ANXA8	Annexin A8	1.8	2071	1W45B	1	0	0	1
RYR2	Ryanodine receptor 2	1.8	118	4JKQA	5	0	0	5
TTK	Dual specificity protein kinase TTK	1.8	143	2ZMDA	1*	1	0	0
HIST1H2BO	Histone H2B type 1-O	1.8	1	3AV1D	1	0	1	0
PTPN7	Tyrosine-protein phosphatase non-receptor type 7	1.8	7	1ZC0A	2	0	0	2
CENPE	Centromere-associated protein E	1.8	29	1T5CA	3	1	0	2
TGM3	Protein-glutamine gamma-glutamyltransferase E	1.8	23	1NUDB	6	1	0	5
ARHGAP11B	Rho GTPase-activating protein 11B	1.8	0	3EAPA	3	0	1	2
GSG2	Serine/threonine-protein kinase haspin	1.8	7	3DLZA	1*	1	1	0
KIF18A	Kinesin-like protein KIF18A	1.8	15	3LREB	4	1	0	3
TBX4	T-box transcription factor TBX4	1.8	9	2X6VB	1	0	1	0
NCF2	Neutrophil cytosol factor 2	1.8	17	1HH8A	2	0	1	1
LY96	Lymphocyte antigen 96	1.8	41	4G8AC	1	0	0	1
HLA-A	HLA class I histocompatibility antigen, A-24 alpha chain	1.8	4228	4NQXC;2BCKD;3MRKA	4	0	0	4
HLA-A	HLA class I histocompatibility antigen, A-33 alpha chain	1.8	4228	4NQXC;3MRKA	2	0	0	2
HLA-A	HLA class I histocompatibility antigen, A-11 alpha chain	1.8	4228	4NQXC;3MRHA;2BCKD	4	0	0	4
HLA-A	HLA class I histocompatibility antigen, A-69 alpha chain	1.8	4228	3MRKA;3W0WA	3	0	0	3
HLA-A	HLA class I histocompatibility antigen, A-32 alpha chain	1.8	4228	2BCKD;3MRKA	3	0	0	3
HLA-A	HLA class I histocompatibility antigen, A-3 alpha chain	1.8	4228	4NQXC;3MRHA;2BCKD	4	0	0	4
HLA-A	HLA class I histocompatibility antigen, A-74 alpha chain	1.8	4228	4NQXC;3MRKA	2	0	0	2
HLA-A	HLA class I histocompatibility antigen, A-43 alpha chain	1.8	4228	4NQXC;3MRKA	2	0	0	2
HLA-A	HLA class I histocompatibility antigen, A-66 alpha chain	1.8	4228	4NQXC;3MRKA	2	0	0	2
HLA-A	HLA class I histocompatibility antigen, A-36 alpha chain	1.8	4228	4NQXC;3W0WA;3MRCA	6	0	0	6
HLA-A	HLA class I histocompatibility antigen, A-34 alpha chain	1.8	4228	4NQXC;3MRKA	2	0	0	2
HLA-A	HLA class I histocompatibility antigen, A-26 alpha chain	1.8	4228	4NQXC;3MRKA	2	0	0	2
HLA-A	HLA class I histocompatibility antigen, A-29 alpha chain	1.8	4228	4NQXC;3MRKA	2	0	0	2
HLA-A	HLA class I histocompatibility antigen, A-23 alpha chain	1.8	4228	2BCKD	2	0	0	2
HLA-A	HLA class I histocompatibility antigen, A-1 alpha chain	1.8	4228	1HSBA;4NQXC;2BCKD	5	0	0	5
HLA-A	HLA class I histocompatibility antigen, A-30 alpha chain	1.8	4228	4NQXC;3MRHA;2BCKD	4	0	0	4
HLA-A	HLA class I histocompatibility antigen, A-31 alpha chain	1.8	4228	4NQXC;3MRKA	2	0	0	2
HLA-A	HLA class I histocompatibility antigen, A-80 alpha chain	1.8	4228	4NQXC	1	0	0	1
HLA-A	HLA class I histocompatibility antigen, A-25 alpha chain	1.8	4228	2AV1D;3W0WA	4	0	0	4
HLA-A	HLA class I histocompatibility antigen, A-2 alpha chain	1.8	4228	2BCKD;3MRKA	3	0	0	3
HLA-A	HLA class I histocompatibility antigen, A-68 alpha chain	1.8	4228	4NQXG;3MRKA	3	0	0	3
C4A	Complement C4-A	1.7	54	1HZFA	1	0	0	1
RAD51	DNA repair protein RAD51 homolog 1	1.7	1451	1N0WA	2	0	0	2
ITGA2B	Integrin alpha-IIb	1.7	50	2VDNA	3	0	1	2
SERPINA1	Alpha-1-antitrypsin	1.7	1973	3NE4A	3	0	0	3
CASP1	Caspase-1	1.7	776	3E4CA	2	1	0	1
TLR10	Toll-like receptor 10	1.7	27	2J67B	2	0	0	2
TPSB2	Tryptase beta-2	1.7	0	2F9OD	3*	1	0	2
LDHA	L-lactate dehydrogenase A chain	1.7	121	4L4RH	2*	1	1	0
NR1I2	Nuclear receptor subfamily 1 group I member 2	1.7	38	3CTBA	3*	1	1	1
PDE1B	Calcium/calmodulin-dependent 3',5'-cyclic nucleotide phosphodiesterase 1B	1.7	4	4NPVA	2*	1	0	1
ARHGDIB	Rho GDP-dissociation inhibitor 2	1.7	96	1DS6B	2	0	1	1
ACTN2	Alpha-actinin-2	1.7	9	1HCIA;1WKUA	2	0	0	2
TPSAB1	Tryptase alpha/beta-1	1.7	16	2F9OD	3*	1	0	2
ARHGAP15	Rho GTPase-activating protein 15	1.7	5	3BYID	1	0	0	1
KLKB1	Plasma kallikrein	1.7	58	4OGXA	2	1	1	1
NRP2	Neuropilin-2	1.7	167	2QQKA	4	0	0	4
SIRPB1	Signal-regulatory protein beta-1 isoform 3	1.7	3	2WNGA	1	0	1	0
TAPBP	Tapasin	1.7	141	3F8UB	2	0	1	1
GMIP	GEM-interacting protein	1.7	4	3QWEA	2	0	0	2
ELAVL4	ELAV-like protein 4	1.7	57	1G2EA	1	0	0	1
ZG16B	Zymogen granule protein 16 homolog B	1.7	2	3AQGA	1	0	0	1
KIF2C	Kinesin-like protein KIF2C	1.7	41	2HEHA	2	1	0	1
C6	Complement component C6	1.7	4604	3T5OA	8	0	0	8
ELAVL3	ELAV-like protein 3	1.7	13	1G2EA	1	0	0	1
PPP1R13L	RelA-associated inhibitor	1.7	77	2VGEA	1	0	0	1
PROCR	Endothelial protein C receptor	1.7	50	3JTCA	1	0	1	0
PTPRR	Receptor-type tyrosine-protein phosphatase R	1.6	16	2A8BA	2	1	0	1
CSF1R	Macrophage colony-stimulating factor 1 receptor	1.6	2003	4LIQE	1	0	0	1
IFI16	Gamma-interferon-inducible protein 16	1.6	63	2OQ0C;3RNUA	2	0	0	2
FSCN1	Fascin	1.6	374	3P53B	2	0	0	2
NLRP1	NACHT, LRR and PYD domains-containing protein 1	1.6	24	4IM6A	2	0	0	2
IL3RA	Interleukin-3 receptor subunit alpha	1.6	76	4JZJC	1	0	0	1
HLA-DRB1	HLA class II histocompatibility antigen, DRB1-16 beta chain	1.6	772	3O6FB;4AH2B	2	0	0	2
HLA-DRB1	HLA class II histocompatibility antigen, DRB1-9 beta chain	1.6	772	4AH2B	1	0	0	1
HLA-DRB1	HLA class II histocompatibility antigen, DRB1-1 beta chain	1.6	772	4AH2B	1	0	0	1
HLA-DRB1	HLA class II histocompatibility antigen, DRB1-13 beta chain	1.6	772	3O6FB;4AH2B	2	0	0	2
HLA-DRB1	HLA class II histocompatibility antigen, DRB1-11 beta chain	1.6	772	3O6FB;4AH2B	2	0	0	2
HLA-DRB1	HLA class II histocompatibility antigen, DRB1-10 beta chain	1.6	772	4AH2B	1	0	0	1
HLA-DRB1	HLA class II histocompatibility antigen, DRB1-3 chain	1.6	772	3O6FB	1	0	0	1
HLA-DRB1	HLA class II histocompatibility antigen, DRB1-15 beta chain	1.6	772	4AH2B	1	0	0	1
HLA-DRB1	HLA class II histocompatibility antigen, DRB1-4 beta chain	1.6	772	3O6FB;4AH2B	2	0	0	2
HLA-DRB1	HLA class II histocompatibility antigen, DRB1-8 beta chain	1.6	772	3O6FB;4AH2B	2	0	0	2
PLAUR	Urokinase plasminogen activator surface receptor	1.6	926	1YWHM	3	0	2	1
TLL1	Tolloid-like protein 1	1.6	5	3EDIA	1	1	0	0
MIF	Macrophage migration inhibitory factor	1.6	631	3HOFC	1*	1	0	0
CSAD	Cysteine sulfinic acid decarboxylase	1.6	3	2JISA	5	0	3	2
TLR2	Toll-like receptor 2	1.6	606	1FYXA	1	0	0	1
SIRPA	Tyrosine-protein phosphatase non-receptor type substrate 1	1.6	57	2WNGA	1	0	1	0
TTN	Titin	1.6	133	4JNWA	3	1	0	2
S100A12	Protein S100-A12	1.6	33	2WCEB	1	0	1	0
GAPDH	Glyceraldehyde-3-phosphate dehydrogenase	1.5	1206	1ZNQO	1	1	1	0
BMX	Cytoplasmic tyrosine-protein kinase BMX	1.5	65	3SXSA	2*	1	0	1
DYSF	Dysferlin	1.5	10	4CAIC	1	0	0	1
GLIPR1	Glioma pathogenesis-related protein 1	1.5	38	3Q2RA	1	0	0	1
MMP14	Matrix metalloproteinase-14	1.5	650	3MA2A	1	1	1	0
IL4R	Interleukin-4 receptor subunit alpha	1.5	61	1IARB	1	0	0	1
BRDT	Bromodomain testis-specific protein	1.5	19	4FLPB	1*	0	0	1

## Sheet: LUAD
Protein		Cancer		Structure
Symbol	Name	FC	Cancer Publications	PDB	All	ENZ	PPI	OTH
ALB	Serum albumin	10.1	8554	2BXAB	10*	0	1	9
FGB	Fibrinogen beta chain	9.2	21	3GHGE	1	0	0	1
MAGEA4	Melanoma-associated antigen 4	9	142	2WA0A	1	0	0	1
GC	Vitamin D-binding protein	8.7	7627	1J78A	6	0	2	4
F2	Prothrombin	8.3	3275	4NZQA	6	0	0	6
CPN1	Carboxypeptidase N catalytic chain	7.8	0	2NSMA	2	0	0	2
AKR1B10	Aldo-keto reductase family 1 member B10	7.7	115	4JIIX	1*	1	0	0
UGT2B11	UDP-glucuronosyltransferase 2B11	7.7	6	2O6LA	1	0	0	1
AKR1C4	Aldo-keto reductase family 1 member C4	7.2	25	2FVLC	2	1	0	1
CPS1	Carbamoyl-phosphate synthase [ammonia], mitochondrial	7.2	29	2YVQA	1	0	0	1
PAH	Phenylalanine-4-hydroxylase	7	1475	1J8UA	3*	1	0	2
BRDT	Bromodomain testis-specific protein	6.9	19	4FLPB	1*	0	0	1
FAM83A	Protein FAM83A	6.9	10	4URJD	1	0	0	1
TCN1	Transcobalamin-1	6.8	9	4KKJA	4	0	0	4
FABP7	Fatty acid-binding protein, brain	6.3	123	1FE3A	1	0	0	1
CALML3	Calmodulin-like protein 3	6.3	5	1GGZA	2	0	0	2
MMP13	Collagenase 3	6.3	317	4FVLA	2	0	1	1
DPYSL5	Dihydropyrimidinase-related protein 5	6.2	43	4B90B	2	0	0	2
PGLYRP3	Peptidoglycan recognition protein 3	6.2	1	2APHA	1	0	0	1
CHAT	Choline O-acetyltransferase	6.2	353	2FY4A	6	1	0	5
CA9	Carbonic anhydrase 9	6	872	3IAIC	3	1	0	2
AKR7A3	Aflatoxin B1 aldehyde reductase member 3	5.9	10	2CLPJ	1	1	0	0
LIPF	Gastric triacylglycerol lipase	5.8	3	1HLGA	3	0	0	3
ACMSD	2-amino-3-carboxymuconate-6-semialdehyde decarboxylase	5.7	4	2WM1A	3	1	1	1
CRABP2	Cellular retinoic acid-binding protein 2	5.7	48	3FA9B	1*	0	0	1
NGB	Neuroglobin	5.7	33	1OJ6A	1	0	0	1
ITPKA	Inositol-trisphosphate 3-kinase A	5.6	10	1W2FA	1	1	0	0
PRDM9	Histone-lysine N-methyltransferase PRDM9	5.6	9	4IJDA	2	0	0	2
CA6	Carbonic anhydrase 6	5.3	10	3FE4A	1	1	0	0
MMP1	Interstitial collagenase	5.3	533	1SU3A	3	0	0	3
BPIFA1	BPI fold-containing family A member 1	5.3	38	4KGHB	2	0	0	2
APCS	Serum amyloid P-component	5.2	1242	1LGNE	1	0	0	1
AOC1	Amiloride-sensitive amine oxidase [copper-containing]	5.1	0	3MPHA	7	1	2	4
PTPRN	Receptor-type tyrosine-protein phosphatase-like N	5	20	2I1YB	2	0	0	2
PIWIL1	Piwi-like protein 1	5	39	3O3IX	1	0	0	1
TF	Serotransferrin	5	2509	3V8XB	5	0	1	4
DDX53	Probable ATP-dependent RNA helicase DDX53	5	17	3IUYB	2	0	0	2
NPC1L1	Niemann-Pick C1-like protein 1	4.8	14	3QNTA	2	0	0	2
TRIM72	Tripartite motif-containing protein 72	4.8	0	3KB5A	1	0	0	1
UGT2B28	UDP-glucuronosyltransferase 2B28	4.8	4	2O6LA	1	0	0	1
MIOX	Inositol oxygenase	4.8	2	2IBNA	1	1	0	0
USH1C	Harmonin	4.7	7	3K1RA	1	0	0	1
AKR1C2	Aldo-keto reductase family 1 member C2	4.7	100	4JQ4B	1	1	0	0
SERPINB5	Serpin B5	4.6	425	1XU8A	3	0	0	3
PROC	Vitamin K-dependent protein C	4.6	28555	1AUTC	1*	1	0	0
MMP3	Stromelysin-1	4.5	363	1SLMA	4*	1	0	3
XDH	Xanthine dehydrogenase/oxidase	4.5	34	2E1QD	10	1	0	9
BCL2L10	Bcl-2-like protein 10	4.4	19	4B4SA	1	0	0	1
GH2	Growth hormone variant	4.4	24	1A22A	1	0	0	1
GIF	Gastric intrinsic factor	4.4	310	2PMVD	4	0	1	3
CDC25C	M-phase inducer phosphatase 3	4.3	630	3OP3A	1	0	0	1
BHMT	Betaine--homocysteine S-methyltransferase 1	4.3	37	1LT7A	3	1	1	1
SERPINA7	Thyroxine-binding globulin	4.3	109	2CEOB	3	0	0	3
MIA	Melanoma-derived growth regulatory protein	4.3	1144	1I1JA	1	0	0	1
RHCG	Ammonium transporter Rh type C	4.3	10	3HD6A	5	0	3	2
GCKR	Glucokinase regulatory protein	4.2	14	4OLHA	6	0	0	6
HGD	Homogentisate 1,2-dioxygenase	4.2	536	1EY2A	4	1	0	3
MMP10	Stromelysin-2	4.2	90	4ILWF	1	0	1	0
GAD1	Glutamate decarboxylase 1	4.2	27	3VP6B	3	1	1	1
EPHA8	Ephrin type-A receptor 8	4.1	14	3KULB	3	1	0	2
RAB26	Ras-related protein Rab-26	4.1	3	2G6BA	2	1	0	1
MMP12	Macrophage metalloelastase	4.1	110	3BA0A	3	0	0	3
BIRC5	Baculoviral IAP repeat-containing protein 5	4.1	3230	3UEHA	1	0	0	1
TOP2A	DNA topoisomerase 2-alpha	4.1	355	4R1FA;4FM9A	8	2	0	6
MELK	Maternal embryonic leucine zipper kinase	4	61	4UMUA	4*	1	0	3
MYH6	Myosin-6	4	9	4DB1A	3	1	0	2
KIF2C	Kinesin-like protein KIF2C	4	41	2HEHA	2	1	0	1
CYP11B1	Cytochrome P450 11B1, mitochondrial	4	170	4FDHG	5	0	0	5
CASKIN1	Caskin-1	4	2	3SEIA	1	0	0	1
EXO1	Exonuclease 1	4	171	3QEBZ	3	0	0	3
CDC20	Cell division cycle protein 20 homolog	4	291	4GGDB	2*	0	0	2
SERPINB4	Serpin B4	4	7	2ZV6A	4	0	0	4
NEK2	Serine/threonine-protein kinase Nek2	3.9	113	2XK4A	3*	1	0	2
AMBP	Protein AMBP	3.9	15	4ES7A	1	0	0	1
CRP	C-reactive protein	3.9	5207	3PVOD	1	0	0	1
PCK1	Phosphoenolpyruvate carboxykinase, cytosolic [GTP]	3.8	15	2GMVA	8	2	0	6
TTK	Dual specificity protein kinase TTK	3.8	143	2ZMDA	1*	1	0	0
SULT4A1	Sulfotransferase 4A1	3.8	6	1ZD1A	1	1	0	0
PYCR1	Pyrroline-5-carboxylate reductase 1, mitochondrial	3.8	7	2IZZA	1	1	0	0
AURKB	Aurora kinase B	3.8	482	4AF3A	2*	1	0	1
APOA4	Apolipoprotein A-IV	3.7	43	3S84B	2	0	2	0
CP	Ceruloplasmin	3.7	7859	2J5WA	9	0	0	9
GDA	Guanine deaminase	3.7	387	2UZ9A	2	1	0	1
PSAT1	Phosphoserine aminotransferase	3.7	24	3E77C	2	1	0	1
HNF4G	Hepatocyte nuclear factor 4-gamma	3.6	13	1LV2A	3	0	0	3
ELAVL2	ELAV-like protein 2	3.6	24	1G2EA	1	0	0	1
UHRF1	E3 ubiquitin-protein ligase UHRF1	3.6	112	4GY5B;2PB7A	2	1	0	1
HIST1H2BH	Histone H2B type 1-H	3.6	0	3AV1D	1	0	1	0
UCHL1	Ubiquitin carboxyl-terminal hydrolase isozyme L1	3.6	323	3IFWA	2	1	1	1
MYH7	Myosin-7	3.5	19	4DB1A	3	1	0	2
RGS7	Regulator of G-protein signaling 7	3.5	6	2A72A	1	0	1	0
CCNE1	G1/S-specific cyclin-E1	3.5	266	1W98B	2	0	1	1
PLK1	Serine/threonine-protein kinase PLK1	3.5	743	1Q4KB;2OWBA	4*	1	1	2
GPT2	Alanine aminotransferase 2	3.5	3	3IHJA	5	1	0	4
AGXT	Serine--pyruvate aminotransferase	3.5	11	3R9AC	2	1	0	1
CEL	Bile salt-activated lipase	3.5	310	1F6WA	4	1	0	3
AKR1C1	Aldo-keto reductase family 1 member C1	3.5	96	4JQ4B	1	1	0	0
CBLC	E3 ubiquitin-protein ligase CBL-C	3.5	18	3VRQA	1	0	0	1
HBE1	Hemoglobin subunit epsilon	3.5	5	1A9WF	1	0	0	1
HGFAC	Hepatocyte growth factor activator	3.4	103	1YBWA	1	0	0	1
THPO	Thrombopoietin	3.4	882	1V7MX	1	0	0	1
MB	Myoglobin	3.4	14545	3RGKA	1	0	0	1
KIF15	Kinesin-like protein KIF15	3.4	9	4BN2C	4	1	0	3
F12	Coagulation factor XII	3.3	212	4BDXA	1	0	0	1
HAO1	Hydroxyacid oxidase 1	3.3	2	2NZLA	2	1	0	1
RRM2	Ribonucleoside-diphosphate reductase subunit M2	3.3	142	2UW2A	2	0	0	2
PAX2	Paired box protein Pax-2	3.3	236	1K78A	1	0	0	1
PKMYT1	Membrane-associated tyrosine- and threonine-specific cdc2-inhibitory kinase	3.3	13	3P1AA	2	1	0	1
ENO3	Beta-enolase	3.3	17	2XSXA	2	1	0	1
AKR1D1	3-oxo-5-beta-steroid 4-dehydrogenase	3.3	5	3UZWB	2	1	0	1
RET	Proto-oncogene tyrosine-protein kinase receptor Ret	3.2	3522	2IVVA;2X2UA	4*	1	0	3
NR5A1	Steroidogenic factor 1	3.2	215	2A66A;4QK4A	5	0	0	5
AK4	Adenylate kinase 4, mitochondrial	3.2	5	2BBWB	1	1	0	0
CAMK2B	Calcium/calmodulin-dependent protein kinase type II subunit beta	3.2	4	2UX0E;2V7OA	4*	1	0	3
GUCA1C	Guanylyl cyclase-activating protein 3	3.2	0	2GGZB	1	0	0	1
HIST1H2BM	Histone H2B type 1-M	3.1	1	3AV1D	1	0	1	0
SPTB	Spectrin beta chain, erythrocytic	3.1	3	1S35A;3LBXB	4	0	1	3
GFRA3	GDNF family receptor alpha-3	3.1	11	2GH0B	1	0	0	1
UGT2B10	UDP-glucuronosyltransferase 2B10	3.1	15	2O6LA	1	0	0	1
F7	Coagulation factor VII	3.1	135	1WUNH	1*	1	0	0
NQO1	NAD(P)H dehydrogenase [quinone] 1	3.1	989	4CF6A	1	0	1	0
GINS2	DNA replication complex GINS protein PSF2	3	10	2Q9QA	1	0	1	0
CCNB1	G2/mitotic-specific cyclin-B1	3	2154	2B9RB	1	0	0	1
AKR7L	Aflatoxin B1 aldehyde reductase member 4	3	0	2CLPJ	1	1	0	0
HIST1H2BO	Histone H2B type 1-O	3	1	3AV1D	1	0	1	0
CKMT1A	Creatine kinase U-type, mitochondrial	3	1	1QK1G	1	1	0	0
AIM2	Interferon-inducible protein AIM2	3	67	3RN5D	1	0	0	1
CHMP1B	Charged multivesicular body protein 1b	3	1	3EABG	1	0	0	1
ADH4	Alcohol dehydrogenase 4	3	13	3COSD	1	1	0	0
CCNA2	Cyclin-A2	3	300	2BPMD	1	0	0	1
BUB1	Mitotic checkpoint serine/threonine-protein kinase BUB1	3	378	4R8QA	4	1	0	3
HNF4A	Hepatocyte nuclear factor 4-alpha	3	168	4IQRE	2	0	1	1
EME1	Crossover junction endonuclease EME1	3	42	4P0QB	1	0	0	1
ACOT12	Acyl-coenzyme A thioesterase 12	3	0	3B7KB	3	1	0	2
THBS2	Thrombospondin-2	2.9	129	1YO8A	2	0	0	2
KIF23	Kinesin-like protein KIF23	2.9	24	3VHXH	1	0	0	1
CENPE	Centromere-associated protein E	2.9	29	1T5CA	3	1	0	2
NR1I2	Nuclear receptor subfamily 1 group I member 2	2.9	38	3CTBA	3*	1	1	1
KIF11	Kinesin-like protein KIF11	2.9	139	4AP0A	3	1	0	2
CASC5	Protein CASC5	2.9	14	4NF9B	2	0	1	1
KIFC1	Kinesin-like protein KIFC1	2.9	10	2REPA	2	1	0	1
CYP2D6	Cytochrome P450 2D6	2.9	900	3QM4A	5*	0	0	5
CNDP1	Beta-Ala-His dipeptidase	2.8	6	3DLJA	2	0	1	1
S100A5	Protein S100-A5	2.8	13	4DIRB	2	1	0	1
IL11	Interleukin-11	2.8	407	4MHLA	2	0	0	2
CA7	Carbonic anhydrase 7	2.8	12	3MDZA	1	1	0	0
EZH2	Histone-lysine N-methyltransferase EZH2	2.8	1168	4MI0A	2	0	0	2
SI	Sucrase-isomaltase, intestinal	2.8	5009	3LPPB	7*	1	0	6
HNF1A	Hepatocyte nuclear factor 1-alpha	2.8	286	1IC8A	3	0	0	3
LCN2	Neutrophil gelatinase-associated lipocalin	2.8	334	3HWGA	1	0	0	1
AURKA	Aurora kinase A	2.8	655	2J4ZB	2*	1	0	1
IL23A	Interleukin-23 subunit alpha	2.7	39	4OE8B	1	0	1	0
TK1	Thymidine kinase, cytosolic	2.7	222	2ORVB	1*	1	0	0
C8A	Complement component C8 alpha chain	2.7	1	3OJYA	7	0	1	6
MAD2L1	Mitotic spindle assembly checkpoint protein MAD2A	2.7	216	2V64F	1	0	1	0
HCN2	Potassium/sodium hyperpolarization-activated cyclic nucleotide-gated channel 2	2.7	8	3OTFA	1	1	0	0
ACTN3	Alpha-actinin-3	2.7	5	1WKUB	1	0	0	1
HCN1	Potassium/sodium hyperpolarization-activated cyclic nucleotide-gated channel 1	2.7	8	3U10A	2	0	0	2
QPCT	Glutaminyl-peptide cyclotransferase	2.7	13	3SI0A	1	0	0	1
HECW1	E3 ubiquitin-protein ligase HECW1	2.7	5	3L4HA	1	0	0	1
DIRAS1	GTP-binding protein Di-Ras1	2.6	3	2GF0A	1	1	0	0
CBX2	Chromobox protein homolog 2	2.6	16	3H91A	1	0	1	0
PLAU	Urokinase-type plasminogen activator	2.6	3633	2VNTD	1*	1	0	0
CYP2B6	Cytochrome P450 2B6	2.6	203	3QOAA	4	0	0	4
PACSIN1	Protein kinase C and casein kinase substrate in neurons protein 1	2.6	3	3HAHB	1	0	0	1
CDC25A	M-phase inducer phosphatase 1	2.6	533	1C25A	2	0	0	2
GINS4	DNA replication complex GINS protein SLD5	2.6	3	2E9XH	2	0	1	1
PKLR	Pyruvate kinase PKLR	2.6	9	4IMAA	6	1	2	4
ZG16B	Zymogen granule protein 16 homolog B	2.6	2	3AQGA	1	0	0	1
LINGO1	Leucine-rich repeat and immunoglobulin-like domain-containing nogo receptor-interacting protein 1	2.6	4	2ID5D	2	0	1	1
COL3A1	Collagen alpha-1(III) chain	2.5	39	4AE2A	1	0	0	1
PAK3	Serine/threonine-protein kinase PAK 3	2.5	28	3Q4ZB	3*	1	0	2
HIST1H2BD	Histone H2B type 1-D	2.5	1	3AV1D	1	0	1	0
CTSV	Cathepsin L2	2.5	8	3KFQB	1	1	1	0
ACHE	Acetylcholinesterase	2.5	79743	1F8UA	4*	1	0	3
CDA	Cytidine deaminase	2.5	1516	1MQ0B	1	1	1	0
TH	Tyrosine 3-monooxygenase	2.5	1360162	2XSNB	2	1	1	0
PLA2G4A	Cytosolic phospholipase A2	2.5	324	1CJYA	6	1	0	5
RAD51	DNA repair protein RAD51 homolog 1	2.5	1451	1N0WA	2	0	0	2
SERPINA5	Plasma serine protease inhibitor	2.5	55	2OL2A	3	0	0	3
RAC3	Ras-related C3 botulinum toxin substrate 3	2.4	82	4GZLB	1	1	0	0
GABBR2	Gamma-aminobutyric acid type B receptor subunit 2	2.4	2	4F11A	2	0	0	2
BLM	Bloom syndrome protein	2.4	1115	4CDGA	5	1	0	4
FAP	Prolyl endopeptidase FAP	2.4	2296	1Z68A	7	0	0	7
B3GAT1	Galactosylgalactosylxylosylprotein 3-beta-glucuronosyltransferase 1	2.4	0	1V82A	1	1	0	0
EPHB2	Ephrin type-B receptor 2	2.4	180	2QBXB;3ZFMA	3	1	1	1
IFNL2	Interferon lambda-2	2.4	0	3HHCC	1	0	0	1
KCNK2	Potassium channel subfamily K member 2	2.4	4	4TWKB	3	0	1	2
PKP1	Plakophilin-1	2.3	46	1XM9A	1	0	0	1
CYP2C19	Cytochrome P450 2C19	2.3	281	4GQSD	8*	0	0	8
SERPINA10	Protein Z-dependent protease inhibitor	2.3	11	4AJUA	5	0	0	5
EPHA5	Ephrin type-A receptor 5	2.3	29	2R2PA	1	1	0	0
MEP1B	Meprin A subunit beta	2.3	2	4GWMA	5	1	0	4
UGT2B4	UDP-glucuronosyltransferase 2B4	2.3	26	2O6LA	1	0	0	1
NME1	Nucleoside diphosphate kinase A	2.3	857	3L7UB	2	1	0	1
PTPRZ1	Receptor-type tyrosine-protein phosphatase zeta	2.3	52	3S97B	2	1	0	1
CYP2A6	Cytochrome P450 2A6	2.2	323	2PG6B	3	0	0	3
ADH1C	Alcohol dehydrogenase 1C	2.2	90	1HSZA	2	1	1	0
TYMS	Thymidylate synthase	2.2	3396	1HW4A	2*	1	0	1
CHEK1	Serine/threonine-protein kinase Chk1	2.2	75	2R0UA	1*	1	0	0
ARHGAP11B	Rho GTPase-activating protein 11B	2.2	0	3EAPA	3	0	1	2
PLK4	Serine/threonine-protein kinase PLK4	2.2	101	3COKA	3*	1	0	2
AHNAK2	Protein AHNAK2	2.2	0	4CN0B	2	0	2	0
DSP	Desmoplakin	2.2	320	1LM7A;3R6NA	2	0	0	2
STK32A	Serine/threonine-protein kinase 32A	2.2	1	4FR4E	5*	1	0	4
ORM2	Alpha-1-acid glycoprotein 2	2.2	15	3APUB	1*	0	0	1
ADAM8	Disintegrin and metalloproteinase domain-containing protein 8	2.2	46	4DD8A	1*	1	0	0
CYP2C9	Cytochrome P450 2C9	2.2	327	1R9OA	5	0	0	5
ERO1L	ERO1-like protein alpha	2.2	11	3AHQA	5	1	0	4
UBE2U	Ubiquitin-conjugating enzyme E2 U	2.2	0	1YRVA	1	0	0	1
NR1H4	Bile acid receptor	2.2	48	3BEJB	3*	0	0	3
TPH2	Tryptophan 5-hydroxylase 2	2.2	11	4V06A	2	1	1	0
ARHGAP11A	Rho GTPase-activating protein 11A	2.2	1	3EAPA	3	0	1	2
SERPINB3	Serpin B3	2.2	33	2ZV6A	4	0	0	4
ELAVL4	ELAV-like protein 4	2.2	57	1G2EA	1	0	0	1
RCC1	Regulator of chromosome condensation	2.1	56	1A12A	1	0	0	1
DDC	Aromatic-L-amino-acid decarboxylase	2.1	325	3RBFA	4	1	1	2
MMP9	Matrix metalloproteinase-9	2.1	6042	1ITVA;1L6JA	6	1	0	5
MMP7	Matrilysin	2.1	619	2Y6DA	1*	1	0	0
ELAVL3	ELAV-like protein 3	2.1	13	1G2EA	1	0	0	1
HIST1H2BL	Histone H2B type 1-L	2.1	2	3AV1D	1	0	1	0
SCN5A	Sodium channel protein type 5 subunit alpha	2.1	43	4DCKA	1	0	1	0
KPNA2	Importin subunit alpha-1	2	47	4E4VB	1	0	0	1
AKR1C3	Aldo-keto reductase family 1 member C3	2	193	1S2AA	2	1	0	1
CFB	Complement factor B	2	94	2OK5A	8	1	0	7
EYA2	Eyes absent homolog 2	2	26	4EGCB	1	0	0	1
NT5E	5'-nucleotidase	2	869	4H2BA	4	1	0	3
CARD11	Caspase recruitment domain-containing protein 11	2	93	4LWDA	1	0	0	1
HIST1H2BC	Histone H2B type 1-C/E/F/G/I	2	1	3AV1D	1	0	1	0
ALDH3A1	Aldehyde dehydrogenase, dimeric NADP-preferring	2	66	3SZAB	4*	1	0	3
UGDH	UDP-glucose 6-dehydrogenase	1.9	14	4QEJA	1	1	0	0
ABCB6	ATP-binding cassette sub-family B member 6, mitochondrial	1.9	22	3NHBA	3	1	0	2
CENPM	Centromere protein M	1.9	0	4P0TA	1	0	0	1
PAICS	Multifunctional protein ADE2	1.9	8	2H31A	2	0	0	2
TAT	Tyrosine aminotransferase	1.9	2048	3DYDB	2	0	0	2
UCK2	Uridine-cytidine kinase 2	1.9	17	1XRJA	1	1	0	0
GSG2	Serine/threonine-protein kinase haspin	1.9	7	3DLZA	1*	1	1	0
ATAD2	ATPase family AAA domain-containing protein 2	1.9	35	4QSPA	1*	0	1	0
XYLB	Xylulose kinase	1.9	0	4BC3A	2*	1	0	1
IFNL1	Interferon lambda-1	1.9	5	3OG6A	1	0	0	1
ACE2	Angiotensin-converting enzyme 2	1.9	45	1R42A	3	1	0	2
HIST1H2BN	Histone H2B type 1-N	1.9	1	3AV1D	1	0	1	0
CBR1	Carbonyl reductase [NADPH] 1	1.9	46	2PFGA	1	1	0	0
ORM1	Alpha-1-acid glycoprotein 1	1.8	25	3KQ0A	1	0	0	1
CFHR1	Complement factor H-related protein 1	1.8	14	3SW0X	1	0	0	1
HIST1H2BJ	Histone H2B type 1-J	1.8	1	3W99D	1	0	1	0
EPHB1	Ephrin type-B receptor 1	1.8	39	3ZFXH	1	1	0	0
PDIA4	Protein disulfide-isomerase A4	1.8	7	3IDVA	1	1	0	0
TPBG	Trophoblast glycoprotein	1.8	16	4CNMA	2	0	0	2
UGT2B7	UDP-glucuronosyltransferase 2B7	1.8	109	2O6LA	1	0	0	1
MMP8	Neutrophil collagenase	1.8	53	1BZSA	2*	1	0	1
TTBK1	Tau-tubulin kinase 1	1.8	1	4BTJA	2*	1	0	1
CBR3	Carbonyl reductase [NADPH] 3	1.8	23	2HRBA	1	1	0	0
PC	Pyruvate carboxylase, mitochondrial	1.8	153533	3BG3A	3	1	0	2
TDO2	Tryptophan 2,3-dioxygenase	1.8	51	4PW8F	2	1	1	1
GAPDH	Glyceraldehyde-3-phosphate dehydrogenase	1.8	1206	1ZNQO	1	1	1	0
THEM5	Acyl-coenzyme A thioesterase THEM5	1.8	0	4AE7A	3	0	1	2
BBOX1	Gamma-butyrobetaine dioxygenase	1.8	5	3N6WA	3*	1	0	2
CYP2E1	Cytochrome P450 2E1	1.7	1033	3GPHB	4	0	0	4
WNK3	Serine/threonine-protein kinase WNK3	1.7	4	4PWNA	1	1	0	0
SYT1	Synaptotagmin-1	1.7	25	2R83A	1	0	0	1
KAT2A	Histone acetyltransferase KAT2A	1.7	20	1Z4RA;3D7CA	2	1	0	1
GRB14	Growth factor receptor-bound protein 14	1.7	30	4K81G	6	0	1	5
AQP5	Aquaporin-5	1.7	68	3D9SD	2	0	0	2
ITGB4	Integrin beta-4	1.7	423	3F7RA	1	0	0	1
GGCT	Gamma-glutamylcyclotransferase	1.7	27	3CRYB	1	1	0	0
PDK1	[Pyruvate dehydrogenase (acetyl-transferring)] kinase isozyme 1, mitochondrial	1.7	435	2Q8HA	3	1	0	2
PLAT	Tissue-type plasminogen activator	1.7	582	1A5HB	3*	1	0	2
CA12	Carbonic anhydrase 12	1.7	52	1JCZB	3*	1	0	2
EPCAM	Epithelial cell adhesion molecule	1.7	1518	4MZVA	3	0	0	3
CAPN13	Calpain-13	1.7	0	2I7AA	3	0	0	3
ALDH18A1	Delta-1-pyrroline-5-carboxylate synthase	1.7	1	2H5GB	3	1	0	2
TULP1	Tubby-related protein 1	1.7	2	2FIMB	2	0	0	2
FEN1	Flap endonuclease 1	1.6	148	1UL1Y	3	0	1	2
PROZ	Vitamin K-dependent protein Z	1.6	3	3F1SB	4	0	1	3
APLP1	Amyloid-like protein 1	1.6	19	3PMRA	1	0	0	1
CD1A	T-cell surface glycoprotein CD1a	1.6	887	1ONQA	2	0	0	2
2015-09-03	Neuronal-specific septin-3	1.6	1	3SOPA	2	1	1	1
SCIN	Adseverin	1.6	10	3FG6H	3	0	0	3
CHEK2	Serine/threonine-protein kinase Chk2	1.6	938	3I6UA	3*	1	0	2
SERPINE2	Glia-derived nexin	1.6	68	4DY7C	2	0	0	2
MIF	Macrophage migration inhibitory factor	1.6	631	3HOFC	1*	1	0	0
HSD17B1	Estradiol 17-beta-dehydrogenase 1	1.6	89	3KM0B	1	1	0	0
BACE2	Beta-secretase 2	1.6	6	3ZKQA	2*	1	0	1
TIMP1	Metalloproteinase inhibitor 1	1.6	323	1UEAB	2	0	0	2
HS3ST1	Heparan sulfate glucosamine 3-O-sulfotransferase 1	1.6	3	1ZRHA	1	1	0	0
ACOT11	Acyl-coenzyme A thioesterase 11	1.6	1	3FO5A	1	1	0	0
TXNRD1	Thioredoxin reductase 1, cytoplasmic	1.6	97	2CFYE	3	1	1	1
SULT1C2	Sulfotransferase 1C2	1.6	8	3BFXB	2	1	1	0
FIGNL1	Fidgetin-like protein 1	1.6	2	3D8BA	3	1	0	2
QPRT	Nicotinate-nucleotide pyrophosphorylase [carboxylating]	1.6	2	3LARE	1	1	0	0
MST1	Hepatocyte growth factor-like protein	1.5	180	4QT8D	2	0	0	2
SHMT2	Serine hydroxymethyltransferase, mitochondrial	1.5	11	3OU5A	4	0	1	3
GMDS	GDP-mannose 4,6 dehydratase	1.5	16	1T2AA	1	1	0	0
KIF18A	Kinesin-like protein KIF18A	1.5	15	3LREB	4	1	0	3
ST14	Suppressor of tumorigenicity 14 protein	1.5	93	3NPSA	1*	1	0	0
GAPDHS	Glyceraldehyde-3-phosphate dehydrogenase, testis-specific	1.5	3	3PFWO	1	1	0	0
HIST1H2BB	Histone H2B type 1-B	1.5	0	3W99D	1	0	1	0
AZGP1	Zinc-alpha-2-glycoprotein	1.5	67	1T80A	1	0	0	1

## Sheet: LUSC
Protein		Cancer		Structure
Symbol	Name	FC	Cancer Publications	PDB	All	ENZ	PPI	OTH
MAGEA4	Melanoma-associated antigen 4	9.5	142	2WA0A	1	0	0	1
CALML3	Calmodulin-like protein 3	9.2	5	1GGZA	2	0	0	2
RHCG	Ammonium transporter Rh type C	8.7	10	3HD6A	5	0	3	2
PGLYRP3	Peptidoglycan recognition protein 3	8.5	1	2APHA	1	0	0	1
BRDT	Bromodomain testis-specific protein	8.2	19	4FLPB	1*	0	0	1
AKR1B10	Aldo-keto reductase family 1 member B10	8.2	115	4JIIX	1*	1	0	0
FABP7	Fatty acid-binding protein, brain	8.1	123	1FE3A	1	0	0	1
DPYSL5	Dihydropyrimidinase-related protein 5	7.6	43	4B90B	2	0	0	2
MMP13	Collagenase 3	7.4	317	4FVLA	2	0	1	1
NGB	Neuroglobin	7.3	33	1OJ6A	1	0	0	1
SERPINB5	Serpin B5	7.2	425	1XU8A	3	0	0	3
MMP10	Stromelysin-2	6.9	90	4ILWF	1	0	1	0
SERPINB4	Serpin B4	6.7	7	2ZV6A	4	0	0	4
MMP3	Stromelysin-1	6.6	363	1SLMA	4*	1	0	3
FAM83A	Protein FAM83A	6.5	10	4URJD	1	0	0	1
CA9	Carbonic anhydrase 9	6.3	872	3IAIC	3	1	0	2
PKP1	Plakophilin-1	6.3	46	1XM9A	1	0	0	1
PAH	Phenylalanine-4-hydroxylase	6.1	1475	1J8UA	3*	1	0	2
NR5A1	Steroidogenic factor 1	5.9	215	2A66A;4QK4A	5	0	0	5
EPHA8	Ephrin type-A receptor 8	5.9	14	3KULB	3	1	0	2
TP63	Tumor protein 63	5.8	802	3QYNB;4A9ZD	2	0	1	1
AKR1C4	Aldo-keto reductase family 1 member C4	5.7	25	2FVLC	2	1	0	1
ADH7	Alcohol dehydrogenase class 4 mu/sigma chain	5.7	21	1D1SA	1	1	0	0
MMP12	Macrophage metalloelastase	5.7	110	3BA0A	3	0	0	3
MMP1	Interstitial collagenase	5.7	533	1SU3A	3	0	0	3
AKR1C2	Aldo-keto reductase family 1 member C2	5.6	100	4JQ4B	1	1	0	0
PRDM9	Histone-lysine N-methyltransferase PRDM9	5.6	9	4IJDA	2	0	0	2
PIWIL1	Piwi-like protein 1	5.4	39	3O3IX	1	0	0	1
CEL	Bile salt-activated lipase	5.4	310	1F6WA	4	1	0	3
CA6	Carbonic anhydrase 6	5.4	10	3FE4A	1	1	0	0
CHAT	Choline O-acetyltransferase	5.4	353	2FY4A	6	1	0	5
SULT4A1	Sulfotransferase 4A1	5.3	6	1ZD1A	1	1	0	0
HIST1H2BH	Histone H2B type 1-H	5.3	0	3AV1D	1	0	1	0
TCN1	Transcobalamin-1	5.3	9	4KKJA	4	0	0	4
GDA	Guanine deaminase	5.2	387	2UZ9A	2	1	0	1
BCL2L10	Bcl-2-like protein 10	5.1	19	4B4SA	1	0	0	1
PTPRZ1	Receptor-type tyrosine-protein phosphatase zeta	5	52	3S97B	2	1	0	1
BIRC5	Baculoviral IAP repeat-containing protein 5	5	3230	3UEHA	1	0	0	1
SERPINA12	Serpin A12	5	9	4IF8A	3	0	0	3
TTK	Dual specificity protein kinase TTK	4.9	143	2ZMDA	1*	1	0	0
CASKIN1	Caskin-1	4.8	2	3SEIA	1	0	0	1
PSAT1	Phosphoserine aminotransferase	4.8	24	3E77C	2	1	0	1
TRIM72	Tripartite motif-containing protein 72	4.8	0	3KB5A	1	0	0	1
PAX2	Paired box protein Pax-2	4.7	236	1K78A	1	0	0	1
MELK	Maternal embryonic leucine zipper kinase	4.7	61	4UMUA	4*	1	0	3
NEK2	Serine/threonine-protein kinase Nek2	4.7	113	2XK4A	3*	1	0	2
SULT2A1	Bile salt sulfotransferase	4.7	35	1J99A	3	1	0	2
GAD1	Glutamate decarboxylase 1	4.7	27	3VP6B	3	1	1	1
MYH6	Myosin-6	4.7	9	4DB1A	3	1	0	2
EXO1	Exonuclease 1	4.7	171	3QEBZ	3	0	0	3
AKR1C1	Aldo-keto reductase family 1 member C1	4.7	96	4JQ4B	1	1	0	0
AURKB	Aurora kinase B	4.7	482	4AF3A	2*	1	0	1
UCHL1	Ubiquitin carboxyl-terminal hydrolase isozyme L1	4.7	323	3IFWA	2	1	1	1
CDC20	Cell division cycle protein 20 homolog	4.6	291	4GGDB	2*	0	0	2
PMP2	Myelin P2 protein	4.6	38	3NR3A	1	0	0	1
DDX53	Probable ATP-dependent RNA helicase DDX53	4.5	17	3IUYB	2	0	0	2
SERPINB3	Serpin B3	4.5	33	2ZV6A	4	0	0	4
CTSV	Cathepsin L2	4.5	8	3KFQB	1	1	1	0
CDC25C	M-phase inducer phosphatase 3	4.5	630	3OP3A	1	0	0	1
CKMT1A	Creatine kinase U-type, mitochondrial	4.5	1	1QK1G	1	1	0	0
KIF2C	Kinesin-like protein KIF2C	4.5	41	2HEHA	2	1	0	1
TH	Tyrosine 3-monooxygenase	4.4	1360162	2XSNB	2	1	1	0
FGB	Fibrinogen beta chain	4.4	21	3GHGE	1	0	0	1
UGT2B28	UDP-glucuronosyltransferase 2B28	4.4	4	2O6LA	1	0	0	1
SERPINB2	Plasminogen activator inhibitor 2	4.4	285	2ARQA	4	0	0	4
TOP2A	DNA topoisomerase 2-alpha	4.3	355	4R1FA;4FM9A	8	2	0	6
CRABP2	Cellular retinoic acid-binding protein 2	4.3	48	3FA9B	1*	0	0	1
PKMYT1	Membrane-associated tyrosine- and threonine-specific cdc2-inhibitory kinase	4.3	13	3P1AA	2	1	0	1
PTPRN	Receptor-type tyrosine-protein phosphatase-like N	4.2	20	2I1YB	2	0	0	2
PLK1	Serine/threonine-protein kinase PLK1	4.2	743	1Q4KB;2OWBA	4*	1	1	2
APOA1	Apolipoprotein A-I	4.2	489	2A01C	6	0	0	6
CCNE1	G1/S-specific cyclin-E1	4.1	266	1W98B	2	0	1	1
CBLC	E3 ubiquitin-protein ligase CBL-C	4.1	18	3VRQA	1	0	0	1
UHRF1	E3 ubiquitin-protein ligase UHRF1	4.1	112	4GY5B;2PB7A	2	1	0	1
CPN1	Carboxypeptidase N catalytic chain	4.1	0	2NSMA	2	0	0	2
UGT2B11	UDP-glucuronosyltransferase 2B11	4.1	6	2O6LA	1	0	0	1
TGM3	Protein-glutamine gamma-glutamyltransferase E	4.1	23	1NUDB	6	1	0	5
F12	Coagulation factor XII	4.1	212	4BDXA	1	0	0	1
XDH	Xanthine dehydrogenase/oxidase	4	34	2E1QD	10	1	0	9
AK3	GTP:AMP phosphotransferase AK3, mitochondrial	4	7	1ZD8A	2	0	1	1
AK4	Adenylate kinase 4, mitochondrial	4	5	2BBWB	1	1	0	0
GRIA2	Glutamate receptor 2	4	25	2WJWA	3	0	0	3
CHMP1B	Charged multivesicular body protein 1b	4	1	3EABG	1	0	0	1
ITPKA	Inositol-trisphosphate 3-kinase A	4	10	1W2FA	1	1	0	0
RRM2	Ribonucleoside-diphosphate reductase subunit M2	3.9	142	2UW2A	2	0	0	2
DSP	Desmoplakin	3.9	320	1LM7A;3R6NA	2	0	0	2
CCNA2	Cyclin-A2	3.9	300	2BPMD	1	0	0	1
KIF23	Kinesin-like protein KIF23	3.8	24	3VHXH	1	0	0	1
GINS2	DNA replication complex GINS protein PSF2	3.8	10	2Q9QA	1	0	1	0
FST	Follistatin	3.8	354	3HH2D	2	0	0	2
EME1	Crossover junction endonuclease EME1	3.8	42	4P0QB	1	0	0	1
CHP2	Calcineurin B homologous protein 2	3.8	10	2BECA	3	0	2	1
UGT2B10	UDP-glucuronosyltransferase 2B10	3.8	15	2O6LA	1	0	0	1
ALOX12	Arachidonate 12-lipoxygenase, 12S-type	3.8	21	3D3LA	4	1	1	2
HIST1H2BM	Histone H2B type 1-M	3.8	1	3AV1D	1	0	1	0
HIST1H2BO	Histone H2B type 1-O	3.7	1	3AV1D	1	0	1	0
KIF15	Kinesin-like protein KIF15	3.7	9	4BN2C	4	1	0	3
RAD51	DNA repair protein RAD51 homolog 1	3.7	1451	1N0WA	2	0	0	2
CAMK2B	Calcium/calmodulin-dependent protein kinase type II subunit beta	3.7	4	2UX0E;2V7OA	4*	1	0	3
CCNB1	G2/mitotic-specific cyclin-B1	3.7	2154	2B9RB	1	0	0	1
KCNK2	Potassium channel subfamily K member 2	3.6	4	4TWKB	3	0	1	2
MIA	Melanoma-derived growth regulatory protein	3.6	1144	1I1JA	1	0	0	1
TK1	Thymidine kinase, cytosolic	3.6	222	2ORVB	1*	1	0	0
KIF11	Kinesin-like protein KIF11	3.6	139	4AP0A	3	1	0	2
MAD2L1	Mitotic spindle assembly checkpoint protein MAD2A	3.6	216	2V64F	1	0	1	0
CPA2	Carboxypeptidase A2	3.6	4	1AYEA	2	1	1	1
F2	Prothrombin	3.6	3275	4NZQA	6	0	0	6
ALDH3A1	Aldehyde dehydrogenase, dimeric NADP-preferring	3.5	66	3SZAB	4*	1	0	3
MIOX	Inositol oxygenase	3.5	2	2IBNA	1	1	0	0
BUB1	Mitotic checkpoint serine/threonine-protein kinase BUB1	3.5	378	4R8QA	4	1	0	3
GSTM1	Glutathione S-transferase Mu 1	3.5	1849	1YJ6A	2*	1	0	1
KIFC1	Kinesin-like protein KIFC1	3.5	10	2REPA	2	1	0	1
EPHA7	Ephrin type-A receptor 7	3.5	44	2REIA	2*	1	0	1
CPS1	Carbamoyl-phosphate synthase [ammonia], mitochondrial	3.5	29	2YVQA	1	0	0	1
PAK7	Serine/threonine-protein kinase PAK 7	3.5	29	2F57A	1	1	0	0
CDC25A	M-phase inducer phosphatase 1	3.5	533	1C25A	2	0	0	2
THEM5	Acyl-coenzyme A thioesterase THEM5	3.5	0	4AE7A	3	0	1	2
CBX2	Chromobox protein homolog 2	3.5	16	3H91A	1	0	1	0
GINS4	DNA replication complex GINS protein SLD5	3.4	3	2E9XH	2	0	1	1
CENPE	Centromere-associated protein E	3.4	29	1T5CA	3	1	0	2
GUCA1C	Guanylyl cyclase-activating protein 3	3.4	0	2GGZB	1	0	0	1
IFNL2	Interferon lambda-2	3.4	0	3HHCC	1	0	0	1
AKR1C3	Aldo-keto reductase family 1 member C3	3.4	193	1S2AA	2	1	0	1
CASC5	Protein CASC5	3.4	14	4NF9B	2	0	1	1
NUDT11	Diphosphoinositol polyphosphate phosphohydrolase 3-beta	3.4	4	3MCFA	1	0	0	1
ELAVL2	ELAV-like protein 2	3.3	24	1G2EA	1	0	0	1
AURKA	Aurora kinase A	3.3	655	2J4ZB	2*	1	0	1
NOS2	Nitric oxide synthase, inducible	3.3	1121	1NSIB	2	1	0	1
EZH2	Histone-lysine N-methyltransferase EZH2	3.3	1168	4MI0A	2	0	0	2
AKR7A3	Aflatoxin B1 aldehyde reductase member 3	3.3	10	2CLPJ	1	1	0	0
ADH1C	Alcohol dehydrogenase 1C	3.3	90	1HSZA	2	1	1	0
GAD2	Glutamate decarboxylase 2	3.2	33	2OKKA	5	1	0	4
EYA2	Eyes absent homolog 2	3.2	26	4EGCB	1	0	0	1
TPH1	Tryptophan 5-hydroxylase 1	3.2	18	1MLWA	2*	1	0	1
NTRK2	BDNF/NT-3 growth factors receptor	3.2	44	1WWBX;4ASZA	3*	1	0	2
CA12	Carbonic anhydrase 12	3.2	52	1JCZB	3*	1	0	2
GPC1	Glypican-1	3.1	61	4AD7D	6	0	0	6
ARHGAP11A	Rho GTPase-activating protein 11A	3.1	1	3EAPA	3	0	1	2
CENPM	Centromere protein M	3.1	0	4P0TA	1	0	0	1
PROC	Vitamin K-dependent protein C	3.1	28555	1AUTC	1*	1	0	0
ELAVL3	ELAV-like protein 3	3.1	13	1G2EA	1	0	0	1
SCN5A	Sodium channel protein type 5 subunit alpha	3.1	43	4DCKA	1	0	1	0
TULP1	Tubby-related protein 1	3	2	2FIMB	2	0	0	2
SI	Sucrase-isomaltase, intestinal	3	5009	3LPPB	7*	1	0	6
BLM	Bloom syndrome protein	3	1115	4CDGA	5	1	0	4
IL23A	Interleukin-23 subunit alpha	3	39	4OE8B	1	0	1	0
HBE1	Hemoglobin subunit epsilon	3	5	1A9WF	1	0	0	1
RAB26	Ras-related protein Rab-26	3	3	2G6BA	2	1	0	1
BHMT	Betaine--homocysteine S-methyltransferase 1	3	37	1LT7A	3	1	1	1
AHNAK2	Protein AHNAK2	3	0	4CN0B	2	0	2	0
TTBK1	Tau-tubulin kinase 1	3	1	4BTJA	2*	1	0	1
PYCR1	Pyrroline-5-carboxylate reductase 1, mitochondrial	2.9	7	2IZZA	1	1	0	0
EPHB3	Ephrin type-B receptor 3	2.9	52	3ZFYA;3P1IC	3	0	1	2
ITGB4	Integrin beta-4	2.9	423	3F7RA	1	0	0	1
CHEK1	Serine/threonine-protein kinase Chk1	2.9	75	2R0UA	1*	1	0	0
MARK1	Serine/threonine-protein kinase MARK1	2.9	23	2HAKH	3	1	0	2
HSD17B1	Estradiol 17-beta-dehydrogenase 1	2.9	89	3KM0B	1	1	0	0
ARHGAP11B	Rho GTPase-activating protein 11B	2.9	0	3EAPA	3	0	1	2
GPT2	Alanine aminotransferase 2	2.9	3	3IHJA	5	1	0	4
HIST1H2BL	Histone H2B type 1-L	2.8	2	3AV1D	1	0	1	0
GRM1	Metabotropic glutamate receptor 1	2.8	55	3KS9B	1	0	0	1
HIST1H2BC	Histone H2B type 1-C/E/F/G/I	2.8	1	3AV1D	1	0	1	0
KLK2	Kallikrein-2	2.8	245	4NFEA	1*	1	0	0
TF	Serotransferrin	2.8	2509	3V8XB	5	0	1	4
RLBP1	Retinaldehyde-binding protein 1	2.8	0	4CJ6A	4	0	0	4
SULT1E1	Estrogen sulfotransferase	2.8	122	1G3MA	1	1	0	0
CBR3	Carbonyl reductase [NADPH] 3	2.8	23	2HRBA	1	1	0	0
LGR5	Leucine-rich repeat-containing G-protein coupled receptor 5	2.8	304	4KNGB	4	0	0	4
PLAU	Urokinase-type plasminogen activator	2.8	3633	2VNTD	1*	1	0	0
RAC3	Ras-related C3 botulinum toxin substrate 3	2.8	82	4GZLB	1	1	0	0
GSG2	Serine/threonine-protein kinase haspin	2.8	7	3DLZA	1*	1	1	0
WASF1	Wiskott-Aldrich syndrome protein family member 1	2.8	27	4N78D	2	0	2	0
NUDT10	Diphosphoinositol polyphosphate phosphohydrolase 3-alpha	2.8	2	3MCFA	1	0	0	1
TYMS	Thymidylate synthase	2.7	3396	1HW4A	2*	1	0	1
PLK4	Serine/threonine-protein kinase PLK4	2.7	101	3COKA	3*	1	0	2
NQO1	NAD(P)H dehydrogenase [quinone] 1	2.7	989	4CF6A	1	0	1	0
SERPINE2	Glia-derived nexin	2.7	68	4DY7C	2	0	0	2
UCK2	Uridine-cytidine kinase 2	2.7	17	1XRJA	1	1	0	0
SKP2	S-phase kinase-associated protein 2	2.7	715	2ASTB	2	0	1	1
NEU2	Sialidase-2	2.7	18	4NCSA	3*	1	0	2
EPHB1	Ephrin type-B receptor 1	2.7	39	3ZFXH	1	1	0	0
GH2	Growth hormone variant	2.7	24	1A22A	1	0	0	1
FSCN1	Fascin	2.6	374	3P53B	2	0	0	2
PHGDH	D-3-phosphoglycerate dehydrogenase	2.6	31	2G76B	1	1	0	0
GGH	Gamma-glutamyl hydrolase	2.6	244	1L9XA	2	1	0	1
BBOX1	Gamma-butyrobetaine dioxygenase	2.6	5	3N6WA	3*	1	0	2
KLK4	Kallikrein-4	2.6	92	4K8YA	1*	1	0	0
KPNA2	Importin subunit alpha-1	2.6	47	4E4VB	1	0	0	1
RAB6B	Ras-related protein Rab-6B	2.6	3	3BBPC	1	1	0	0
IL11	Interleukin-11	2.6	407	4MHLA	2	0	0	2
CNDP1	Beta-Ala-His dipeptidase	2.6	6	3DLJA	2	0	1	1
GAPDH	Glyceraldehyde-3-phosphate dehydrogenase	2.5	1206	1ZNQO	1	1	1	0
ALDH1L1	Cytosolic 10-formyltetrahydrofolate dehydrogenase	2.5	22	2CFIA	1	1	0	0
DDX25	ATP-dependent RNA helicase DDX25	2.5	1	2RB4B	1	0	1	0
USH1C	Harmonin	2.5	7	3K1RA	1	0	0	1
HIST1H2BJ	Histone H2B type 1-J	2.5	1	3W99D	1	0	1	0
HECW1	E3 ubiquitin-protein ligase HECW1	2.5	5	3L4HA	1	0	0	1
PSPH	Phosphoserine phosphatase	2.5	43	1L8OA	1	1	0	0
AKR1D1	3-oxo-5-beta-steroid 4-dehydrogenase	2.5	5	3UZWB	2	1	0	1
HIST1H2BB	Histone H2B type 1-B	2.5	0	3W99D	1	0	1	0
LINGO1	Leucine-rich repeat and immunoglobulin-like domain-containing nogo receptor-interacting protein 1	2.5	4	2ID5D	2	0	1	1
PKLR	Pyruvate kinase PKLR	2.5	9	4IMAA	6	1	2	4
AIM2	Interferon-inducible protein AIM2	2.5	67	3RN5D	1	0	0	1
KIF18A	Kinesin-like protein KIF18A	2.4	15	3LREB	4	1	0	3
SCML2	Sex comb on midleg-like protein 2	2.4	5	2BIVB	1	0	0	1
CA7	Carbonic anhydrase 7	2.4	12	3MDZA	1	1	0	0
CHEK2	Serine/threonine-protein kinase Chk2	2.4	938	3I6UA	3*	1	0	2
MMP9	Matrix metalloproteinase-9	2.4	6042	1ITVA;1L6JA	6	1	0	5
ABCB6	ATP-binding cassette sub-family B member 6, mitochondrial	2.4	22	3NHBA	3	1	0	2
TPBG	Trophoblast glycoprotein	2.4	16	4CNMA	2	0	0	2
CYP2C19	Cytochrome P450 2C19	2.4	281	4GQSD	8*	0	0	8
FOLH1	Glutamate carboxypeptidase 2	2.4	26	4MCQA	4*	1	0	3
PTGR1	Prostaglandin reductase 1	2.4	7	1ZSVD	2	1	0	1
SYT1	Synaptotagmin-1	2.4	25	2R83A	1	0	0	1
EPO	Erythropoietin	2.3	5134	1EERA	2	0	0	2
MIF	Macrophage migration inhibitory factor	2.3	631	3HOFC	1*	1	0	0
ACOT12	Acyl-coenzyme A thioesterase 12	2.3	0	3B7KB	3	1	0	2
GSTA1	Glutathione S-transferase A1	2.3	169	1USBB	2	1	0	1
FEN1	Flap endonuclease 1	2.3	148	1UL1Y	3	0	1	2
PAICS	Multifunctional protein ADE2	2.3	8	2H31A	2	0	0	2
AMBP	Protein AMBP	2.3	15	4ES7A	1	0	0	1
ATAD2	ATPase family AAA domain-containing protein 2	2.3	35	4QSPA	1*	0	1	0
IFNL3	Interferon lambda-3	2.3	7	3HHCC	1	0	0	1
ERO1L	ERO1-like protein alpha	2.3	11	3AHQA	5	1	0	4
RCC1	Regulator of chromosome condensation	2.3	56	1A12A	1	0	0	1
DIRAS1	GTP-binding protein Di-Ras1	2.3	3	2GF0A	1	1	0	0
DMC1	Meiotic recombination protein DMC1/LIM15 homolog	2.3	54	4HYYD	2	0	0	2
NME1	Nucleoside diphosphate kinase A	2.3	857	3L7UB	2	1	0	1
TP73	Tumor protein p73	2.2	149	3VD0D	2	0	0	2
HNF4G	Hepatocyte nuclear factor 4-gamma	2.2	13	1LV2A	3	0	0	3
GSTM2	Glutathione S-transferase Mu 2	2.2	47	2C4JD	1	1	0	0
FKBP4	Peptidyl-prolyl cis-trans isomerase FKBP4	2.2	48	1P5QB	1	0	0	1
PDK1	[Pyruvate dehydrogenase (acetyl-transferring)] kinase isozyme 1, mitochondrial	2.2	435	2Q8HA	3	1	0	2
SORD	Sorbitol dehydrogenase	2.2	47	1PL8A	2	1	0	1
UGT2B7	UDP-glucuronosyltransferase 2B7	2.2	109	2O6LA	1	0	0	1
HIST1H2BD	Histone H2B type 1-D	2.1	1	3AV1D	1	0	1	0
JUP	Junction plakoglobin	2.1	164	3IFQA	2	0	1	1
HGFAC	Hepatocyte growth factor activator	2.1	103	1YBWA	1	0	0	1
GINS3	DNA replication complex GINS protein PSF3	2.1	4	2Q9QH	1	0	1	0
IFNL1	Interferon lambda-1	2.1	5	3OG6A	1	0	0	1
ZG16B	Zymogen granule protein 16 homolog B	2.1	2	3AQGA	1	0	0	1
HCN2	Potassium/sodium hyperpolarization-activated cyclic nucleotide-gated channel 2	2.1	8	3OTFA	1	1	0	0
FIGNL1	Fidgetin-like protein 1	2.1	2	3D8BA	3	1	0	2
NUDT1	7,8-dihydro-8-oxoguanine triphosphatase	2.1	18	3Q93A	1	1	0	0
EPHB2	Ephrin type-B receptor 2	2.1	180	2QBXB;3ZFMA	3	1	1	1
PC	Pyruvate carboxylase, mitochondrial	2	153533	3BG3A	3	1	0	2
ADA	Adenosine deaminase	2	1819	3IARA	2	1	0	1
SHMT2	Serine hydroxymethyltransferase, mitochondrial	2	11	3OU5A	4	0	1	3
2015-09-03	Neuronal-specific septin-3	2	1	3SOPA	2	1	1	1
TBX1	T-box transcription factor TBX1	2	20	4A04B	2	0	0	2
GGCT	Gamma-glutamylcyclotransferase	2	27	3CRYB	1	1	0	0
THBS2	Thrombospondin-2	2	129	1YO8A	2	0	0	2
GMPS	GMP synthase [glutamine-hydrolyzing]	2	48	2VXOA	7	1	0	6
GPI	Glucose-6-phosphate isomerase	2	3439	1JIQA	2	1	1	0
FGFR3	Fibroblast growth factor receptor 3	2	752	4K33A	1	1	0	0
ABCC1	Multidrug resistance-associated protein 1	2	1135	4C3ZA	1	1	0	0
CBR1	Carbonyl reductase [NADPH] 1	2	46	2PFGA	1	1	0	0
XYLB	Xylulose kinase	2	0	4BC3A	2*	1	0	1
CYP2C9	Cytochrome P450 2C9	2	327	1R9OA	5	0	0	5
HGD	Homogentisate 1,2-dioxygenase	2	536	1EY2A	4	1	0	3
HS3ST3A1	Heparan sulfate glucosamine 3-O-sulfotransferase 3A1	2	2	1T8UB	1	1	0	0
ME1	NADP-dependent malic enzyme	2	53	3WJAB	5	1	0	4
GRM5	Metabotropic glutamate receptor 5	2	29	3LMKB	5	0	0	5
CYP3A4	Cytochrome P450 3A4	2	1534	4K9VA	5	0	0	5
ZWILCH	Protein zwilch homolog	2	8	3IF8B	2	0	0	2
PIR	Pirin	1.9	137	3ACLA	1*	1	0	0
DVL3	Segment polarity protein dishevelled homolog DVL-3	1.9	24	3CBYB	1	0	1	0
SEC14L2	SEC14-like protein 2	1.9	14	1OLMC	5	0	0	5
RET	Proto-oncogene tyrosine-protein kinase receptor Ret	1.9	3522	2IVVA;2X2UA	4*	1	0	3
MB	Myoglobin	1.9	14545	3RGKA	1	0	0	1
WNK3	Serine/threonine-protein kinase WNK3	1.9	4	4PWNA	1	1	0	0
RANBP1	Ran-specific GTPase-activating protein	1.9	21	1K5DE	1	0	1	0
ARHGEF4	Rho guanine nucleotide exchange factor 4	1.9	13	2DX1A	3	0	0	3
PPIF	Peptidyl-prolyl cis-trans isomerase F, mitochondrial	1.9	3	3RDCA	1*	1	0	0
DCUN1D1	DCN1-like protein 1	1.9	12	3TDUA	1	0	1	0
PROZ	Vitamin K-dependent protein Z	1.9	3	3F1SB	4	0	1	3
ELAVL4	ELAV-like protein 4	1.9	57	1G2EA	1	0	0	1
CKS2	Cyclin-dependent kinases regulatory subunit 2	1.9	51	1CKSC	1	0	0	1
ANXA8	Annexin A8	1.9	2071	1W45B	1	0	0	1
AOC1	Amiloride-sensitive amine oxidase [copper-containing]	1.9	0	3MPHA	7	1	2	4
DDX39A	ATP-dependent RNA helicase DDX39A	1.8	8	1XTIA	2	1	1	0
MMP7	Matrilysin	1.8	619	2Y6DA	1*	1	0	0
SUV39H2	Histone-lysine N-methyltransferase SUV39H2	1.8	16	2R3AA	4	1	0	3
GAN	Gigaxonin	1.8	26152	3HVEA	1	0	0	1
PAK1	Serine/threonine-protein kinase PAK 1	1.8	445	3Q4ZB	3*	1	0	2
H2AFY2	Core histone macro-H2A.2	1.8	3	2XD7B	1	0	0	1
G6PD	Glucose-6-phosphate 1-dehydrogenase	1.8	404	1QKIH	5	1	0	4
TPI1	Triosephosphate isomerase	1.8	99	2VOMD	2	1	1	0
NCS1	Neuronal calcium sensor 1	1.8	9	1G8IB	3	0	2	1
CP	Ceruloplasmin	1.8	7859	2J5WA	9	0	0	9
GAMT	Guanidinoacetate N-methyltransferase	1.8	12	3ORHD	1	1	0	0
HPRT1	Hypoxanthine-guanine phosphoribosyltransferase	1.7	1145	4IJQD	1*	1	0	0
SERPINC1	Antithrombin-III	1.7	782	4EB1I	4	0	0	4
ALDOC	Fructose-bisphosphate aldolase C	1.7	8	1XFBA	3	1	0	2
UNG	Uracil-DNA glycosylase	1.7	419	2OYTA	1	1	0	0
AHCY	Adenosylhomocysteinase	1.7	98	3NJ4D	3	1	1	1
PACSIN1	Protein kinase C and casein kinase substrate in neurons protein 1	1.7	3	3HAHB	1	0	0	1
F7	Coagulation factor VII	1.7	135	1WUNH	1*	1	0	0
STARD5	StAR-related lipid transfer protein 5	1.7	4	2R55B	1	0	0	1
FBL	rRNA 2'-O-methyltransferase fibrillarin	1.7	107	2IPXA	1	1	0	0
KIF3C	Kinesin-like protein KIF3C	1.7	7	3B6VA	2	1	1	1
TOPBP1	DNA topoisomerase 2-binding protein 1	1.7	106	3AL3A;3OLCX	2	0	1	1
NMNAT3	Nicotinamide mononucleotide adenylyltransferase 3	1.7	0	1NUQA	1	1	0	0
DTYMK	Thymidylate kinase	1.7	58	2XX3A	1	1	0	0
COL3A1	Collagen alpha-1(III) chain	1.7	39	4AE2A	1	0	0	1
TBL1XR1	F-box-like/WD repeat-containing protein TBL1XR1	1.7	23	4LG9A;2XTCB	2	0	0	2
PRLR	Prolactin receptor	1.7	331	3D48R	1	0	0	1
KAT2A	Histone acetyltransferase KAT2A	1.7	20	1Z4RA;3D7CA	2	1	0	1
MAPK12	Mitogen-activated protein kinase 12	1.7	46	1CM8A	4	1	0	3
FAP	Prolyl endopeptidase FAP	1.7	2296	1Z68A	7	0	0	7
ACOT11	Acyl-coenzyme A thioesterase 11	1.6	1	3FO5A	1	1	0	0
DDR1	Epithelial discoidin domain-containing receptor 1	1.6	116	4AG4A;3ZOSB	5*	1	1	4
FXR1	Fragile X mental retardation syndrome-related protein 1	1.6	19	3KUFA	2	0	0	2
EGFR	Epidermal growth factor receptor	1.6	34335	3QWQA;3GOPA	5*	1	0	4
ULBP3	NKG2D ligand 3	1.6	47	1KCGC	1	0	0	1
NPC1L1	Niemann-Pick C1-like protein 1	1.6	14	3QNTA	2	0	0	2
CAD	CAD protein	1.6	2317	4C6MA	3	1	0	2
MYH7	Myosin-7	1.6	19	4DB1A	3	1	0	2
RARG	Retinoic acid receptor gamma	1.6	188	2LBDA	3*	0	0	3
KIF7	Kinesin-like protein KIF7	1.6	12	4A14A	4	1	0	3
MAPK6	Mitogen-activated protein kinase 6	1.6	32	2I6LB	4	1	0	3
RHOD	Rho-related GTP-binding protein RhoD	1.6	37	2J1LA	1	1	0	0
RRM1	Ribonucleoside-diphosphate reductase large subunit	1.6	315	3HNCA	4	2	1	2
RUVBL1	RuvB-like 1	1.6	47	2C9OB	5	1	0	4
OTUB2	Ubiquitin thioesterase OTUB2	1.6	2	4FJVC	1	0	1	0
TARS	Threonine--tRNA ligase, cytoplasmic	1.6	629	4HWTB	1	1	0	0
KIF22	Kinesin-like protein KIF22	1.6	9	3BFNA	4	1	0	3
PDIA4	Protein disulfide-isomerase A4	1.6	7	3IDVA	1	1	0	0
PGD	6-phosphogluconate dehydrogenase, decarboxylating	1.6	230	2JKVD	2	1	2	0
DDIT4	DNA damage-inducible transcript 4 protein	1.6	77	3LQ9A	2	0	0	2
CDK4	Cyclin-dependent kinase 4	1.6	3577	3G33A	3	1	0	2
RAE1	mRNA export factor	1.6	74	3MMYC	2	0	1	1
VRK1	Serine/threonine-protein kinase VRK1	1.6	38	3OP5D	4*	1	0	3
UGDH	UDP-glucose 6-dehydrogenase	1.6	14	4QEJA	1	1	0	0
GAPDHS	Glyceraldehyde-3-phosphate dehydrogenase, testis-specific	1.6	3	3PFWO	1	1	0	0
ANK1	Ankyrin-1	1.6	23	3UD2C;1N11A	3	0	1	2
PRIM2	DNA primase large subunit	1.5	2	4BPUD;3L9QA	6	0	0	6
CPOX	Oxygen-dependent coproporphyrinogen-III oxidase, mitochondrial	1.5	7	2AEXA	1	1	0	0
MSH6	DNA mismatch repair protein Msh6	1.5	989	2O8DB	9	1	0	8
KLK7	Kallikrein-7	1.5	71	3BSQA	2	1	0	1
RAP2B	Ras-related protein Rap-2b	1.5	14	1KAOA	2	1	0	1
SERPINI1	Neuroserpin	1.5	18	3FGQA	1	0	0	1
DNM1	Dynamin-1	1.5	14	2X2EA	3	1	1	2
SPHK1	Sphingosine kinase 1	1.5	306	4L02B	1	1	0	0
TBC1D7	TBC1 domain family member 7	1.5	4	3QWLA	1	0	0	1
THPO	Thrombopoietin	1.5	882	1V7MX	1	0	0	1
TFRC	Transferrin receptor protein 1	1.5	70	1DE4I	5	0	0	5
PRTFDC1	Phosphoribosyltransferase domain-containing protein 1	1.5	2	2JBHB	2	1	0	1
PGAM5	Serine/threonine-protein phosphatase PGAM5, mitochondrial	1.5	7	3O0TB	1	0	0	1
LIG1	DNA ligase 1	1.5	41	1X9NA	4	1	0	3
MMP14	Matrix metalloproteinase-14	1.5	650	3MA2A	1	1	1	0

## Sheet: THCA
Protein		Cancer		Structure
Symbol	Name	FC	Cancer Publications	PDB	All	ENZ	PPI	OTH
WIF1	Wnt inhibitory factor 1	8.5	197	2YGPA	1	0	0	1
MMP13	Collagenase 3	7.3	317	4FVLA	2	0	1	1
GABRB2	Gamma-aminobutyric acid receptor subunit beta-2	7.3	2	4COFE	1	0	0	1
KLK7	Kallikrein-7	6.3	71	3BSQA	2	1	0	1
TCN1	Transcobalamin-1	6	9	4KKJA	4	0	0	4
REN	Renin	5.9	7523	4AMTA	2*	1	2	0
PLA2G10	Group 10 secretory phospholipase A2	5.7	5	4UY1A	1*	1	0	0
FN1	Fibronectin	5.7	6799	3M7PA	3	0	0	3
AKR1B10	Aldo-keto reductase family 1 member B10	5.6	115	4JIIX	1*	1	0	0
PNLIP	Pancreatic triacylglycerol lipase	5.4	8	1LPBB	2	1	0	1
RXRG	Retinoic acid receptor RXR-gamma	5.3	6	2GL8B	3	0	1	2
CHAT	Choline O-acetyltransferase	5.1	353	2FY4A	6	1	0	5
ALK	ALK tyrosine kinase receptor	5.1	2868	4MKCA	2*	1	0	1
LCN2	Neutrophil gelatinase-associated lipocalin	5	334	3HWGA	1	0	0	1
CHI3L1	Chitinase-3-like protein 1	5	194	1HJVA	2	1	0	1
ACOT12	Acyl-coenzyme A thioesterase 12	4.9	0	3B7KB	3	1	0	2
HCN4	Potassium/sodium hyperpolarization-activated cyclic nucleotide-gated channel 4	4.7	2	3OTFA	1	1	0	0
C8A	Complement component C8 alpha chain	4.7	1	3OJYA	7	0	1	6
SERPINA1	Alpha-1-antitrypsin	4.7	1973	3NE4A	3	0	0	3
AZU1	Azurocidin	4.6	13	1AE5A	1	1	0	0
DPP4	Dipeptidyl peptidase 4	4.6	547	2QTBB	6	1	0	5
DPYSL5	Dihydropyrimidinase-related protein 5	4.4	43	4B90B	2	0	0	2
SERPINB5	Serpin B5	4.4	425	1XU8A	3	0	0	3
NTRK1	High affinity nerve growth factor receptor	4.4	125	4AOJC;1HE7A	5*	1	1	3
CD1A	T-cell surface glycoprotein CD1a	4.3	887	1ONQA	2	0	0	2
SULT4A1	Sulfotransferase 4A1	4.3	6	1ZD1A	1	1	0	0
ROS1	Proto-oncogene tyrosine-protein kinase ROS	4.3	256	3ZBFA	1*	1	0	0
ANXA8	Annexin A8	4.2	2071	1W45B	1	0	0	1
MMP7	Matrilysin	4.1	619	2Y6DA	1*	1	0	0
MMP10	Stromelysin-2	4.1	90	4ILWF	1	0	1	0
PAX2	Paired box protein Pax-2	3.9	236	1K78A	1	0	0	1
ANXA8L2	Annexin A8-like protein 2	3.9	0	1W45B	1	0	0	1
SYT1	Synaptotagmin-1	3.9	25	2R83A	1	0	0	1
APOH	Beta-2-glycoprotein 1	3.8	16	4JHSA	1	0	0	1
AHNAK2	Protein AHNAK2	3.8	0	4CN0B	2	0	2	0
KLK5	Kallikrein-5	3.8	73	2PSYA	1	0	0	1
MMP1	Interstitial collagenase	3.8	533	1SU3A	3	0	0	3
EPHB3	Ephrin type-B receptor 3	3.7	52	3ZFYA;3P1IC	3	0	1	2
PDE4C	cAMP-specific 3',5'-cyclic phosphodiesterase 4C	3.7	6	2QYMA	1	1	0	0
CAPN8	Calpain-8	3.7	2	2NQAB	2*	1	0	1
ELAVL3	ELAV-like protein 3	3.7	13	1G2EA	1	0	0	1
CALML3	Calmodulin-like protein 3	3.7	5	1GGZA	2	0	0	2
PIWIL1	Piwi-like protein 1	3.7	39	3O3IX	1	0	0	1
RAB27B	Ras-related protein Rab-27B	3.6	22	2F7SB	1	0	0	1
GRM5	Metabotropic glutamate receptor 5	3.5	29	3LMKB	5	0	0	5
MMP3	Stromelysin-1	3.5	363	1SLMA	4*	1	0	3
QPCT	Glutaminyl-peptide cyclotransferase	3.5	13	3SI0A	1	0	0	1
SERPINB3	Serpin B3	3.4	33	2ZV6A	4	0	0	4
PLAU	Urokinase-type plasminogen activator	3.4	3633	2VNTD	1*	1	0	0
AOC1	Amiloride-sensitive amine oxidase [copper-containing]	3.4	0	3MPHA	7	1	2	4
GSTA1	Glutathione S-transferase A1	3.4	169	1USBB	2	1	0	1
CA7	Carbonic anhydrase 7	3.3	12	3MDZA	1	1	0	0
GCKR	Glucokinase regulatory protein	3.3	14	4OLHA	6	0	0	6
GALE	UDP-glucose 4-epimerase	3.3	984	1EK6B	1	1	0	0
C8B	Complement component C8 beta chain	3.3	2	3OJYB	8	0	2	6
ALOX15B	Arachidonate 15-lipoxygenase B	3.2	19	4NREA	5	1	0	4
CCL17	C-C motif chemokine 17	3.2	149	1NR4D	1	0	0	1
RHCG	Ammonium transporter Rh type C	3.2	10	3HD6A	5	0	3	2
CYP1B1	Cytochrome P450 1B1	3.1	886	3PM0A	8	0	0	8
TIAM1	T-lymphoma invasion and metastasis-inducing protein 1	3.1	193	4K2PB	2	0	0	2
TIMP1	Metalloproteinase inhibitor 1	3.1	323	1UEAB	2	0	0	2
ALOX5	Arachidonate 5-lipoxygenase	3.1	399	3O8YA	7	1	0	6
PNMT	Phenylethanolamine N-methyltransferase	3	82	4MIKA	1*	1	0	0
MMP16	Matrix metalloproteinase-16	3	50	1RM8A	2*	1	0	1
FOLH1	Glutamate carboxypeptidase 2	2.8	26	4MCQA	4*	1	0	3
CFTR	Cystic fibrosis transmembrane conductance regulator	2.8	401	1XMIB	2	1	0	1
STK32A	Serine/threonine-protein kinase 32A	2.8	1	4FR4E	5*	1	0	4
SERPINB2	Plasminogen activator inhibitor 2	2.8	285	2ARQA	4	0	0	4
PRSS57	Serine protease 57	2.8	0	4Q7ZA	1*	1	0	0
GABBR2	Gamma-aminobutyric acid type B receptor subunit 2	2.7	2	4F11A	2	0	0	2
HCN2	Potassium/sodium hyperpolarization-activated cyclic nucleotide-gated channel 2	2.7	8	3OTFA	1	1	0	0
IFNA1	Interferon alpha-1/13	2.7	11	3UX9C	2	0	0	2
XDH	Xanthine dehydrogenase/oxidase	2.7	34	2E1QD	10	1	0	9
SERPINB4	Serpin B4	2.7	7	2ZV6A	4	0	0	4
MET	Hepatocyte growth factor receptor	2.7	18003	2UZXD;3C1XA	10*	1	0	9
CA12	Carbonic anhydrase 12	2.6	52	1JCZB	3*	1	0	2
TP63	Tumor protein 63	2.6	802	3QYNB;4A9ZD	2	0	1	1
PCSK9	Proprotein convertase subtilisin/kexin type 9	2.6	34	2P4EA	5	1	2	3
PDE5A	cGMP-specific 3',5'-cyclic phosphodiesterase	2.6	41	3BJCA;1XP0A	5*	2	0	3
PROC	Vitamin K-dependent protein C	2.6	28555	1AUTC	1*	1	0	0
MACROD2	O-acetyl-ADP-ribose deacetylase MACROD2	2.5	7	4IQYA	2	1	0	1
ORM2	Alpha-1-acid glycoprotein 2	2.5	15	3APUB	1*	0	0	1
ACBD7	Acyl-CoA-binding domain-containing protein 7	2.5	0	3EPYB	1	0	1	0
PLXNC1	Plexin-C1	2.4	10	3NVNB	4	0	1	3
AQP5	Aquaporin-5	2.4	68	3D9SD	2	0	0	2
DUSP6	Dual specificity protein phosphatase 6	2.4	113	1MKPA	1	0	0	1
S100A5	Protein S100-A5	2.4	13	4DIRB	2	1	0	1
CRABP2	Cellular retinoic acid-binding protein 2	2.3	48	3FA9B	1*	0	0	1
DPYS	Dihydropyrimidinase	2.3	40	2VR2A	1	0	0	1
S100B	Protein S100-B	2.3	191	3D0YA	1	0	1	0
HIST3H2BB	Histone H2B type 3-B	2.3	0	3W99D	1	0	1	0
TPSB2	Tryptase beta-2	2.3	0	2F9OD	3*	1	0	2
GRIA2	Glutamate receptor 2	2.3	25	2WJWA	3	0	0	3
CFI	Complement factor I	2.2	147	2XRCD	7	1	0	6
NGB	Neuroglobin	2.2	33	1OJ6A	1	0	0	1
GGCT	Gamma-glutamylcyclotransferase	2.2	27	3CRYB	1	1	0	0
ITPKA	Inositol-trisphosphate 3-kinase A	2.2	10	1W2FA	1	1	0	0
UPP1	Uridine phosphorylase 1	2.2	11	3EUFA	3	1	1	1
NUDT11	Diphosphoinositol polyphosphate phosphohydrolase 3-beta	2.2	4	3MCFA	1	0	0	1
PASK	PAS domain-containing serine/threonine-protein kinase	2.2	18	3DLSC	2	1	0	1
APCS	Serum amyloid P-component	2.2	1242	1LGNE	1	0	0	1
CTSC	Dipeptidyl peptidase 1	2.2	17	3PDFA	2*	1	0	1
CAMK1G	Calcium/calmodulin-dependent protein kinase type 1G	2.2	2	2JAMB	2*	1	0	1
MMP8	Neutrophil collagenase	2.2	53	1BZSA	2*	1	0	1
CA9	Carbonic anhydrase 9	2.1	872	3IAIC	3	1	0	2
PNP	Purine nucleoside phosphorylase	2.1	798	4ECED	2*	1	1	1
HLA-G	HLA class I histocompatibility antigen, alpha chain G	2.1	453	2DYPA	1	0	0	1
B3GAT1	Galactosylgalactosylxylosylprotein 3-beta-glucuronosyltransferase 1	2.1	0	1V82A	1	1	0	0
NRP2	Neuropilin-2	2.1	167	2QQKA	4	0	0	4
SERPINA7	Thyroxine-binding globulin	2.1	109	2CEOB	3	0	0	3
NTRK3	NT-3 growth factor receptor	2.1	145	1WWCA;3V5QB	2*	1	0	1
TGM3	Protein-glutamine gamma-glutamyltransferase E	2.1	23	1NUDB	6	1	0	5
ITGB4	Integrin beta-4	2.1	423	3F7RA	1	0	0	1
FAM83A	Protein FAM83A	2.1	10	4URJD	1	0	0	1
RNASE2	Non-secretory ribonuclease	2.1	6	1K2AA	1	1	1	0
LGR5	Leucine-rich repeat-containing G-protein coupled receptor 5	2	304	4KNGB	4	0	0	4
CDA	Cytidine deaminase	2	1516	1MQ0B	1	1	1	0
GLS2	Glutaminase liver isoform, mitochondrial	2	16	4BQMA	1	0	0	1
S100A6	Protein S100-A6	2	197	1K8UA	1	0	1	0
TPSAB1	Tryptase alpha/beta-1	2	16	2F9OD	3*	1	0	2
HDC	Histidine decarboxylase	2	745	4E1OF	3	1	1	2
RET	Proto-oncogene tyrosine-protein kinase receptor Ret	2	3522	2IVVA;2X2UA	4*	1	0	3
FABP3	Fatty acid-binding protein, heart	1.9	44	3RSWB	1	0	0	1
SULT2B1	Sulfotransferase family cytosolic 2B member 1	1.9	20	1Q1QA	4	1	0	3
HPN	Serine protease hepsin	1.9	167	3T2NB	5*	1	0	4
TGM2	Protein-glutamine gamma-glutamyltransferase 2	1.9	43	3S3PA	4*	1	0	3
INMT	Indolethylamine N-methyltransferase	1.9	6	2A14A	2	1	0	1
HPGDS	Hematopoietic prostaglandin D synthase	1.8	11	3KXOB	1*	1	0	0
2015-09-03	Neuronal-specific septin-3	1.8	1	3SOPA	2	1	1	1
ACMSD	2-amino-3-carboxymuconate-6-semialdehyde decarboxylase	1.8	4	2WM1A	3	1	1	1
FGFR3	Fibroblast growth factor receptor 3	1.8	752	4K33A	1	1	0	0
DMD	Dystrophin	1.8	239	1EG3A	1	0	0	1
CRP	C-reactive protein	1.8	5207	3PVOD	1	0	0	1
PDE9A	High affinity cGMP-specific 3',5'-cyclic phosphodiesterase 9A	1.8	9	2YY2B	1*	1	0	0
IL11	Interleukin-11	1.8	407	4MHLA	2	0	0	2
PRDM1	PR domain zinc finger protein 1	1.7	192	3DALB	1	0	0	1
ERBB3	Receptor tyrosine-protein kinase erbB-3	1.7	819	1M6BA;3LMGA	3*	1	0	2
GIPR	Gastric inhibitory polypeptide receptor	1.7	37	4HJ0B	1	0	1	0
TGFBR1	TGF-beta receptor type-1	1.7	136	3KCFD	3*	1	0	2
PLAUR	Urokinase plasminogen activator surface receptor	1.7	926	1YWHM	3	0	2	1
FAP	Prolyl endopeptidase FAP	1.7	2296	1Z68A	7	0	0	7
FCN3	Ficolin-3	1.7	9	2J60C	1	0	1	0
MST1R	Macrophage-stimulating protein receptor	1.7	29	4QT8B;3PLSA	6	1	0	5
SEC14L4	SEC14-like protein 4	1.7	0	4TLGA	7	0	0	7
TMEM173	Stimulator of interferon genes protein	1.7	3	4F9GC	1	0	0	1
MMP12	Macrophage metalloelastase	1.7	110	3BA0A	3	0	0	3
COL3A1	Collagen alpha-1(III) chain	1.7	39	4AE2A	1	0	0	1
TNFSF15	Tumor necrosis factor ligand superfamily member 15	1.7	60	3K51A	1	0	0	1
PC	Pyruvate carboxylase, mitochondrial	1.7	153533	3BG3A	3	1	0	2
CHIT1	Chitotriosidase-1	1.7	6	1WB0A	1*	1	0	0
ECE1	Endothelin-converting enzyme 1	1.7	32	3DWBA	5	1	0	4
GGT3P	Putative gamma-glutamyltranspeptidase 3	1.6	0	4GDXA;4GDXB	6	0	6	0
TH	Tyrosine 3-monooxygenase	1.6	1360162	2XSNB	2	1	1	0
LINGO1	Leucine-rich repeat and immunoglobulin-like domain-containing nogo receptor-interacting protein 1	1.6	4	2ID5D	2	0	1	1
DIRAS1	GTP-binding protein Di-Ras1	1.6	3	2GF0A	1	1	0	0
BAI3	Brain-specific angiogenesis inhibitor 3	1.6	7	4DLOA	2	0	0	2
CAPN9	Calpain-9	1.6	9	1ZIVA	1	0	0	1
BCHE	Cholinesterase	1.6	1448	4TPKA	3*	1	0	2
BCAT1	Branched-chain-amino-acid aminotransferase, cytosolic	1.6	21	2COGA	3*	1	0	2
TDO2	Tryptophan 2,3-dioxygenase	1.6	51	4PW8F	2	1	1	1
CAPN3	Calpain-3	1.6	12	4OKHC	2	0	0	2
FGF1	Fibroblast growth factor 1	1.6	507	3OJMA	1	0	1	0
ALB	Serum albumin	1.6	8554	2BXAB	10*	0	1	9
NT5E	5'-nucleotidase	1.6	869	4H2BA	4	1	0	3
QSOX1	Sulfhydryl oxidase 1	1.6	19	3LLKC	1	1	0	0
F7	Coagulation factor VII	1.6	135	1WUNH	1*	1	0	0
DDB2	DNA damage-binding protein 2	1.6	142	4E54B	3	0	0	3
CBX2	Chromobox protein homolog 2	1.6	16	3H91A	1	0	1	0
CFB	Complement factor B	1.5	94	2OK5A	8	1	0	7
PPBP	Platelet basic protein	1.5	23	1F9PA	1	0	0	1
DAPK2	Death-associated protein kinase 2	1.5	438	2A27B	1*	1	0	0
CA2	Carbonic anhydrase 2	1.5	6931	3M5TA	1	1	0	0
F12	Coagulation factor XII	1.5	212	4BDXA	1	0	0	1
FHOD1	FH1/FH2 domain-containing protein 1	1.5	13	3DADB	3	0	0	3

## Sheet: TNBC
Protein		Cancer		Structure
Symbol	Name	FC	Cancer Publications	PDB	All	ENZ	PPI	OTH
MMP13	Collagenase 3	8.6	317	4FVLA	2	0	1	1
MMP1	Interstitial collagenase	7.9	533	1SU3A	3	0	0	3
ORM1	Alpha-1-acid glycoprotein 1	7.8	25	3KQ0A	1	0	0	1
MYH7	Myosin-7	7.8	19	4DB1A	3	1	0	2
MMP9	Matrix metalloproteinase-9	6.7	6042	1ITVA;1L6JA	6	1	0	5
CA9	Carbonic anhydrase 9	5.9	872	3IAIC	3	1	0	2
BIRC5	Baculoviral IAP repeat-containing protein 5	5.6	3230	3UEHA	1	0	0	1
GABBR2	Gamma-aminobutyric acid type B receptor subunit 2	5.5	2	4F11A	2	0	0	2
TDO2	Tryptophan 2,3-dioxygenase	5.5	51	4PW8F	2	1	1	1
PGLYRP3	Peptidoglycan recognition protein 3	5.5	1	2APHA	1	0	0	1
MELK	Maternal embryonic leucine zipper kinase	5.4	61	4UMUA	4*	1	0	3
PKMYT1	Membrane-associated tyrosine- and threonine-specific cdc2-inhibitory kinase	5.4	13	3P1AA	2	1	0	1
AURKB	Aurora kinase B	5.2	482	4AF3A	2*	1	0	1
CDC20	Cell division cycle protein 20 homolog	5.1	291	4GGDB	2*	0	0	2
PLK1	Serine/threonine-protein kinase PLK1	5.1	743	1Q4KB;2OWBA	4*	1	1	2
ROS1	Proto-oncogene tyrosine-protein kinase ROS	5.1	256	3ZBFA	1*	1	0	0
EXO1	Exonuclease 1	5	171	3QEBZ	3	0	0	3
KIF2C	Kinesin-like protein KIF2C	4.9	41	2HEHA	2	1	0	1
NEK2	Serine/threonine-protein kinase Nek2	4.9	113	2XK4A	3*	1	0	2
BUB1	Mitotic checkpoint serine/threonine-protein kinase BUB1	4.9	378	4R8QA	4	1	0	3
PTPRN	Receptor-type tyrosine-protein phosphatase-like N	4.8	20	2I1YB	2	0	0	2
CDC25C	M-phase inducer phosphatase 3	4.8	630	3OP3A	1	0	0	1
PCSK9	Proprotein convertase subtilisin/kexin type 9	4.8	34	2P4EA	5	1	2	3
RRM2	Ribonucleoside-diphosphate reductase subunit M2	4.6	142	2UW2A	2	0	0	2
TTK	Dual specificity protein kinase TTK	4.5	143	2ZMDA	1*	1	0	0
HIST1H2BO	Histone H2B type 1-O	4.4	1	3AV1D	1	0	1	0
MYH6	Myosin-6	4.4	9	4DB1A	3	1	0	2
SEC14L4	SEC14-like protein 4	4.4	0	4TLGA	7	0	0	7
UHRF1	E3 ubiquitin-protein ligase UHRF1	4.4	112	4GY5B;2PB7A	2	1	0	1
KIF15	Kinesin-like protein KIF15	4.4	9	4BN2C	4	1	0	3
MMP12	Macrophage metalloelastase	4.3	110	3BA0A	3	0	0	3
CCNE1	G1/S-specific cyclin-E1	4.2	266	1W98B	2	0	1	1
TOP2A	DNA topoisomerase 2-alpha	4.2	355	4R1FA;4FM9A	8	2	0	6
CD1A	T-cell surface glycoprotein CD1a	4.2	887	1ONQA	2	0	0	2
IDO1	Indoleamine 2,3-dioxygenase 1	4.2	96	4PK5A	3	1	0	2
KIFC1	Kinesin-like protein KIFC1	4.1	10	2REPA	2	1	0	1
CCNA2	Cyclin-A2	4	300	2BPMD	1	0	0	1
AURKA	Aurora kinase A	4	655	2J4ZB	2*	1	0	1
TK1	Thymidine kinase, cytosolic	4	222	2ORVB	1*	1	0	0
CBX2	Chromobox protein homolog 2	3.9	16	3H91A	1	0	1	0
KIF23	Kinesin-like protein KIF23	3.9	24	3VHXH	1	0	0	1
CENPM	Centromere protein M	3.9	0	4P0TA	1	0	0	1
CASC5	Protein CASC5	3.9	14	4NF9B	2	0	1	1
HCN2	Potassium/sodium hyperpolarization-activated cyclic nucleotide-gated channel 2	3.8	8	3OTFA	1	1	0	0
CDC25A	M-phase inducer phosphatase 1	3.7	533	1C25A	2	0	0	2
AIM2	Interferon-inducible protein AIM2	3.7	67	3RN5D	1	0	0	1
RAD51	DNA repair protein RAD51 homolog 1	3.7	1451	1N0WA	2	0	0	2
CENPE	Centromere-associated protein E	3.6	29	1T5CA	3	1	0	2
HIST1H2BM	Histone H2B type 1-M	3.6	1	3AV1D	1	0	1	0
CBS	Cystathionine beta-synthase	3.6	438	4UUUA;4COOB	4	0	0	4
KIF18A	Kinesin-like protein KIF18A	3.6	15	3LREB	4	1	0	3
TYMS	Thymidylate synthase	3.6	3396	1HW4A	2*	1	0	1
KIF11	Kinesin-like protein KIF11	3.5	139	4AP0A	3	1	0	2
EZH2	Histone-lysine N-methyltransferase EZH2	3.4	1168	4MI0A	2	0	0	2
PROC	Vitamin K-dependent protein C	3.3	28555	1AUTC	1*	1	0	0
GINS4	DNA replication complex GINS protein SLD5	3.3	3	2E9XH	2	0	1	1
ARHGAP11A	Rho GTPase-activating protein 11A	3.2	1	3EAPA	3	0	1	2
CCL17	C-C motif chemokine 17	3.2	149	1NR4D	1	0	0	1
ELAVL2	ELAV-like protein 2	3.2	24	1G2EA	1	0	0	1
IL21R	Interleukin-21 receptor	3.2	263	3TGXM	1	0	1	0
CCNB1	G2/mitotic-specific cyclin-B1	3.2	2154	2B9RB	1	0	0	1
HIST1H2BH	Histone H2B type 1-H	3.2	0	3AV1D	1	0	1	0
GSG2	Serine/threonine-protein kinase haspin	3.2	7	3DLZA	1*	1	1	0
HIST1H2BJ	Histone H2B type 1-J	3.1	1	3W99D	1	0	1	0
CKS2	Cyclin-dependent kinases regulatory subunit 2	3.1	51	1CKSC	1	0	0	1
MIOX	Inositol oxygenase	3.1	2	2IBNA	1	1	0	0
BLM	Bloom syndrome protein	3.1	1115	4CDGA	5	1	0	4
EME1	Crossover junction endonuclease EME1	3.1	42	4P0QB	1	0	0	1
MAD2L1	Mitotic spindle assembly checkpoint protein MAD2A	3.1	216	2V64F	1	0	1	0
HIST1H2BL	Histone H2B type 1-L	3	2	3AV1D	1	0	1	0
GZMB	Granzyme B	3	1487	1IAUA	1*	1	0	0
APLP1	Amyloid-like protein 1	3	19	3PMRA	1	0	0	1
CTSV	Cathepsin L2	3	8	3KFQB	1	1	1	0
2015-09-03	Neuronal-specific septin-3	2.9	1	3SOPA	2	1	1	1
CAPS	Calcyphosin	2.9	613	3E3RA	1	0	0	1
PACSIN1	Protein kinase C and casein kinase substrate in neurons protein 1	2.8	3	3HAHB	1	0	0	1
AOC1	Amiloride-sensitive amine oxidase [copper-containing]	2.8	0	3MPHA	7	1	2	4
F12	Coagulation factor XII	2.8	212	4BDXA	1	0	0	1
UCHL1	Ubiquitin carboxyl-terminal hydrolase isozyme L1	2.8	323	3IFWA	2	1	1	1
PSAT1	Phosphoserine aminotransferase	2.8	24	3E77C	2	1	0	1
KPNA2	Importin subunit alpha-1	2.8	47	4E4VB	1	0	0	1
ARHGAP11B	Rho GTPase-activating protein 11B	2.7	0	3EAPA	3	0	1	2
PLK4	Serine/threonine-protein kinase PLK4	2.7	101	3COKA	3*	1	0	2
CAMK1G	Calcium/calmodulin-dependent protein kinase type 1G	2.7	2	2JAMB	2*	1	0	1
GGH	Gamma-glutamyl hydrolase	2.6	244	1L9XA	2	1	0	1
CPA4	Carboxypeptidase A4	2.6	6	2BOAA	2	1	0	1
ADAM8	Disintegrin and metalloproteinase domain-containing protein 8	2.6	46	4DD8A	1*	1	0	0
ITPKA	Inositol-trisphosphate 3-kinase A	2.6	10	1W2FA	1	1	0	0
ATAD2	ATPase family AAA domain-containing protein 2	2.6	35	4QSPA	1*	0	1	0
CHEK1	Serine/threonine-protein kinase Chk1	2.6	75	2R0UA	1*	1	0	0
INHBA	Inhibin beta A chain	2.6	43	1S4YB	1	0	0	1
PYCR1	Pyrroline-5-carboxylate reductase 1, mitochondrial	2.5	7	2IZZA	1	1	0	0
FN1	Fibronectin	2.5	6799	3M7PA	3	0	0	3
IL2RA	Interleukin-2 receptor subunit alpha	2.5	987	2ERJE	1	0	1	0
CHI3L1	Chitinase-3-like protein 1	2.5	194	1HJVA	2	1	0	1
CLIC3	Chloride intracellular channel protein 3	2.5	10	3KJYB	1	0	0	1
IL11	Interleukin-11	2.4	407	4MHLA	2	0	0	2
FSCN1	Fascin	2.4	374	3P53B	2	0	0	2
HIST1H2BC	Histone H2B type 1-C/E/F/G/I	2.4	1	3AV1D	1	0	1	0
QPCT	Glutaminyl-peptide cyclotransferase	2.4	13	3SI0A	1	0	0	1
FEN1	Flap endonuclease 1	2.4	148	1UL1Y	3	0	1	2
GPSM2	G-protein-signaling modulator 2	2.4	10	3SF4A	3	0	3	0
GINS2	DNA replication complex GINS protein PSF2	2.4	10	2Q9QA	1	0	1	0
HK3	Hexokinase-3	2.4	57	3HM8C	5	1	0	4
RHEBL1	GTPase RhebL1	2.3	7	3OESA	2	1	0	1
HIST1H2BK	Histone H2B type 1-K	2.3	0	3AV1D	1	0	1	0
PLAUR	Urokinase plasminogen activator surface receptor	2.3	926	1YWHM	3	0	2	1
ZBTB32	Zinc finger and BTB domain-containing protein 32	2.3	3	3M5BB	1	0	1	0
SDS	L-serine dehydratase/L-threonine deaminase	2.2	4843	1P5JA	1	1	0	0
SH2B2	SH2B adapter protein 2	2.2	7	1Q2HA	1	0	1	0
ACBD7	Acyl-CoA-binding domain-containing protein 7	2.2	0	3EPYB	1	0	1	0
HIST1H2BN	Histone H2B type 1-N	2.2	1	3AV1D	1	0	1	0
RCC1	Regulator of chromosome condensation	2.2	56	1A12A	1	0	0	1
SERPINE2	Glia-derived nexin	2.2	68	4DY7C	2	0	0	2
BCAT1	Branched-chain-amino-acid aminotransferase, cytosolic	2.2	21	2COGA	3*	1	0	2
RNASE2	Non-secretory ribonuclease	2.2	6	1K2AA	1	1	1	0
SEMA7A	Semaphorin-7A	2.2	11	3NVQE	5	0	0	5
TYMP	Thymidine phosphorylase	2.1	1247	2WK5B	4*	1	0	3
DDX39A	ATP-dependent RNA helicase DDX39A	2.1	8	1XTIA	2	1	1	0
CDC25B	M-phase inducer phosphatase 2	2.1	250	1QB0A	2	0	0	2
TAP1	Antigen peptide transporter 1	2.1	413	1JJ7A	1	0	0	1
ACOT11	Acyl-coenzyme A thioesterase 11	2.1	1	3FO5A	1	1	0	0
PTPN7	Tyrosine-protein phosphatase non-receptor type 7	2.1	7	1ZC0A	2	0	0	2
IMPA2	Inositol monophosphatase 2	2	2	2CZKA	3	1	0	2
GAPDH	Glyceraldehyde-3-phosphate dehydrogenase	2	1206	1ZNQO	1	1	1	0
RASGRP1	RAS guanyl-releasing protein 1	2	54	4L9MA	6	0	0	6
UCK2	Uridine-cytidine kinase 2	2	17	1XRJA	1	1	0	0
PLA2G7	Platelet-activating factor acetylhydrolase	2	46	3F96A	2	1	0	1
HIST3H2BB	Histone H2B type 3-B	2	0	3W99D	1	0	1	0
PSPH	Phosphoserine phosphatase	2	43	1L8OA	1	1	0	0
COMTD1	Catechol O-methyltransferase domain-containing protein 1	2	0	2AVDB	3	1	0	2
EPCAM	Epithelial cell adhesion molecule	1.9	1518	4MZVA	3	0	0	3
SUV39H2	Histone-lysine N-methyltransferase SUV39H2	1.9	16	2R3AA	4	1	0	3
NME1	Nucleoside diphosphate kinase A	1.9	857	3L7UB	2	1	0	1
SPHK1	Sphingosine kinase 1	1.8	306	4L02B	1	1	0	0
STK26	Serine/threonine-protein kinase 26	1.8	0	3GGFB	2*	1	0	1
EPHB3	Ephrin type-B receptor 3	1.8	52	3ZFYA;3P1IC	3	0	1	2
IDH2	Isocitrate dehydrogenase [NADP], mitochondrial	1.8	429	4JA8B	4*	1	0	3
HS3ST3A1	Heparan sulfate glucosamine 3-O-sulfotransferase 3A1	1.8	2	1T8UB	1	1	0	0
TNFSF4	Tumor necrosis factor ligand superfamily member 4	1.8	113	2HEVF	1	0	0	1
MB21D1	Cyclic GMP-AMP synthase	1.8	9	4O68A	3	1	1	1
MIF	Macrophage migration inhibitory factor	1.8	631	3HOFC	1*	1	0	0
SCML2	Sex comb on midleg-like protein 2	1.8	5	2BIVB	1	0	0	1
MMP14	Matrix metalloproteinase-14	1.8	650	3MA2A	1	1	1	0
HPRT1	Hypoxanthine-guanine phosphoribosyltransferase	1.8	1145	4IJQD	1*	1	0	0
RIPK2	Receptor-interacting serine/threonine-protein kinase 2	1.7	34	4C8BB	1*	1	0	0
AGO2	Protein argonaute-2	1.7	156	4F3TA	5*	0	1	4
GBP1	Interferon-induced guanylate-binding protein 1	1.7	31	1F5NA	7	0	1	6
NUDT5	ADP-sugar pyrophosphatase	1.7	2	2DSBB	1	1	0	0
DIRAS1	GTP-binding protein Di-Ras1	1.7	3	2GF0A	1	1	0	0
ZWILCH	Protein zwilch homolog	1.7	8	3IF8B	2	0	0	2
ACOT7	Cytosolic acyl coenzyme A thioester hydrolase	1.7	1	2QQ2L	1	0	0	1
TPI1	Triosephosphate isomerase	1.7	99	2VOMD	2	1	1	0
UPP1	Uridine phosphorylase 1	1.7	11	3EUFA	3	1	1	1
NCF1	Neutrophil cytosol factor 1	1.7	11	1NG2A;1KQ6A	3	0	3	0
TSTA3	GDP-L-fucose synthase	1.7	8	4BL5A	1	1	0	0
DDIT4	DNA damage-inducible transcript 4 protein	1.7	77	3LQ9A	2	0	0	2
BAK1	Bcl-2 homologous antagonist/killer	1.7	538	2JCNA	1	0	0	1
DNMT1	DNA (cytosine-5)-methyltransferase 1	1.7	1057	3EPZB;3SWRA	10	1	0	9
SKP2	S-phase kinase-associated protein 2	1.7	715	2ASTB	2	0	1	1
CHEK2	Serine/threonine-protein kinase Chk2	1.7	938	3I6UA	3*	1	0	2
LIMK1	LIM domain kinase 1	1.6	108	3S95A	2*	1	0	1
XPO5	Exportin-5	1.6	42	3A6PA	7	0	1	6
NUDT1	7,8-dihydro-8-oxoguanine triphosphatase	1.6	18	3Q93A	1	1	0	0
ST14	Suppressor of tumorigenicity 14 protein	1.6	93	3NPSA	1*	1	0	0
LILRB1	Leukocyte immunoglobulin-like receptor subfamily B member 1	1.6	37	4LL9B;3D2UH	2	0	0	2
TFDP1	Transcription factor Dp-1	1.6	84	2AZEA	1	0	1	0
EPHB2	Ephrin type-B receptor 2	1.6	180	2QBXB;3ZFMA	3	1	1	1
MYO10	Unconventional myosin-X	1.6	18	3AU5B	7	0	0	7
PRIM2	DNA primase large subunit	1.6	2	4BPUD;3L9QA	6	0	0	6
PDIA4	Protein disulfide-isomerase A4	1.6	7	3IDVA	1	1	0	0
ADORA2A	Adenosine receptor A2a	1.6	10	3VG9A	5	0	1	4
DNPH1	2'-deoxynucleoside 5'-phosphate N-hydrolase 1	1.6	3	4P5EB	1	1	0	0
ITGAX	Integrin alpha-X	1.6	723	4NENA	7	0	0	7
DNMT3A	DNA (cytosine-5)-methyltransferase 3A	1.6	577	3LLRD;4U7TA	5	1	0	4
PDE7A	High affinity cAMP-specific 3',5'-cyclic phosphodiesterase 7A	1.6	7	4PM0A	1*	1	0	0
GMPS	GMP synthase [glutamine-hydrolyzing]	1.6	48	2VXOA	7	1	0	6
SHMT2	Serine hydroxymethyltransferase, mitochondrial	1.6	11	3OU5A	4	0	1	3
GMDS	GDP-mannose 4,6 dehydratase	1.6	16	1T2AA	1	1	0	0
GALE	UDP-glucose 4-epimerase	1.6	984	1EK6B	1	1	0	0
TFRC	Transferrin receptor protein 1	1.6	70	1DE4I	5	0	0	5
PIM2	Serine/threonine-protein kinase pim-2	1.6	94	2IWIA	3*	1	0	2
ITGB2	Integrin beta-2	1.6	573	4NENB	4	0	1	3
TBC1D7	TBC1 domain family member 7	1.5	4	3QWLA	1	0	0	1
RAD21	Double-strand-break repair protein rad21 homolog	1.5	98	4PK7B	1	0	0	1
PLAU	Urokinase-type plasminogen activator	1.5	3633	2VNTD	1*	1	0	0
GGCT	Gamma-glutamylcyclotransferase	1.5	27	3CRYB	1	1	0	0
RANBP1	Ran-specific GTPase-activating protein	1.5	21	1K5DE	1	0	1	0
MEMO1	Protein MEMO1	1.5	10	3BCZA	1	0	0	1
RAC3	Ras-related C3 botulinum toxin substrate 3	1.5	82	4GZLB	1	1	0	0
LCK	Tyrosine-protein kinase Lck	1.5	773	2PL0A	3*	1	0	2
XYLB	Xylulose kinase	1.5	0	4BC3A	2*	1	0	1
MVD	Diphosphomevalonate decarboxylase	1.5	2571	3D4JA	1	1	0	0

## Sheet: UCEC
Protein		Cancer		Structure
Symbol	Name	FC	Cancer Publications	PDB	All	ENZ	PPI	OTH
MAGEA4	Melanoma-associated antigen 4	8.3	142	2WA0A	1	0	0	1
RHCG	Ammonium transporter Rh type C	7.6	10	3HD6A	5	0	3	2
AKR1B10	Aldo-keto reductase family 1 member B10	7.5	115	4JIIX	1*	1	0	0
CYP2B6	Cytochrome P450 2B6	6.7	203	3QOAA	4	0	0	4
AOC1	Amiloride-sensitive amine oxidase [copper-containing]	6.4	0	3MPHA	7	1	2	4
CA6	Carbonic anhydrase 6	6.2	10	3FE4A	1	1	0	0
FABP7	Fatty acid-binding protein, brain	5.8	123	1FE3A	1	0	0	1
MIOX	Inositol oxygenase	5.7	2	2IBNA	1	1	0	0
CALML3	Calmodulin-like protein 3	5.6	5	1GGZA	2	0	0	2
BMP5	Bone morphogenetic protein 5	5.6	17	2R53A	1	0	0	1
PF4V1	Platelet factor 4 variant	5.5	9	4HSVD	1	0	0	1
DDC	Aromatic-L-amino-acid decarboxylase	5.5	325	3RBFA	4	1	1	2
CA9	Carbonic anhydrase 9	5.4	872	3IAIC	3	1	0	2
CRYBA4	Beta-crystallin A4	5.4	2	3LWKA	1	0	0	1
EPHA8	Ephrin type-A receptor 8	5.4	14	3KULB	3	1	0	2
PGLYRP3	Peptidoglycan recognition protein 3	5.3	1	2APHA	1	0	0	1
CHAT	Choline O-acetyltransferase	5.2	353	2FY4A	6	1	0	5
BPIFA1	BPI fold-containing family A member 1	5.2	38	4KGHB	2	0	0	2
CAPN13	Calpain-13	5.1	0	2I7AA	3	0	0	3
SERPINB4	Serpin B4	5	7	2ZV6A	4	0	0	4
ROS1	Proto-oncogene tyrosine-protein kinase ROS	5	256	3ZBFA	1*	1	0	0
MYH7	Myosin-7	4.9	19	4DB1A	3	1	0	2
RBP2	Retinol-binding protein 2	4.8	40	2RCTA	1	0	0	1
GH2	Growth hormone variant	4.8	24	1A22A	1	0	0	1
DPYSL5	Dihydropyrimidinase-related protein 5	4.7	43	4B90B	2	0	0	2
RLBP1	Retinaldehyde-binding protein 1	4.7	0	4CJ6A	4	0	0	4
PKP1	Plakophilin-1	4.7	46	1XM9A	1	0	0	1
CYP2C19	Cytochrome P450 2C19	4.5	281	4GQSD	8*	0	0	8
AMBP	Protein AMBP	4.4	15	4ES7A	1	0	0	1
CPN1	Carboxypeptidase N catalytic chain	4.4	0	2NSMA	2	0	0	2
CTSV	Cathepsin L2	4.4	8	3KFQB	1	1	1	0
MYH6	Myosin-6	4.4	9	4DB1A	3	1	0	2
CCNE1	G1/S-specific cyclin-E1	4.3	266	1W98B	2	0	1	1
MMP12	Macrophage metalloelastase	4.2	110	3BA0A	3	0	0	3
CDC20	Cell division cycle protein 20 homolog	4.2	291	4GGDB	2*	0	0	2
SERPINB5	Serpin B5	4.2	425	1XU8A	3	0	0	3
RAB26	Ras-related protein Rab-26	4.2	3	2G6BA	2	1	0	1
AKR1C2	Aldo-keto reductase family 1 member C2	4.2	100	4JQ4B	1	1	0	0
BIRC5	Baculoviral IAP repeat-containing protein 5	4.1	3230	3UEHA	1	0	0	1
LTF	Lactotransferrin	4.1	77	2BJJX	8	0	0	8
S100A5	Protein S100-A5	4	13	4DIRB	2	1	0	1
IYD	Iodotyrosine dehalogenase 1	4	4	4TTCF	2	1	0	1
SULT2B1	Sulfotransferase family cytosolic 2B member 1	3.9	20	1Q1QA	4	1	0	3
BUB1	Mitotic checkpoint serine/threonine-protein kinase BUB1	3.9	378	4R8QA	4	1	0	3
XDH	Xanthine dehydrogenase/oxidase	3.9	34	2E1QD	10	1	0	9
HIST1H2BO	Histone H2B type 1-O	3.9	1	3AV1D	1	0	1	0
NEK2	Serine/threonine-protein kinase Nek2	3.9	113	2XK4A	3*	1	0	2
MMP9	Matrix metalloproteinase-9	3.9	6042	1ITVA;1L6JA	6	1	0	5
MELK	Maternal embryonic leucine zipper kinase	3.9	61	4UMUA	4*	1	0	3
CDC25C	M-phase inducer phosphatase 3	3.9	630	3OP3A	1	0	0	1
KIF2C	Kinesin-like protein KIF2C	3.8	41	2HEHA	2	1	0	1
MIA	Melanoma-derived growth regulatory protein	3.8	1144	1I1JA	1	0	0	1
2015-09-03	Neuronal-specific septin-3	3.8	1	3SOPA	2	1	1	1
PKMYT1	Membrane-associated tyrosine- and threonine-specific cdc2-inhibitory kinase	3.8	13	3P1AA	2	1	0	1
GAD1	Glutamate decarboxylase 1	3.8	27	3VP6B	3	1	1	1
CA2	Carbonic anhydrase 2	3.8	6931	3M5TA	1	1	0	0
F12	Coagulation factor XII	3.7	212	4BDXA	1	0	0	1
CRYBB1	Beta-crystallin B1	3.7	1	1OKIA	1	0	0	1
AURKB	Aurora kinase B	3.7	482	4AF3A	2*	1	0	1
TTK	Dual specificity protein kinase TTK	3.7	143	2ZMDA	1*	1	0	0
TNNC1	Troponin C, slow skeletal and cardiac muscles	3.6	5	1J1DA	1	0	1	0
PLK1	Serine/threonine-protein kinase PLK1	3.6	743	1Q4KB;2OWBA	4*	1	1	2
ALK	ALK tyrosine kinase receptor	3.6	2868	4MKCA	2*	1	0	1
CKMT1A	Creatine kinase U-type, mitochondrial	3.6	1	1QK1G	1	1	0	0
PCSK9	Proprotein convertase subtilisin/kexin type 9	3.6	34	2P4EA	5	1	2	3
EXO1	Exonuclease 1	3.6	171	3QEBZ	3	0	0	3
DNMT3L	DNA (cytosine-5)-methyltransferase 3-like	3.5	45	2QRVF	3	0	0	3
RRM2	Ribonucleoside-diphosphate reductase subunit M2	3.5	142	2UW2A	2	0	0	2
AURKA	Aurora kinase A	3.5	655	2J4ZB	2*	1	0	1
CTSE	Cathepsin E	3.5	70	1TZSA	2	1	1	0
ANPEP	Aminopeptidase N	3.5	273	4FYQA	4	1	1	3
NQO1	NAD(P)H dehydrogenase [quinone] 1	3.4	989	4CF6A	1	0	1	0
PKLR	Pyruvate kinase PKLR	3.4	9	4IMAA	6	1	2	4
KIFC1	Kinesin-like protein KIFC1	3.4	10	2REPA	2	1	0	1
AQP5	Aquaporin-5	3.4	68	3D9SD	2	0	0	2
TK1	Thymidine kinase, cytosolic	3.4	222	2ORVB	1*	1	0	0
AQP2	Aquaporin-2	3.4	29	4NEFA	2	0	0	2
TPH1	Tryptophan 5-hydroxylase 1	3.4	18	1MLWA	2*	1	0	1
CYP1A1	Cytochrome P450 1A1	3.3	2601	4I8VD	4	0	0	4
GFRA3	GDNF family receptor alpha-3	3.3	11	2GH0B	1	0	0	1
KIF18A	Kinesin-like protein KIF18A	3.3	15	3LREB	4	1	0	3
TOP2A	DNA topoisomerase 2-alpha	3.3	355	4R1FA;4FM9A	8	2	0	6
LCN2	Neutrophil gelatinase-associated lipocalin	3.2	334	3HWGA	1	0	0	1
CASC5	Protein CASC5	3.2	14	4NF9B	2	0	1	1
UHRF1	E3 ubiquitin-protein ligase UHRF1	3.2	112	4GY5B;2PB7A	2	1	0	1
PROC	Vitamin K-dependent protein C	3.2	28555	1AUTC	1*	1	0	0
HIST1H2BH	Histone H2B type 1-H	3.2	0	3AV1D	1	0	1	0
GSG2	Serine/threonine-protein kinase haspin	3.2	7	3DLZA	1*	1	1	0
HMGCS2	Hydroxymethylglutaryl-CoA synthase, mitochondrial	3.2	9	2WYAA	4	1	1	2
RAC3	Ras-related C3 botulinum toxin substrate 3	3.2	82	4GZLB	1	1	0	0
PRSS8	Prostasin	3.1	56	3E0NB	1*	1	0	0
AKR1C1	Aldo-keto reductase family 1 member C1	3.1	96	4JQ4B	1	1	0	0
KIF15	Kinesin-like protein KIF15	3.1	9	4BN2C	4	1	0	3
CCNB1	G2/mitotic-specific cyclin-B1	3.1	2154	2B9RB	1	0	0	1
GDA	Guanine deaminase	3.1	387	2UZ9A	2	1	0	1
RAD51	DNA repair protein RAD51 homolog 1	3	1451	1N0WA	2	0	0	2
HIST1H2BJ	Histone H2B type 1-J	3	1	3W99D	1	0	1	0
HS3ST5	Heparan sulfate glucosamine 3-O-sulfotransferase 5	3	0	3BD9A	1	1	0	0
CPA4	Carboxypeptidase A4	3	6	2BOAA	2	1	0	1
KIF11	Kinesin-like protein KIF11	3	139	4AP0A	3	1	0	2
CDC25A	M-phase inducer phosphatase 1	2.9	533	1C25A	2	0	0	2
HIST1H2BL	Histone H2B type 1-L	2.9	2	3AV1D	1	0	1	0
FAM83A	Protein FAM83A	2.9	10	4URJD	1	0	0	1
EME1	Crossover junction endonuclease EME1	2.9	42	4P0QB	1	0	0	1
HIST1H2BC	Histone H2B type 1-C/E/F/G/I	2.9	1	3AV1D	1	0	1	0
GGH	Gamma-glutamyl hydrolase	2.9	244	1L9XA	2	1	0	1
HGD	Homogentisate 1,2-dioxygenase	2.9	536	1EY2A	4	1	0	3
UCHL1	Ubiquitin carboxyl-terminal hydrolase isozyme L1	2.8	323	3IFWA	2	1	1	1
MMP13	Collagenase 3	2.8	317	4FVLA	2	0	1	1
CCNA2	Cyclin-A2	2.8	300	2BPMD	1	0	0	1
USH1C	Harmonin	2.8	7	3K1RA	1	0	0	1
CBLC	E3 ubiquitin-protein ligase CBL-C	2.8	18	3VRQA	1	0	0	1
CBX2	Chromobox protein homolog 2	2.8	16	3H91A	1	0	1	0
TPH2	Tryptophan 5-hydroxylase 2	2.8	11	4V06A	2	1	1	0
ACBD7	Acyl-CoA-binding domain-containing protein 7	2.8	0	3EPYB	1	0	1	0
ARHGAP11B	Rho GTPase-activating protein 11B	2.8	0	3EAPA	3	0	1	2
BLM	Bloom syndrome protein	2.7	1115	4CDGA	5	1	0	4
ANK1	Ankyrin-1	2.7	23	3UD2C;1N11A	3	0	1	2
CENPE	Centromere-associated protein E	2.7	29	1T5CA	3	1	0	2
CD1A	T-cell surface glycoprotein CD1a	2.7	887	1ONQA	2	0	0	2
CENPM	Centromere protein M	2.7	0	4P0TA	1	0	0	1
GDF5	Growth/differentiation factor 5	2.7	18	2BHKA	1	0	1	0
ARHGAP11A	Rho GTPase-activating protein 11A	2.7	1	3EAPA	3	0	1	2
KPNA2	Importin subunit alpha-1	2.7	47	4E4VB	1	0	0	1
CKS2	Cyclin-dependent kinases regulatory subunit 2	2.6	51	1CKSC	1	0	0	1
UBE2U	Ubiquitin-conjugating enzyme E2 U	2.6	0	1YRVA	1	0	0	1
MAD2L1	Mitotic spindle assembly checkpoint protein MAD2A	2.6	216	2V64F	1	0	1	0
PSAT1	Phosphoserine aminotransferase	2.6	24	3E77C	2	1	0	1
AIM2	Interferon-inducible protein AIM2	2.6	67	3RN5D	1	0	0	1
EZH2	Histone-lysine N-methyltransferase EZH2	2.6	1168	4MI0A	2	0	0	2
IFNG	Interferon gamma	2.6	14526	3BESL	1	0	0	1
PACSIN1	Protein kinase C and casein kinase substrate in neurons protein 1	2.6	3	3HAHB	1	0	0	1
CAPN8	Calpain-8	2.6	2	2NQAB	2*	1	0	1
GGTLC1	Gamma-glutamyltransferase light chain 1	2.6	0	4GDXB	2	0	2	0
SDS	L-serine dehydratase/L-threonine deaminase	2.6	4843	1P5JA	1	1	0	0
MAP2K6	Dual specificity mitogen-activated protein kinase kinase 6	2.6	82	3VN9A	2*	1	0	1
CYP2D6	Cytochrome P450 2D6	2.6	900	3QM4A	5*	0	0	5
GINS2	DNA replication complex GINS protein PSF2	2.6	10	2Q9QA	1	0	1	0
CTLA4	Cytotoxic T-lymphocyte protein 4	2.5	1523	2X44D	1	0	0	1
ALDH3A1	Aldehyde dehydrogenase, dimeric NADP-preferring	2.5	66	3SZAB	4*	1	0	3
GRB14	Growth factor receptor-bound protein 14	2.5	30	4K81G	6	0	1	5
SERPINA3	Alpha-1-antichymotrypsin	2.5	795	3DLWA	2	0	0	2
TYMS	Thymidylate synthase	2.4	3396	1HW4A	2*	1	0	1
CAPN9	Calpain-9	2.4	9	1ZIVA	1	0	0	1
DSP	Desmoplakin	2.4	320	1LM7A;3R6NA	2	0	0	2
EPCAM	Epithelial cell adhesion molecule	2.4	1518	4MZVA	3	0	0	3
ST14	Suppressor of tumorigenicity 14 protein	2.4	93	3NPSA	1*	1	0	0
CP	Ceruloplasmin	2.4	7859	2J5WA	9	0	0	9
PLA2G10	Group 10 secretory phospholipase A2	2.4	5	4UY1A	1*	1	0	0
KIF23	Kinesin-like protein KIF23	2.4	24	3VHXH	1	0	0	1
GINS4	DNA replication complex GINS protein SLD5	2.4	3	2E9XH	2	0	1	1
TTPA	Alpha-tocopherol transfer protein	2.4	2676	1OIZB	1	0	0	1
TNF	Tumor necrosis factor	2.4	29697	2ZPXA	2	0	1	1
CNDP1	Beta-Ala-His dipeptidase	2.3	6	3DLJA	2	0	1	1
HK3	Hexokinase-3	2.3	57	3HM8C	5	1	0	4
ITGB6	Integrin beta-6	2.3	12	4UM9D	4	0	0	4
HK2	Hexokinase-2	2.3	367	2NZTB	6	1	1	4
GGT1	Gamma-glutamyltranspeptidase 1	2.3	17	4GDXA;4GDXB	6	0	6	0
CFB	Complement factor B	2.3	94	2OK5A	8	1	0	7
FEN1	Flap endonuclease 1	2.3	148	1UL1Y	3	0	1	2
PLK4	Serine/threonine-protein kinase PLK4	2.3	101	3COKA	3*	1	0	2
PTPRN	Receptor-type tyrosine-protein phosphatase-like N	2.3	20	2I1YB	2	0	0	2
PYCR1	Pyrroline-5-carboxylate reductase 1, mitochondrial	2.3	7	2IZZA	1	1	0	0
TP63	Tumor protein 63	2.2	802	3QYNB;4A9ZD	2	0	1	1
TGM3	Protein-glutamine gamma-glutamyltransferase E	2.2	23	1NUDB	6	1	0	5
IDO1	Indoleamine 2,3-dioxygenase 1	2.2	96	4PK5A	3	1	0	2
ULBP3	NKG2D ligand 3	2.2	47	1KCGC	1	0	0	1
TBC1D7	TBC1 domain family member 7	2.2	4	3QWLA	1	0	0	1
HNF4G	Hepatocyte nuclear factor 4-gamma	2.2	13	1LV2A	3	0	0	3
HCN4	Potassium/sodium hyperpolarization-activated cyclic nucleotide-gated channel 4	2.2	2	3OTFA	1	1	0	0
MAPK13	Mitogen-activated protein kinase 13	2.2	26	4EYJA	1*	1	0	0
RAB25	Ras-related protein Rab-25	2.2	68	2OILA	1	1	0	0
LGR5	Leucine-rich repeat-containing G-protein coupled receptor 5	2.2	304	4KNGB	4	0	0	4
APLP1	Amyloid-like protein 1	2.1	19	3PMRA	1	0	0	1
MST1R	Macrophage-stimulating protein receptor	2.1	29	4QT8B;3PLSA	6	1	0	5
COMTD1	Catechol O-methyltransferase domain-containing protein 1	2.1	0	2AVDB	3	1	0	2
MAP3K9	Mitogen-activated protein kinase kinase kinase 9	2.1	12	3DTCA	2*	1	0	1
PNP	Purine nucleoside phosphorylase	2.1	798	4ECED	2*	1	1	1
OAS1	2'-5'-oligoadenylate synthase 1	2	35	4IG8A	2	1	0	1
RAP1GAP	Rap1 GTPase-activating protein 1	2	55	1SRQA	1	0	1	0
DPP3	Dipeptidyl peptidase 3	2	2	3FVYA	6	1	0	5
HCN2	Potassium/sodium hyperpolarization-activated cyclic nucleotide-gated channel 2	2	8	3OTFA	1	1	0	0
TBX4	T-box transcription factor TBX4	2	9	2X6VB	1	0	1	0
HIST1H2BD	Histone H2B type 1-D	2	1	3AV1D	1	0	1	0
ESRRG	Estrogen-related receptor gamma	2	60	2P7ZA	2*	0	1	1
IL21R	Interleukin-21 receptor	2	263	3TGXM	1	0	1	0
AK4	Adenylate kinase 4, mitochondrial	2	5	2BBWB	1	1	0	0
SEC14L4	SEC14-like protein 4	2	0	4TLGA	7	0	0	7
CD38	ADP-ribosyl cyclase/cyclic ADP-ribose hydrolase 1	2	2261	3DZKA	2	1	0	1
ERBB2	Receptor tyrosine-protein kinase erbB-2	1.9	19609	3MZWA;3PP0B	3*	1	0	2
ISG20	Interferon-stimulated gene 20 kDa protein	1.9	11	1WLJA	1	1	0	0
IDH2	Isocitrate dehydrogenase [NADP], mitochondrial	1.9	429	4JA8B	4*	1	0	3
CHI3L1	Chitinase-3-like protein 1	1.9	194	1HJVA	2	1	0	1
SERPINA1	Alpha-1-antitrypsin	1.9	1973	3NE4A	3	0	0	3
ERO1L	ERO1-like protein alpha	1.9	11	3AHQA	5	1	0	4
CDH1	Cadherin-1	1.9	1451	2O72A	1	0	0	1
RCC1	Regulator of chromosome condensation	1.9	56	1A12A	1	0	0	1
GALE	UDP-glucose 4-epimerase	1.9	984	1EK6B	1	1	0	0
STXBP2	Syntaxin-binding protein 2	1.9	13	4CCAA	5	0	1	4
CEL	Bile salt-activated lipase	1.9	310	1F6WA	4	1	0	3
MX1	Interferon-induced GTP-binding protein Mx1	1.9	133	3LJBB;4P4UA	4	1	0	3
TSTA3	GDP-L-fucose synthase	1.9	8	4BL5A	1	1	0	0
IL23A	Interleukin-23 subunit alpha	1.9	39	4OE8B	1	0	1	0
HIST2H2BE	Histone H2B type 2-E	1.9	1	3W99D	1	0	1	0
PGD	6-phosphogluconate dehydrogenase, decarboxylating	1.9	230	2JKVD	2	1	2	0
TFRC	Transferrin receptor protein 1	1.9	70	1DE4I	5	0	0	5
GAPDH	Glyceraldehyde-3-phosphate dehydrogenase	1.9	1206	1ZNQO	1	1	1	0
CLIC3	Chloride intracellular channel protein 3	1.9	10	3KJYB	1	0	0	1
CHEK1	Serine/threonine-protein kinase Chk1	1.9	75	2R0UA	1*	1	0	0
UCK2	Uridine-cytidine kinase 2	1.9	17	1XRJA	1	1	0	0
RAB27B	Ras-related protein Rab-27B	1.9	22	2F7SB	1	0	0	1
RNASE2	Non-secretory ribonuclease	1.8	6	1K2AA	1	1	1	0
TJP3	Tight junction protein ZO-3	1.8	5	3KFVA	3	0	0	3
HIST3H2BB	Histone H2B type 3-B	1.8	0	3W99D	1	0	1	0
ATAD2	ATPase family AAA domain-containing protein 2	1.8	35	4QSPA	1*	0	1	0
CBS	Cystathionine beta-synthase	1.8	438	4UUUA;4COOB	4	0	0	4
FOLH1	Glutamate carboxypeptidase 2	1.8	26	4MCQA	4*	1	0	3
ERBB3	Receptor tyrosine-protein kinase erbB-3	1.8	819	1M6BA;3LMGA	3*	1	0	2
HIST1H2BN	Histone H2B type 1-N	1.8	1	3AV1D	1	0	1	0
GMIP	GEM-interacting protein	1.8	4	3QWEA	2	0	0	2
TPI1	Triosephosphate isomerase	1.8	99	2VOMD	2	1	1	0
FASN	Fatty acid synthase	1.8	319	3HHDB;4W82B;2PX6A	9	1	0	8
TYMP	Thymidine phosphorylase	1.8	1247	2WK5B	4*	1	0	3
ADAM8	Disintegrin and metalloproteinase domain-containing protein 8	1.8	46	4DD8A	1*	1	0	0
ACE2	Angiotensin-converting enzyme 2	1.8	45	1R42A	3	1	0	2
NME1	Nucleoside diphosphate kinase A	1.8	857	3L7UB	2	1	0	1
IDH1	Isocitrate dehydrogenase [NADP] cytoplasmic	1.8	1075	4UMYA	4	1	0	3
DTYMK	Thymidylate kinase	1.7	58	2XX3A	1	1	0	0
HSPA6	Heat shock 70 kDa protein 6	1.7	13	3FE1B	1	1	0	0
NUDT5	ADP-sugar pyrophosphatase	1.7	2	2DSBB	1	1	0	0
MYO10	Unconventional myosin-X	1.7	18	3AU5B	7	0	0	7
ACOT4	Acyl-coenzyme A thioesterase 4	1.7	3	3K2IB	5	0	0	5
PPIF	Peptidyl-prolyl cis-trans isomerase F, mitochondrial	1.7	3	3RDCA	1*	1	0	0
PAX8	Paired box protein Pax-8	1.7	457	1K78A	1	0	0	1
VAV1	Proto-oncogene vav	1.7	208	3KY9A	5	0	2	3
HIST2H2BF	Histone H2B type 2-F	1.7	1	3AV1D	1	0	1	0
HGFAC	Hepatocyte growth factor activator	1.7	103	1YBWA	1	0	0	1
KIF22	Kinesin-like protein KIF22	1.7	9	3BFNA	4	1	0	3
GMDS	GDP-mannose 4,6 dehydratase	1.7	16	1T2AA	1	1	0	0
PKM	Pyruvate kinase PKM	1.7	52	1T5AD	5	1	1	3
ERBB4	Receptor tyrosine-protein kinase erbB-4	1.7	716	3BBTB;2AHXA	5*	1	0	4
TALDO1	Transaldolase	1.7	25	1F05A	1	1	0	0
CAMK2B	Calcium/calmodulin-dependent protein kinase type II subunit beta	1.7	4	2UX0E;2V7OA	4*	1	0	3
GPT2	Alanine aminotransferase 2	1.7	3	3IHJA	5	1	0	4
IL10	Interleukin-10	1.7	3290	2H24A	2	0	2	0
FGFR4	Fibroblast growth factor receptor 4	1.6	258	4QQ5A	2*	1	0	1
TDO2	Tryptophan 2,3-dioxygenase	1.6	51	4PW8F	2	1	1	1
BCAT1	Branched-chain-amino-acid aminotransferase, cytosolic	1.6	21	2COGA	3*	1	0	2
CAPG	Macrophage-capping protein	1.6	50	1JHWA	2	0	0	2
GPD1	Glycerol-3-phosphate dehydrogenase [NAD(+)], cytoplasmic	1.6	7	1X0VA	2	1	0	1
GGCT	Gamma-glutamylcyclotransferase	1.6	27	3CRYB	1	1	0	0
EZR	Ezrin	1.6	803	1NI2A	4	0	0	4
RFXANK	DNA-binding protein RFXANK	1.6	10	4QQMA	1	0	1	0
IL2RA	Interleukin-2 receptor subunit alpha	1.6	987	2ERJE	1	0	1	0
DDX39A	ATP-dependent RNA helicase DDX39A	1.6	8	1XTIA	2	1	1	0
EIF2AK2	Interferon-induced, double-stranded RNA-activated protein kinase	1.6	8	3UIUB	2	1	0	1
FABP5	Fatty acid-binding protein, epidermal	1.6	83	4LKPA	1	0	0	1
RPS6KA1	Ribosomal protein S6 kinase alpha-1	1.6	70	3RNYA;2Z7RA	4	1	0	3
PDIA4	Protein disulfide-isomerase A4	1.6	7	3IDVA	1	1	0	0
BAK1	Bcl-2 homologous antagonist/killer	1.6	538	2JCNA	1	0	0	1
MANF	Mesencephalic astrocyte-derived neurotrophic factor	1.6	9	2W51A	1	0	0	1
GPI	Glucose-6-phosphate isomerase	1.6	3439	1JIQA	2	1	1	0
SDSL	Serine dehydratase-like	1.6	2	2RKBA	1	1	0	0
IFIT1	Interferon-induced protein with tetratricopeptide repeats 1	1.6	27	4HOUA	3	0	0	3
PANK1	Pantothenate kinase 1	1.6	2	3SMPB	4	1	0	3
DBI	Acyl-CoA-binding protein	1.6	52	2CB8A	1	0	0	1
NUDT1	7,8-dihydro-8-oxoguanine triphosphatase	1.6	18	3Q93A	1	1	0	0
ADAP1	Arf-GAP with dual PH domain-containing protein 1	1.6	4	3MDBC	2	0	0	2
STAT1	Signal transducer and activator of transcription 1-alpha/beta	1.6	1737	1YVLA	4	0	0	4
MIF	Macrophage migration inhibitory factor	1.6	631	3HOFC	1*	1	0	0
HMGCR	3-hydroxy-3-methylglutaryl-coenzyme A reductase	1.6	324	1HWJD	1	1	0	0
CSF3R	Granulocyte colony-stimulating factor receptor	1.6	1753	2D9QB	1	0	0	1
CHEK2	Serine/threonine-protein kinase Chk2	1.6	938	3I6UA	3*	1	0	2
PDK3	[Pyruvate dehydrogenase (acetyl-transferring)] kinase isozyme 3, mitochondrial	1.5	6	1Y8PA	3	1	1	1
DENND1B	DENN domain-containing protein 1B	1.5	2	3TW8A	3	0	0	3
SHMT2	Serine hydroxymethyltransferase, mitochondrial	1.5	11	3OU5A	4	0	1	3
PDF	Peptide deformylase, mitochondrial	1.5	308	3G5PA	3	1	0	2
HIST1H2BK	Histone H2B type 1-K	1.5	0	3AV1D	1	0	1	0
LILRB2	Leukocyte immunoglobulin-like receptor subfamily B member 2	1.5	28	4LLAB;2GW5A	2	0	0	2
B4GALT1	Beta-1,4-galactosyltransferase 1	1.5	14	2AGDC	1	1	0	0
HMBS	Porphobilinogen deaminase	1.5	120	3ECRA	4	1	0	3
AIFM1	Apoptosis-inducing factor 1, mitochondrial	1.5	163	4FDCB	1	1	0	0
SULT1A2	Sulfotransferase 1A2	1.5	27	3U3RA	1	1	0	0
LILRB1	Leukocyte immunoglobulin-like receptor subfamily B member 1	1.5	37	4LL9B;3D2UH	2	0	0	2
LDHA	L-lactate dehydrogenase A chain	1.5	121	4L4RH	2*	1	1	0
DCXR	L-xylulose reductase	1.5	4	1WNTC	1	1	0	0
TKT	Transketolase	1.5	177	4KXUA	4	0	0	4
