# Supplementary material for: Small-molecule binding sites to explore protein–protein interactions in the cancer proteome
Source: Royal Society of Chemistry journal article supplement (doi:10.1039/c6mb00231e), 2016-07-05
Supplement: c6mb00231e2.xlsx [file c6mb00231e2.xlsx]

## Sheet: BRCA
Protein		Cancer		Structure
Symbol	Name	FC	HR (95% CI)	PDB	All	ENZ	PPI	OTH
MELK	Maternal embryonic leucine zipper kinase	3.9	1.6 (1.0 - 2.3)	4UMUA	4*	1	0	3
EXO1	Exonuclease 1	3.7	1.6 (1.1 - 2.4)	3QEBZ	3	0	0	3
BIRC5	Baculoviral IAP repeat-containing protein 5	3.7	1.6 (1.1 - 2.4)	3UEHA	1	0	0	1
PLK1	Serine/threonine-protein kinase PLK1	3.7	1.8 (1.2 - 2.7)	1Q4KB;2OWBA	4*	1	1	2
KIF2C	Kinesin-like protein KIF2C	3.6	1.5 (1.0 - 2.3)	2HEHA	2	1	0	1
BUB1	Mitotic checkpoint serine/threonine-protein kinase BUB1	3.6	1.6 (1.1 - 2.4)	4R8QA	4	1	0	3
AURKA	Aurora kinase A	3.2	1.6 (1.1 - 2.3)	2J4ZB	2*	1	0	1
TTK	Dual specificity protein kinase TTK	3.1	1.5 (1.0 - 2.3)	2ZMDA	1*	1	0	0
CCNE1	G1/S-specific cyclin-E1	3	2.1 (1.4 - 3.2)	1W98B	2	0	1	1
CASC5	Protein CASC5	3	1.7 (1.1 - 2.5)	4NF9B	2	0	1	1
APLP1	Amyloid-like protein 1	2.9	1.5 (1.0 - 2.2)	3PMRA	1	0	0	1
RAD51	DNA repair protein RAD51 homolog 1	2.8	1.6 (1.1 - 2.4)	1N0WA	2	0	0	2
CBX2	Chromobox protein homolog 2	2.8	1.7 (1.2 - 2.6)	3H91A	1	0	1	0
CCNB1	G2/mitotic-specific cyclin-B1	2.6	1.6 (1.1 - 2.3)	2B9RB	1	0	0	1
ARHGAP11A	Rho GTPase-activating protein 11A	2.3	1.5 (1.0 - 2.2)	3EAPA	3	0	0	3
KPNA2	Importin subunit alpha-1	2.2	1.8 (1.2 - 2.7)	4E4VB	1	0	0	1
GSG2	Serine/threonine-protein kinase haspin	2	1.6 (1.1 - 2.4)	3DLZA	1*	1	1	0
PIWIL1	Piwi-like protein 1	1.6	1.7 (1.1 - 2.5)	3O3IX	1	0	0	1
QPRT	Nicotinate-nucleotide pyrophosphorylase [carboxylating]	1.6	1.9 (1.3 - 2.9)	3LARE	1	1	0	0
CHEK1	Serine/threonine-protein kinase Chk1	1.5	1.5 (1.0 - 2.2)	2R0UA	1*	1	0	0
CPA4	Carboxypeptidase A4	1.5	1.5 (1.0 - 2.3)	2BOAA	2	1	0	1

## Sheet: COAD
Protein		Cancer		Structure
Symbol	Name	FC	HR (95% CI)	PDB	All	ENZ	PPI	OTH
AQP2	Aquaporin-2	3.4	1.9 (1.0 - 3.6)	4NEFA	2	0	0	2
SNAI1	Zinc finger protein SNAI1	1.8	1.9 (1.0 - 3.6)	3W5KB	2	0	0	2
FSCN1	Fascin	1.6	2.1 (1.1 - 3.9)	3P53B	2	0	0	2
CYP19A1	Aromatase	1.5	2.1 (1.1 - 4.0)	3EQMA	3	0	0	3

## Sheet: GBM
Protein		Cancer		Structure
Symbol	Name	FC	HR (95% CI)	PDB	All	ENZ	PPI	OTH
CA9	Carbonic anhydrase 9	6.5	1.6 (1.1 - 2.4)	3IAIC	3	1	0	2
FCGR2B	Low affinity immunoglobulin gamma Fc region receptor II-b	5	1.7 (1.1 - 2.5)	3WJLC	1	0	0	1
CHI3L2	Chitinase-3-like protein 2	4.8	1.9 (1.3 - 2.9)	4P8XA	2	0	0	2
STEAP3	Metalloreductase STEAP3	4	1.5 (1.0 - 2.3)	2VNSB	1	1	0	0
FCGR2C	Low affinity immunoglobulin gamma Fc region receptor II-c	3.7	1.5 (1.0 - 2.2)	3WJLC	1	0	0	1
SERPINA5	Plasma serine protease inhibitor	3.6	1.6 (1.1 - 2.4)	2OL2A	3	0	0	3
C1R	Complement C1r subcomponent	3.1	1.6 (1.0 - 2.3)	1GPZB	3	1	0	2
LILRB2	Leukocyte immunoglobulin-like receptor subfamily B member 2	2.9	1.5 (1.0 - 2.3)	4LLAB;2GW5A	2	0	0	2
FBP1	Fructose-1,6-bisphosphatase 1	2.6	1.5 (1.0 - 2.3)	2FHYA	2	0	0	2
NCF1C	Putative neutrophil cytosol factor 1C	2.5	1.8 (1.2 - 2.7)	1NG2A;1KQ6A	3	0	3	0
IGFBP4	Insulin-like growth factor-binding protein 4	2.5	1.5 (1.0 - 2.2)	2DSRG	1	0	1	0
RNASE4	Ribonuclease 4	2.4	1.5 (1.0 - 2.3)	2RNFA	1	1	0	0
ITGB2	Integrin beta-2	1.8	1.6 (1.1 - 2.3)	4NENB	4	0	1	3
TXNIP	Thioredoxin-interacting protein	1.8	1.7 (1.1 - 2.6)	4LL4A	3	0	0	3
CRYZ	Quinone oxidoreductase	1.6	1.5 (1.0 - 2.3)	1YB5B	1	1	0	0
DDB2	DNA damage-binding protein 2	1.6	1.5 (1.0 - 2.2)	4E54B	3	0	0	3
DUSP6	Dual specificity protein phosphatase 6	1.6	1.5 (1.0 - 2.2)	1MKPA	1	0	0	1
P4HB	Protein disulfide-isomerase	1.5	1.5 (1.0 - 2.3)	4EL1A	4	0	0	4

## Sheet: HNSC
Protein		Cancer		Structure
Symbol	Name	FC	HR (95% CI)	PDB	All	ENZ	PPI	OTH
SERPINE1	Plasminogen activator inhibitor 1	2.9	1.5 (1.1 - 2.1)	1C5GA	1	1	0	0
FST	Follistatin	2.7	1.4 (1.0 - 1.9)	3HH2D	2	0	0	2
PLAU	Urokinase-type plasminogen activator	2.5	1.5 (1.1 - 2.1)	2VNTD	1*	1	0	0
ITGA5	Integrin alpha-5	2.3	1.4 (1.0 - 1.9)	3VI4A	4	0	1	3
HNF4A	Hepatocyte nuclear factor 4-alpha	2.3	1.4 (1.0 - 1.9)	4IQRE	2	0	1	1
SYT1	Synaptotagmin-1	2.1	1.7 (1.2 - 2.3)	2R83A	1	0	0	1
PTPRR	Receptor-type tyrosine-protein phosphatase R	2	1.4 (1.0 - 1.9)	2A8BA	2	1	0	1
BCHE	Cholinesterase	1.9	1.4 (1.0 - 1.9)	4TPKA	3*	1	0	2
AURKA	Aurora kinase A	1.8	1.4 (1.0 - 1.9)	2J4ZB	2*	1	0	1
FSCN1	Fascin	1.7	1.5 (1.1 - 2.1)	3P53B	2	0	0	2
ADA	Adenosine deaminase	1.6	1.6 (1.2 - 2.2)	3IARA	2	1	0	1
NAGS	N-acetylglutamate synthase, mitochondrial	1.5	1.4 (1.0 - 1.9)	4K30B	1	0	0	1
CBX2	Chromobox protein homolog 2	1.5	1.4 (1.0 - 1.9)	3H91A	1	0	1	0

## Sheet: KIRC
Protein		Cancer		Structure
Symbol	Name	FC	HR (95% CI)	PDB	All	ENZ	PPI	OTH
CRP	C-reactive protein	6.8	1.9 (1.3 - 2.6)	3PVOD	1	0	0	1
KLK4	Kallikrein-4	6.4	1.5 (1.1 - 2.1)	4K8YA	1*	1	0	0
ORM1	Alpha-1-acid glycoprotein 1	6.1	1.4 (1.0 - 1.9)	3KQ0A	1	0	0	1
TAT	Tyrosine aminotransferase	5.1	1.4 (1.0 - 1.9)	3DYDB	2	0	0	2
IFNG	Interferon gamma	4.8	1.6 (1.1 - 2.2)	3BESL	1	0	0	1
AKR1D1	3-oxo-5-beta-steroid 4-dehydrogenase	4.5	1.6 (1.2 - 2.2)	3UZWB	2	1	0	1
TF	Serotransferrin	4.4	2.0 (1.5 - 2.8)	3V8XB	5	0	1	4
MMP9	Matrix metalloproteinase-9	4.3	1.8 (1.3 - 2.5)	1ITVA;1L6JA	6	1	0	5
ITPKA	Inositol-trisphosphate 3-kinase A	4.3	3.0 (2.1 - 4.2)	1W2FA	1	1	0	0
HSPA7	Putative heat shock 70 kDa protein 7	4.1	1.9 (1.4 - 2.6)	3FE1B	1	1	0	0
NNMT	Nicotinamide N-methyltransferase	4	1.7 (1.3 - 2.4)	2IIPA	1	1	0	0
F2	Prothrombin	3.8	2.5 (1.8 - 3.4)	4NZQA	6	0	0	6
SERPIND1	Heparin cofactor 2	3.8	1.6 (1.2 - 2.2)	1JMOA	5	0	0	5
ITGAX	Integrin alpha-X	3.4	1.5 (1.1 - 2.1)	4NENA	7	0	0	7
C3	Complement C3	3.4	1.5 (1.1 - 2.0)	2WIIA;2WIIB	15	0	2	13
RNASET2	Ribonuclease T2	3.2	1.9 (1.3 - 2.6)	3T0OA	2	0	0	2
TP73	Tumor protein p73	3.2	1.4 (1.0 - 2.0)	3VD0D	2	0	0	2
AIM2	Interferon-inducible protein AIM2	3.2	2.0 (1.4 - 2.7)	3RN5D	1	0	0	1
CPA4	Carboxypeptidase A4	3.2	2.0 (1.4 - 2.7)	2BOAA	2	1	0	1
ZAP70	Tyrosine-protein kinase ZAP-70	3.2	1.6 (1.2 - 2.3)	4K2RA	7	1	0	6
GZMH	Granzyme H	3.1	1.5 (1.1 - 2.0)	3TJVA	1	1	0	0
PARP15	Poly [ADP-ribose] polymerase 15	3.1	1.5 (1.1 - 2.1)	3GEYA;3V2BA	2*	1	0	1
CTLA4	Cytotoxic T-lymphocyte protein 4	3	1.7 (1.2 - 2.4)	2X44D	1	0	0	1
HK3	Hexokinase-3	2.9	1.8 (1.3 - 2.5)	3HM8C	5	1	0	4
PKMYT1	Membrane-associated tyrosine- and threonine-specific cdc2-inhibitory kinase	2.9	1.9 (1.4 - 2.7)	3P1AA	2	1	0	1
AURKB	Aurora kinase B	2.9	2.7 (1.9 - 3.8)	4AF3A	2*	1	0	1
CDC25C	M-phase inducer phosphatase 3	2.9	1.9 (1.4 - 2.7)	3OP3A	1	0	0	1
PTPRN	Receptor-type tyrosine-protein phosphatase-like N	2.9	1.5 (1.1 - 2.1)	2I1YB	2	0	0	2
GCKR	Glucokinase regulatory protein	2.9	2.5 (1.8 - 3.5)	4OLHA	6	0	0	6
MMP12	Macrophage metalloelastase	2.9	1.7 (1.2 - 2.3)	3BA0A	3	0	0	3
CYP2D6	Cytochrome P450 2D6	2.8	1.7 (1.2 - 2.3)	3QM4A	5*	0	0	5
AKR1B10	Aldo-keto reductase family 1 member B10	2.8	2.0 (1.4 - 2.7)	4JIIX	1*	1	0	0
CSF3R	Granulocyte colony-stimulating factor receptor	2.8	1.5 (1.1 - 2.0)	2D9QB	1	0	0	1
BIRC5	Baculoviral IAP repeat-containing protein 5	2.7	2.6 (1.8 - 3.6)	3UEHA	1	0	0	1
HSPA6	Heat shock 70 kDa protein 6	2.7	1.8 (1.3 - 2.4)	3FE1B	1	1	0	0
TDO2	Tryptophan 2,3-dioxygenase	2.7	1.5 (1.1 - 2.1)	4PW8F	2	1	1	1
MELK	Maternal embryonic leucine zipper kinase	2.7	1.7 (1.2 - 2.3)	4UMUA	4*	1	0	3
SULT4A1	Sulfotransferase 4A1	2.7	1.7 (1.2 - 2.3)	1ZD1A	1	1	0	0
UHRF1	E3 ubiquitin-protein ligase UHRF1	2.6	2.0 (1.5 - 2.8)	4GY5B;2PB7A	2	1	0	1
JAK3	Tyrosine-protein kinase JAK3	2.5	2.9 (2.1 - 4.2)	3LXLA	1*	1	0	0
RNASE2	Non-secretory ribonuclease	2.5	2.0 (1.4 - 2.8)	1K2AA	1	1	1	0
KLRC2	NKG2-C type II integral membrane protein	2.5	2.0 (1.4 - 2.7)	3BDWD	1	0	0	1
CHI3L2	Chitinase-3-like protein 2	2.5	2.0 (1.5 - 2.8)	4P8XA	2	0	0	2
ISG20	Interferon-stimulated gene 20 kDa protein	2.4	1.6 (1.2 - 2.2)	1WLJA	1	1	0	0
CENPM	Centromere protein M	2.4	2.1 (1.5 - 2.9)	4P0TA	1	0	0	1
RHEBL1	GTPase RhebL1	2.4	1.6 (1.1 - 2.2)	3OESA	2	1	0	1
LILRB2	Leukocyte immunoglobulin-like receptor subfamily B member 2	2.4	1.5 (1.1 - 2.0)	4LLAB;2GW5A	2	0	0	2
TNFAIP8L2	Tumor necrosis factor alpha-induced protein 8-like protein 2	2.4	1.6 (1.1 - 2.2)	3F4MA	1	0	0	1
ADA	Adenosine deaminase	2.4	2.1 (1.5 - 2.9)	3IARA	2*	1	0	1
IL2RA	Interleukin-2 receptor subunit alpha	2.3	1.4 (1.0 - 1.9)	2ERJE	1	0	1	0
BUB1	Mitotic checkpoint serine/threonine-protein kinase BUB1	2.3	2.1 (1.5 - 2.9)	4R8QA	4	1	0	3
ADAM8	Disintegrin and metalloproteinase domain-containing protein 8	2.3	2.6 (1.8 - 3.6)	4DD8A	1*	1	0	0
SERPINE1	Plasminogen activator inhibitor 1	2.3	1.5 (1.1 - 2.0)	1C5GA	1	1	0	0
EME1	Crossover junction endonuclease EME1	2.3	2.2 (1.6 - 3.1)	4P0QB	1	0	0	1
RRM2	Ribonucleoside-diphosphate reductase subunit M2	2.3	2.0 (1.4 - 2.7)	2UW2A	2	0	0	2
PLK1	Serine/threonine-protein kinase PLK1	2.3	2.4 (1.7 - 3.3)	1Q4KB;2OWBA	4*	1	1	2
PF4V1	Platelet factor 4 variant	2.2	1.4 (1.0 - 1.9)	4HSVD	1	0	0	1
PLCB2	1-phosphatidylinositol 4,5-bisphosphate phosphodiesterase beta-2	2.2	1.5 (1.1 - 2.0)	2ZKMX	9	0	0	9
CARD11	Caspase recruitment domain-containing protein 11	2.2	1.4 (1.0 - 2.0)	4LWDA	1	0	0	1
PTPN22	Tyrosine-protein phosphatase non-receptor type 22	2.2	1.5 (1.1 - 2.1)	4J51B	3	0	0	3
XDH	Xanthine dehydrogenase/oxidase	2.2	1.9 (1.4 - 2.7)	2E1QD	10	1	0	9
KLRC1	NKG2-A/NKG2-B type II integral membrane protein	2.2	1.6 (1.2 - 2.2)	3BDWD	1	0	0	1
IL2	Interleukin-2	2.2	1.6 (1.1 - 2.1)	1PW6A	1	0	0	1
ZBTB32	Zinc finger and BTB domain-containing protein 32	2.2	1.5 (1.1 - 2.0)	3M5BB	1	0	1	0
RAC2	Ras-related C3 botulinum toxin substrate 2	2.1	1.5 (1.1 - 2.1)	4GZLB	1	1	0	0
ANXA8L2	Annexin A8-like protein 2	2.1	1.7 (1.3 - 2.4)	1W45B	1	0	0	1
TIMP1	Metalloproteinase inhibitor 1	2.1	2.5 (1.8 - 3.6)	1UEAB	2	0	0	2
CRYBB1	Beta-crystallin B1	2.1	1.5 (1.1 - 2.1)	1OKIA	1	0	0	1
KIFC1	Kinesin-like protein KIFC1	2.1	1.5 (1.1 - 2.1)	2REPA	2	1	0	1
NCF4	Neutrophil cytosol factor 4	2.1	1.9 (1.4 - 2.6)	1OEYK;1H6HA	3	0	0	3
ALOX5	Arachidonate 5-lipoxygenase	2.1	1.7 (1.2 - 2.3)	3O8YA	7	1	0	6
CCNA2	Cyclin-A2	2.1	2.2 (1.6 - 3.0)	2BPMD	1	0	0	1
FABP5	Fatty acid-binding protein, epidermal	2.1	1.7 (1.3 - 2.4)	4LKPA	1	0	0	1
ITGAM	Integrin alpha-M	2.1	1.4 (1.0 - 1.9)	4M76B	2	0	0	2
TOP2A	DNA topoisomerase 2-alpha	2.1	1.7 (1.3 - 2.4)	4R1FA;4FM9A	8	2	0	6
ITGA5	Integrin alpha-5	2	1.4 (1.1 - 2.0)	3VI4A	4	0	1	3
ADAMTS4	A disintegrin and metalloproteinase with thrombospondin motifs 4	2	1.6 (1.2 - 2.2)	2RJPC	1*	1	0	0
MEF2B	Myocyte-specific enhancer factor 2B	2	1.9 (1.4 - 2.6)	1TQER	1	0	1	0
FCGR2B	Low affinity immunoglobulin gamma Fc region receptor II-b	2	1.4 (1.0 - 1.9)	3WJLC	1	0	0	1
AMY1A	Alpha-amylase 1	2	1.4 (1.1 - 2.0)	3IJ9A	1*	1	0	0
EZH2	Histone-lysine N-methyltransferase EZH2	2	1.9 (1.4 - 2.6)	4MI0A	2	0	0	2
EXO1	Exonuclease 1	2	1.9 (1.4 - 2.6)	3QEBZ	3	0	0	3
CLIC3	Chloride intracellular channel protein 3	2	1.6 (1.1 - 2.1)	3KJYB	1	0	0	1
APOA1	Apolipoprotein A-I	2	1.7 (1.2 - 2.4)	2A01C	6	0	0	6
CYP2C9	Cytochrome P450 2C9	1.9	1.7 (1.3 - 2.4)	1R9OA	5	0	0	5
HIST1H2BH	Histone H2B type 1-H	1.9	1.9 (1.4 - 2.6)	3AV1D	1	0	1	0
OSM	Oncostatin-M	1.9	1.7 (1.2 - 2.4)	1EVSA	1	0	0	1
AMY2B	Alpha-amylase 2B	1.9	1.5 (1.1 - 2.0)	3IJ9A	1*	1	0	0
RPGRIP1	X-linked retinitis pigmentosa GTPase regulator-interacting protein 1	1.9	1.4 (1.0 - 1.9)	4QAMB	1	0	0	1
FN1	Fibronectin	1.9	1.5 (1.1 - 2.0)	3M7PA	3	0	0	3
NEK2	Serine/threonine-protein kinase Nek2	1.9	2.0 (1.4 - 2.8)	2XK4A	3*	1	0	2
SPHK1	Sphingosine kinase 1	1.8	2.3 (1.6 - 3.2)	4L02B	1	1	0	0
CDC20	Cell division cycle protein 20 homolog	1.8	2.4 (1.7 - 3.4)	4GGDB	2*	0	0	2
PYCR1	Pyrroline-5-carboxylate reductase 1, mitochondrial	1.8	2.6 (1.8 - 3.6)	2IZZA	1	1	0	0
ANXA8	Annexin A8	1.8	2.2 (1.6 - 3.0)	1W45B	1	0	0	1
RYR2	Ryanodine receptor 2	1.8	2.0 (1.5 - 2.8)	4JKQA	5	0	0	5
TTK	Dual specificity protein kinase TTK	1.8	1.7 (1.3 - 2.4)	2ZMDA	1*	1	0	0
PTPN7	Tyrosine-protein phosphatase non-receptor type 7	1.8	1.8 (1.3 - 2.4)	1ZC0A	2	0	0	2
CENPE	Centromere-associated protein E	1.8	1.9 (1.4 - 2.6)	1T5CA	3	1	0	2
TGM3	Protein-glutamine gamma-glutamyltransferase E	1.8	1.9 (1.4 - 2.6)	1NUDB	6	1	0	5
GSG2	Serine/threonine-protein kinase haspin	1.8	1.9 (1.4 - 2.7)	3DLZA	1*	1	1	0
KIF18A	Kinesin-like protein KIF18A	1.8	2.3 (1.6 - 3.2)	3LREB	4	1	0	3
TBX4	T-box transcription factor TBX4	1.8	1.5 (1.1 - 2.1)	2X6VB	1	0	1	0
LY96	Lymphocyte antigen 96	1.8	1.8 (1.3 - 2.5)	4G8AC	1	0	0	1
RAD51	DNA repair protein RAD51 homolog 1	1.7	1.4 (1.1 - 2.0)	1N0WA	2	0	0	2
ITGA2B	Integrin alpha-IIb	1.7	2.1 (1.5 - 2.9)	2VDNA	3	0	1	2
NR1I2	Nuclear receptor subfamily 1 group I member 2	1.7	1.6 (1.2 - 2.2)	3CTBA	3*	1	1	1
ACTN2	Alpha-actinin-2	1.7	2.1 (1.5 - 2.9)	1HCIA;1WKUA	2	0	0	2
TAPBP	Tapasin	1.7	1.5 (1.1 - 2.1)	3F8UB	2	0	1	1
GMIP	GEM-interacting protein	1.7	1.8 (1.3 - 2.6)	3QWEA	2	0	0	2
KIF2C	Kinesin-like protein KIF2C	1.7	2.4 (1.7 - 3.4)	2HEHA	2	1	0	1
IFI16	Gamma-interferon-inducible protein 16	1.6	2.0 (1.4 - 2.7)	2OQ0C;3RNUA	2	0	0	2
FSCN1	Fascin	1.6	1.4 (1.0 - 1.9)	3P53B	2	0	0	2
PLAUR	Urokinase plasminogen activator surface receptor	1.6	2.1 (1.5 - 2.9)	1YWHM	3	0	2	1
CSAD	Cysteine sulfinic acid decarboxylase	1.6	1.7 (1.3 - 2.4)	2JISA	5	0	3	2
TLR2	Toll-like receptor 2	1.6	1.5 (1.1 - 2.1)	1FYXA	1	0	0	1
SIRPA	Tyrosine-protein phosphatase non-receptor type substrate 1	1.6	1.5 (1.1 - 2.0)	2JJVA;2WNGA	2	0	2	0
GAPDH	Glyceraldehyde-3-phosphate dehydrogenase	1.5	1.5 (1.1 - 2.1)	1ZNQO	1	1	1	0
GLIPR1	Glioma pathogenesis-related protein 1	1.5	1.6 (1.2 - 2.2)	3Q2RA	1	0	0	1
MMP14	Matrix metalloproteinase-14	1.5	1.8 (1.3 - 2.4)	3MA2A	1	1	1	0
IL4R	Interleukin-4 receptor subunit alpha	1.5	1.8 (1.3 - 2.5)	1IARB	1	0	0	1

## Sheet: LUAD
Protein		Cancer		Structure
Symbol	Name	FC	HR (95% CI)	PDB	All	ENZ	PPI	OTH
FGB	Fibrinogen beta chain	9.2	1.5 (1.0 - 2.1)	3GHGE	1	0	0	1
FAM83A	Protein FAM83A	6.9	1.8 (1.2 - 2.6)	4URJD	1	0	0	1
TCN1	Transcobalamin-1	6.8	1.5 (1.0 - 2.1)	4KKJA	4	0	0	4
CA9	Carbonic anhydrase 9	6	1.7 (1.1 - 2.4)	3IAIC	3	1	0	2
DUSP9	Dual specificity protein phosphatase 9	4.7	1.5 (1.0 - 2.1)	2HXPA	1	0	1	0
SERPINB5	Serpin B5	4.6	2.0 (1.4 - 2.9)	1XU8A	3	0	0	3
XDH	Xanthine dehydrogenase/oxidase	4.5	1.5 (1.0 - 2.1)	2E1QD	10	1	0	9
CDC25C	M-phase inducer phosphatase 3	4.3	1.7 (1.2 - 2.5)	3OP3A	1	0	0	1
RHCG	Ammonium transporter Rh type C	4.3	1.5 (1.0 - 2.1)	3HD6A	5	0	3	2
TOP2A	DNA topoisomerase 2-alpha	4.1	1.5 (1.0 - 2.1)	4R1FA;4FM9A	8	2	0	6
MELK	Maternal embryonic leucine zipper kinase	4	1.5 (1.0 - 2.1)	4UMUA	4*	1	0	3
EXO1	Exonuclease 1	4	1.6 (1.1 - 2.3)	3QEBZ	3	0	0	3
CDC20	Cell division cycle protein 20 homolog	4	1.6 (1.1 - 2.3)	4GGDB	2*	0	0	2
SERPINB4	Serpin B4	4	1.5 (1.0 - 2.1)	2ZV6A	4	0	0	4
NEK2	Serine/threonine-protein kinase Nek2	3.9	1.8 (1.2 - 2.6)	2XK4A	3*	1	0	2
PCK1	Phosphoenolpyruvate carboxykinase, cytosolic [GTP]	3.8	1.5 (1.0 - 2.1)	2GMVA	8	2	0	6
TTK	Dual specificity protein kinase TTK	3.8	1.7 (1.2 - 2.5)	2ZMDA	1*	1	0	0
AURKB	Aurora kinase B	3.8	1.5 (1.0 - 2.1)	4AF3A	2*	1	0	1
CCNE1	G1/S-specific cyclin-E1	3.5	1.5 (1.1 - 2.2)	1W98B	2	0	1	1
PLK1	Serine/threonine-protein kinase PLK1	3.5	1.8 (1.2 - 2.6)	1Q4KB;2OWBA	4*	1	1	2
RRM2	Ribonucleoside-diphosphate reductase subunit M2	3.3	1.7 (1.2 - 2.5)	2UW2A	2	0	0	2
CCNB1	G2/mitotic-specific cyclin-B1	3	1.8 (1.2 - 2.6)	2B9RB	1	0	0	1
HIST1H2BO	Histone H2B type 1-O	3	1.8 (1.2 - 2.6)	3AV1D	1	0	1	0
CCNA2	Cyclin-A2	3	2.1 (1.4 - 3.0)	2BPMD	1	0	0	1
BUB1	Mitotic checkpoint serine/threonine-protein kinase BUB1	3	1.8 (1.2 - 2.6)	4R8QA	4	1	0	3
KIF23	Kinesin-like protein KIF23	2.9	1.6 (1.1 - 2.4)	3VHXH	1	0	0	1
CENPE	Centromere-associated protein E	2.9	1.6 (1.1 - 2.4)	1T5CA	3	1	0	2
KIF11	Kinesin-like protein KIF11	2.9	1.6 (1.1 - 2.3)	4AP0A	3	1	0	2
CASC5	Protein CASC5	2.9	1.5 (1.1 - 2.2)	4NF9B	2	0	1	1
KIFC1	Kinesin-like protein KIFC1	2.9	1.4 (1.0 - 2.1)	2REPA	2	1	0	1
IL11	Interleukin-11	2.8	1.5 (1.0 - 2.1)	4MHLA	2	0	0	2
AURKA	Aurora kinase A	2.8	1.5 (1.0 - 2.1)	2J4ZB	2*	1	0	1
TK1	Thymidine kinase, cytosolic	2.7	1.5 (1.0 - 2.1)	2ORVB	1*	1	0	0
MAD2L1	Mitotic spindle assembly checkpoint protein MAD2A	2.7	1.7 (1.2 - 2.4)	2V64F	1	0	1	0
HCN2	Potassium/sodium hyperpolarization-activated cyclic nucleotide-gated channel 2	2.7	1.9 (1.3 - 2.8)	3OTFA	1	1	0	0
GINS4	DNA replication complex GINS protein SLD5	2.6	1.5 (1.0 - 2.2)	2E9XH	2	0	1	1
CDA	Cytidine deaminase	2.5	1.7 (1.2 - 2.5)	1MQ0B	1	1	1	0
RAD51	DNA repair protein RAD51 homolog 1	2.5	1.5 (1.0 - 2.2)	1N0WA	2	0	0	2
TYMS	Thymidylate synthase	2.2	1.6 (1.1 - 2.3)	1HW4A	2*	1	0	1
CHEK1	Serine/threonine-protein kinase Chk1	2.2	1.5 (1.0 - 2.1)	2R0UA	1*	1	0	0
ARHGAP11B	Rho GTPase-activating protein 11B	2.2	1.6 (1.1 - 2.3)	3EAPA	3	0	0	3
PLK4	Serine/threonine-protein kinase PLK4	2.2	1.5 (1.0 - 2.1)	3COKA	3*	1	0	2
ERO1L	ERO1-like protein alpha	2.2	1.7 (1.2 - 2.4)	3AHQA	5	1	0	4
ARHGAP11A	Rho GTPase-activating protein 11A	2.2	1.6 (1.1 - 2.3)	3EAPA	3	0	0	3
SERPINB3	Serpin B3	2.2	1.7 (1.2 - 2.4)	2ZV6A	4	0	0	4
KPNA2	Importin subunit alpha-1	2	1.5 (1.0 - 2.1)	4E4VB	1	0	0	1
NT5E	5'-nucleotidase	2	1.5 (1.0 - 2.1)	4H2BA	4	1	0	3
CENPM	Centromere protein M	1.9	1.5 (1.0 - 2.1)	4P0TA	1	0	0	1
PAICS	Multifunctional protein ADE2	1.9	1.5 (1.1 - 2.2)	2H31A	2	0	0	2
UCK2	Uridine-cytidine kinase 2	1.9	1.7 (1.1 - 2.4)	1XRJA	1	1	0	0
GSG2	Serine/threonine-protein kinase haspin	1.9	1.4 (1.0 - 2.1)	3DLZA	1*	1	1	0
IFNL1	Interferon lambda-1	1.9	1.5 (1.0 - 2.2)	3OG6A	1	0	0	1
PDIA4	Protein disulfide-isomerase A4	1.8	1.4 (1.0 - 2.1)	3IDVA	1	1	0	0
MMP8	Neutrophil collagenase	1.8	1.5 (1.1 - 2.2)	1BZSA	2*	1	0	1
GAPDH	Glyceraldehyde-3-phosphate dehydrogenase	1.8	1.4 (1.0 - 2.1)	1ZNQO	1	1	1	0
ITGB4	Integrin beta-4	1.7	1.7 (1.2 - 2.4)	3F7RA	1	0	0	1
KIF18A	Kinesin-like protein KIF18A	1.5	1.6 (1.1 - 2.3)	3LREB	4	1	0	3

## Sheet: LUSC
Protein		Cancer		Structure
Symbol	Name	FC	HR (95% CI)	PDB	All	ENZ	PPI	OTH
FAM83A	Protein FAM83A	6.5	1.5 (1.1 - 2.1)	4URJD	1	0	0	1
ALDH1L1	Cytosolic 10-formyltetrahydrofolate dehydrogenase	2.5	1.4 (1.0 - 1.9)	2CFIA	1	1	0	0
DMC1	Meiotic recombination protein DMC1/LIM15 homolog	2.3	1.4 (1.0 - 2.0)	4HYYD	2	0	0	2
AOC1	Amiloride-sensitive amine oxidase [copper-containing]	1.9	1.5 (1.1 - 2.1)	3MPHA	7	1	2	4
COL3A1	Collagen alpha-1(III) chain	1.7	1.4 (1.0 - 2.0)	4AE2A	1	0	0	1
ACOT11	Acyl-coenzyme A thioesterase 11	1.6	1.6 (1.2 - 2.2)	3FO5A	1	1	0	0
RHOD	Rho-related GTP-binding protein RhoD	1.6	1.4 (1.0 - 1.9)	2J1LA	1	1	0	0

## Sheet: THCA
Protein		Cancer		Structure
Symbol	Name	FC	HR (95% CI)	PDB	All	ENZ	PPI	OTH
TH	Tyrosine 3-monooxygenase	1.6	3.5 (1.0 - 12.4)	2XSNB	2	1	1	0
F12	Coagulation factor XII	1.5	3.8 (1.1 - 13.7)	4BDXA	1	0	0	1

## Sheet: TNBC
Protein		Cancer		Structure
Symbol	Name	FC	HR (95% CI)	PDB	All	ENZ	PPI	OTH
RRM2	Ribonucleoside-diphosphate reductase subunit M2	4.6	3.2 (0.9 - 10.9)	2UW2A	2	0	0	2
ARHGAP11A	Rho GTPase-activating protein 11A	3.2	3.8 (1.0 - 14.6)	3EAPA	3	0	0	3
INHBA	Inhibin beta A chain	2.6	5.7 (1.5 - 21.6)	1S4YB	1	0	0	1
FN1	Fibronectin	2.5	5.6 (1.5 - 21.2)	3M7PA	3	0	0	3
SDS	L-serine dehydratase/L-threonine deaminase	2.2	4.6 (1.0 - 21.1)	1P5JA	1	1	0	0
TNFSF4	Tumor necrosis factor ligand superfamily member 4	1.8	3.6 (1.0 - 13.4)	2HEVF	1	0	0	1
EPHB2	Ephrin type-B receptor 2	1.6	4.4 (1.2 - 16.7)	2QBXB;3ZFMA	3	1	1	1
PLAU	Urokinase-type plasminogen activator	1.5	5.6 (1.2 - 26.2)	2VNTD	1*	1	0	0

## Sheet: UCEC
Protein		Cancer		Structure
Symbol	Name	FC	HR (95% CI)	PDB	All	ENZ	PPI	OTH
EPHA8	Ephrin type-A receptor 8	5.4	4.7 (1.0 - 21.5)	3KULB	3	1	0	2
SERPINB4	Serpin B4	5	4.6 (1.2 - 17.1)	2ZV6A	4	0	0	4
DPYSL5	Dihydropyrimidinase-related protein 5	4.7	8.5 (1.1 - 66.2)	4B90B	2	0	0	2
MELK	Maternal embryonic leucine zipper kinase	3.9	3.6 (0.9 - 13.6)	4UMUA	4*	1	0	3
RRM2	Ribonucleoside-diphosphate reductase subunit M2	3.5	4.4 (0.9 - 20.3)	2UW2A	2	0	0	2
GGH	Gamma-glutamyl hydrolase	2.9	3.3 (1.0 - 11.4)	1L9XA	2	1	0	1
AIM2	Interferon-inducible protein AIM2	2.6	3.8 (1.0 - 14.1)	3RN5D	1	0	0	1
PTPRN	Receptor-type tyrosine-protein phosphatase-like N	2.3	4.1 (1.1 - 15.7)	2I1YB	2	0	0	2
ATAD2	ATPase family AAA domain-containing protein 2	1.8	3.6 (1.0 - 13.2)	4QSPA	1*	0	1	0
